# Supplementary material for: Comparative genomics, pangenomics, and phenomic studies of Pectobacterium betavasculorum strains isolated from sugar beet, potato, sunflower, and artichoke: insights into pathogenicity, virulence determinants, and adaptation to the host plant
Source: Frontiers journal article supplement (doi:10.3389/fpls.2024.1352318), 2024-03-21
Supplement: Data_Sheet_1.ZIP [file Data_Sheet_1.ZIP]

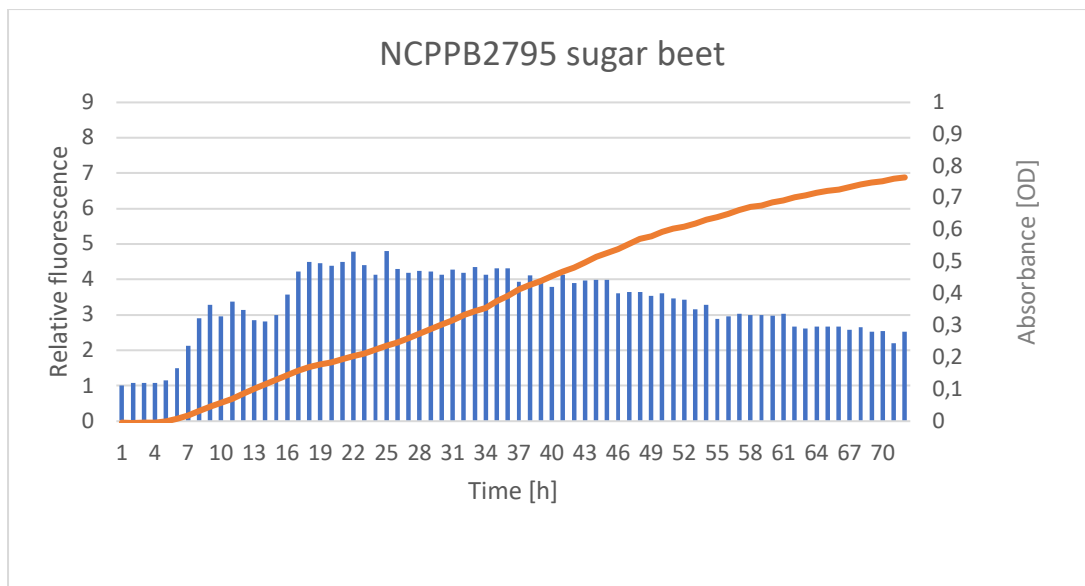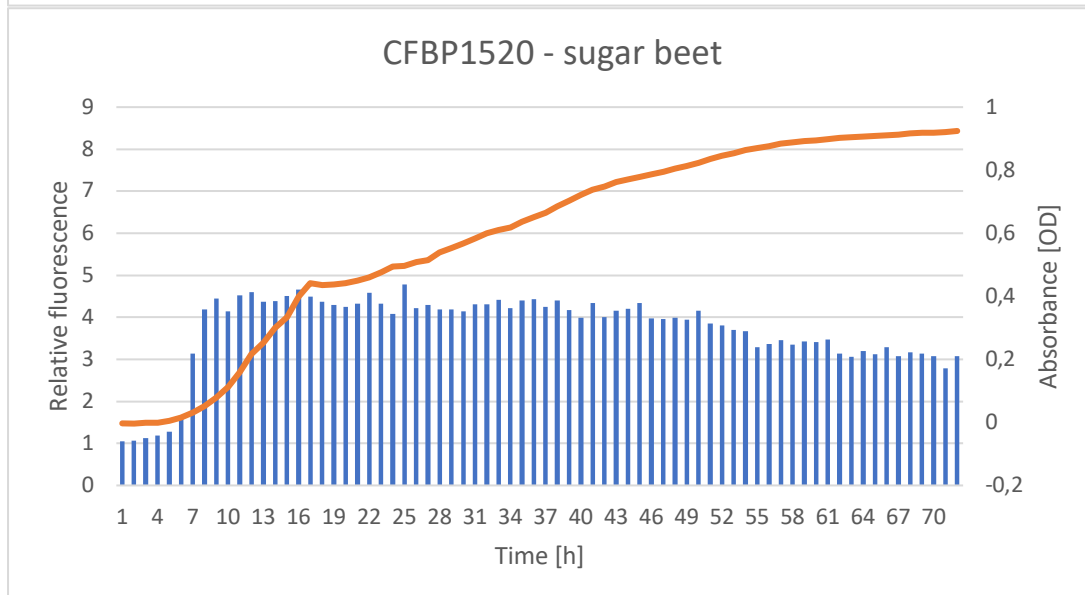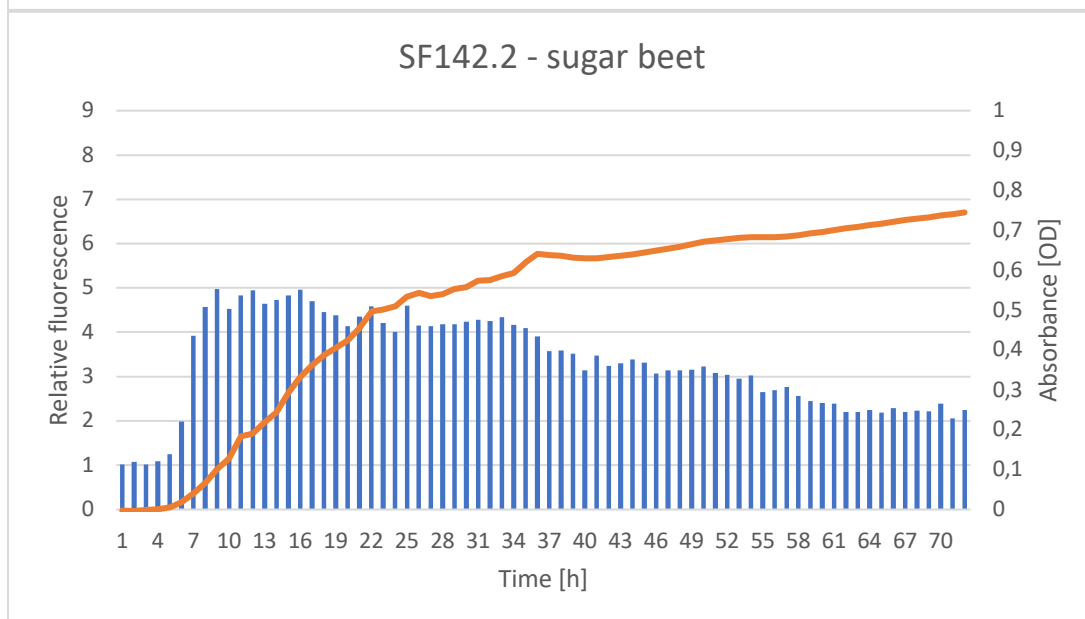

NCPB2795 - fodder beet

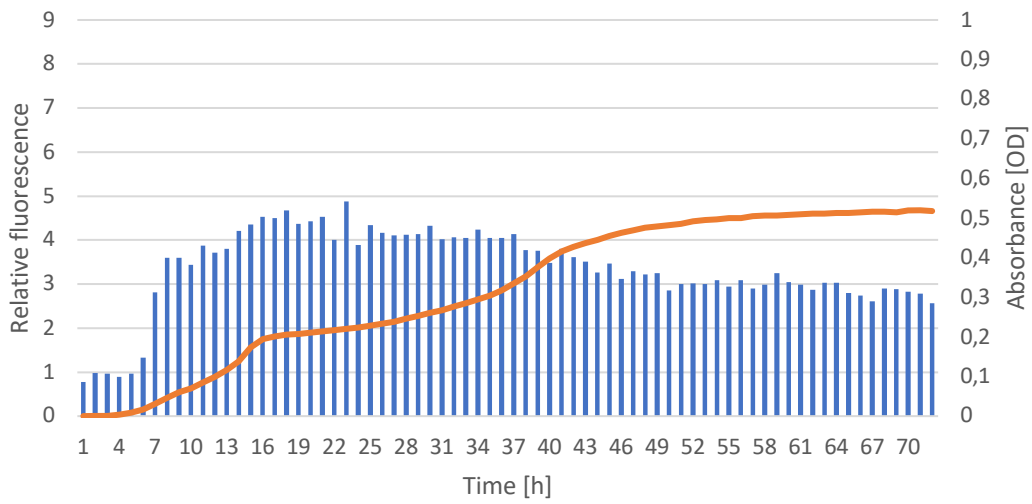

CFBP1520 - fodder beet

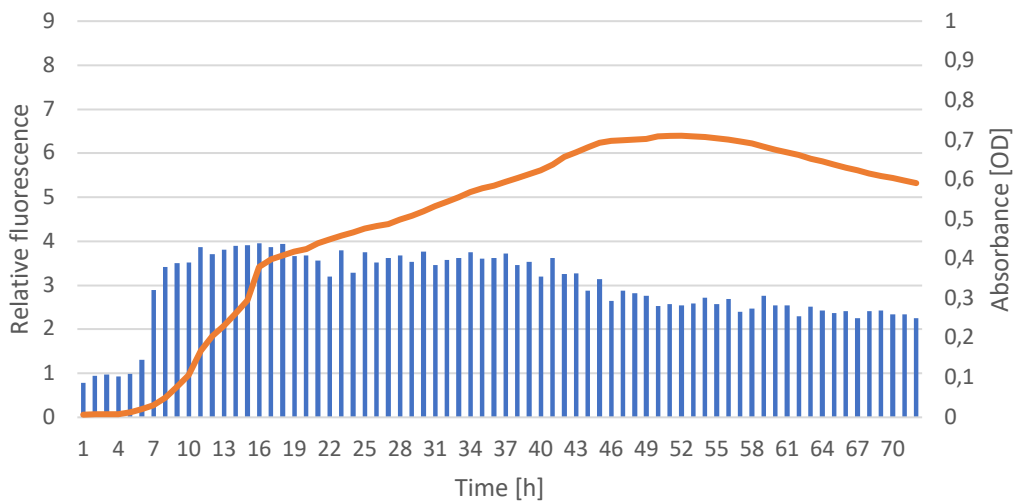

SF142.2 - fodder beet

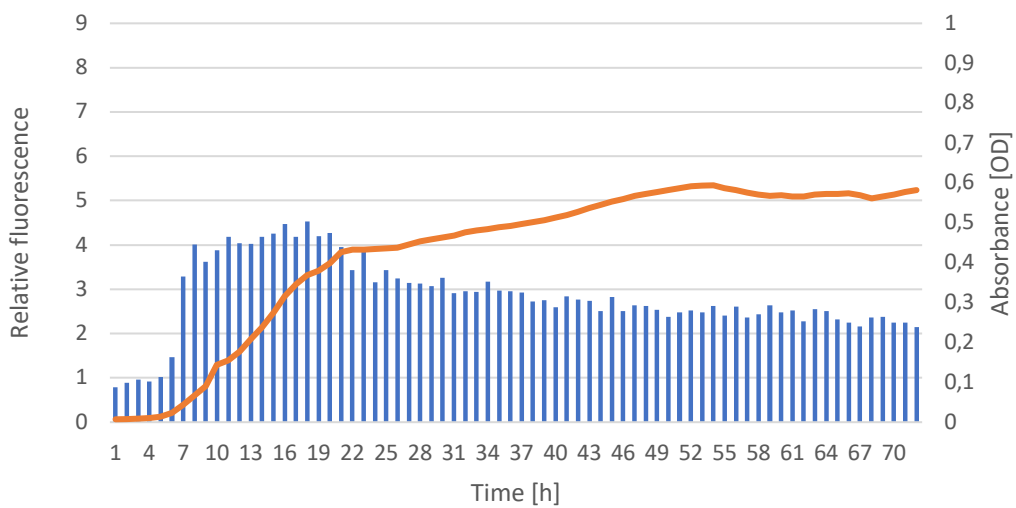

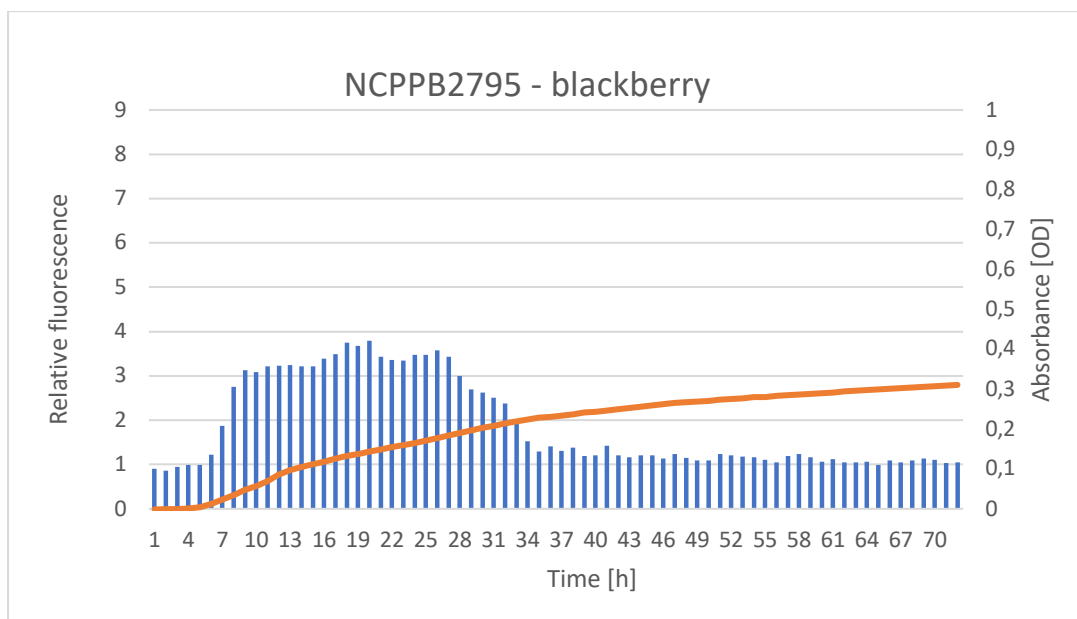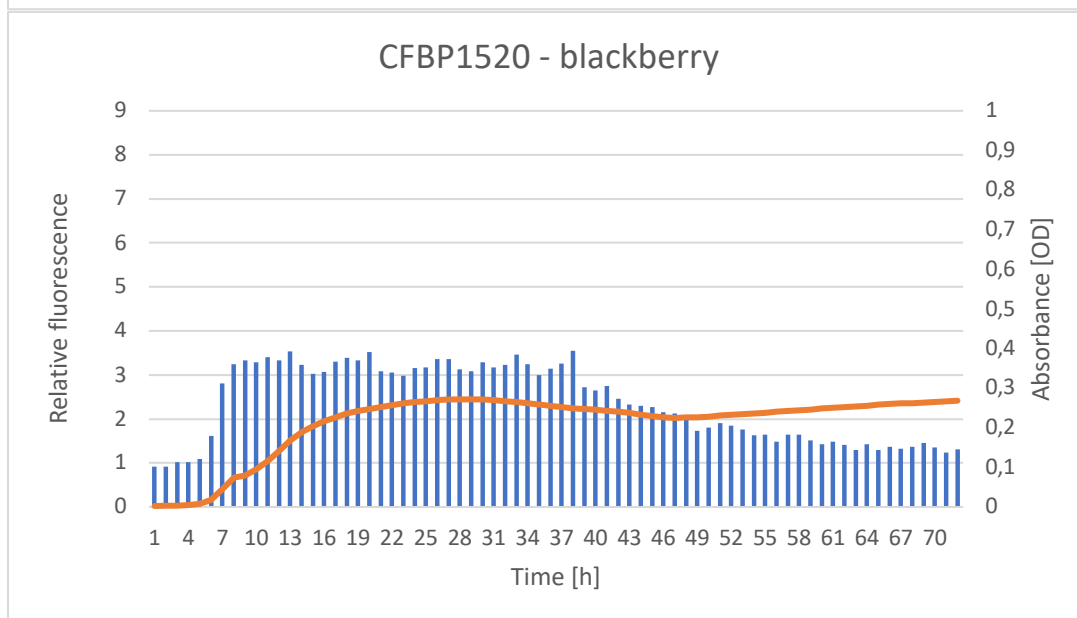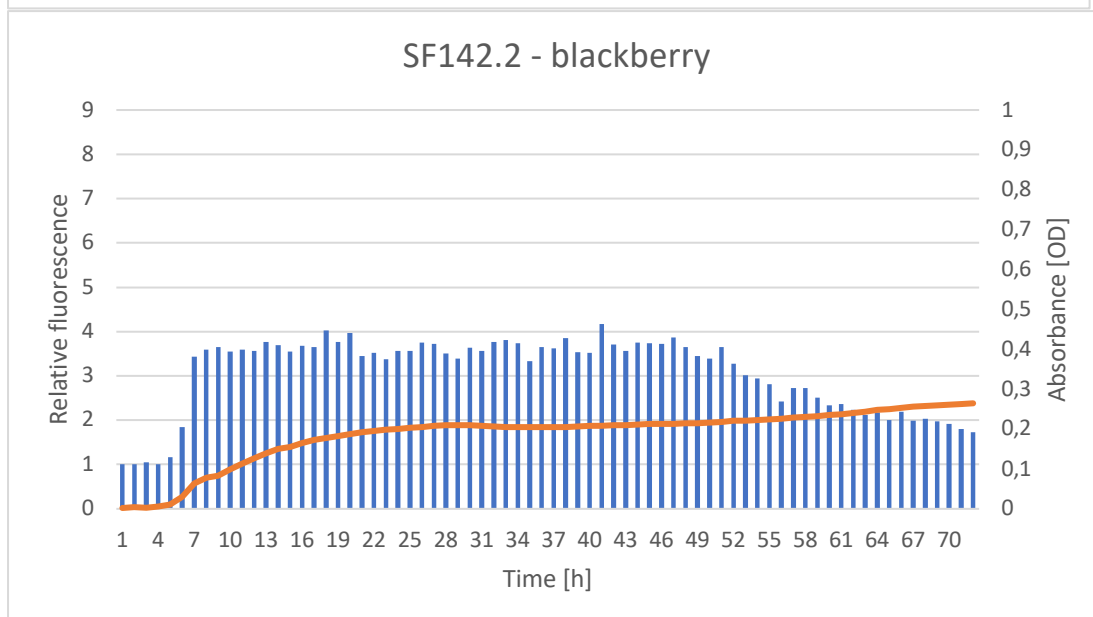

NCPB2795 - Dragon fruit

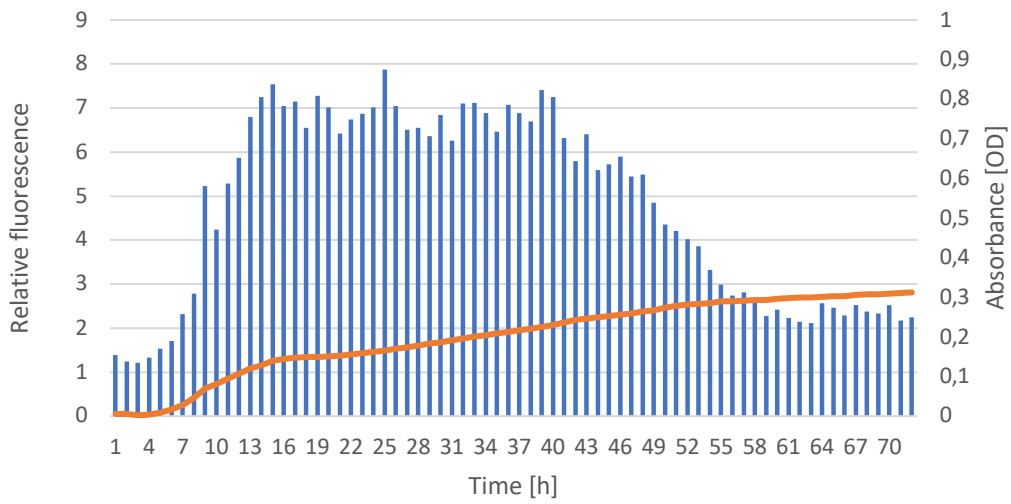

CFBP1520 - Dragon fruit

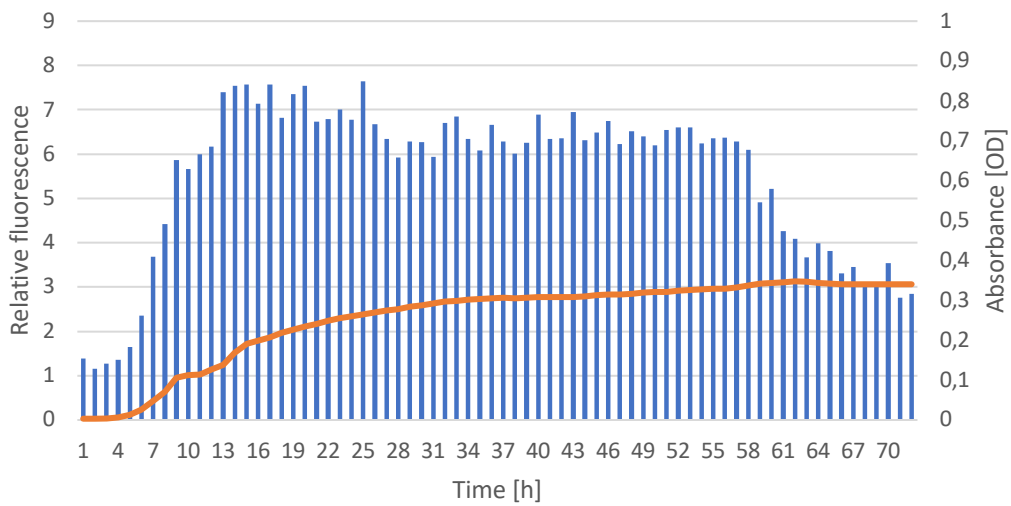

SF142.2 - Dragon fruit

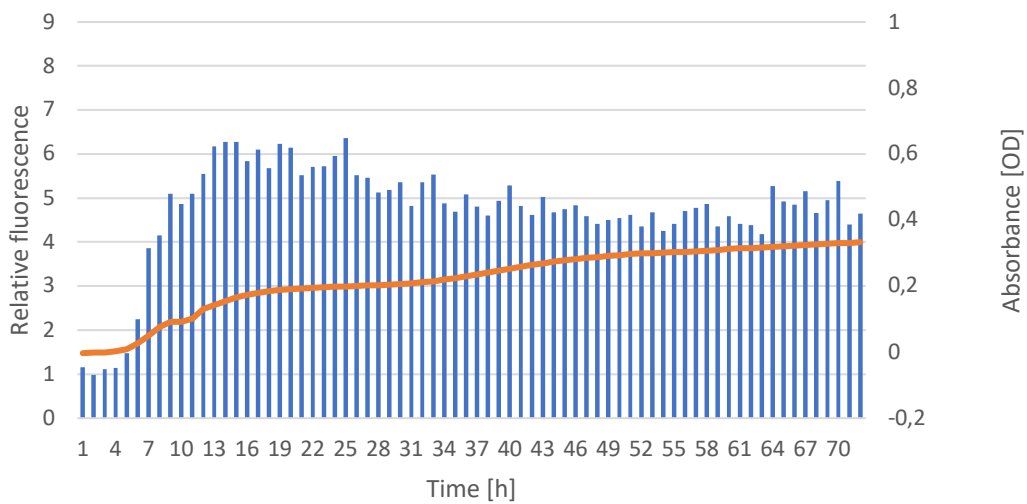

### NCPB2795 - ground cherry

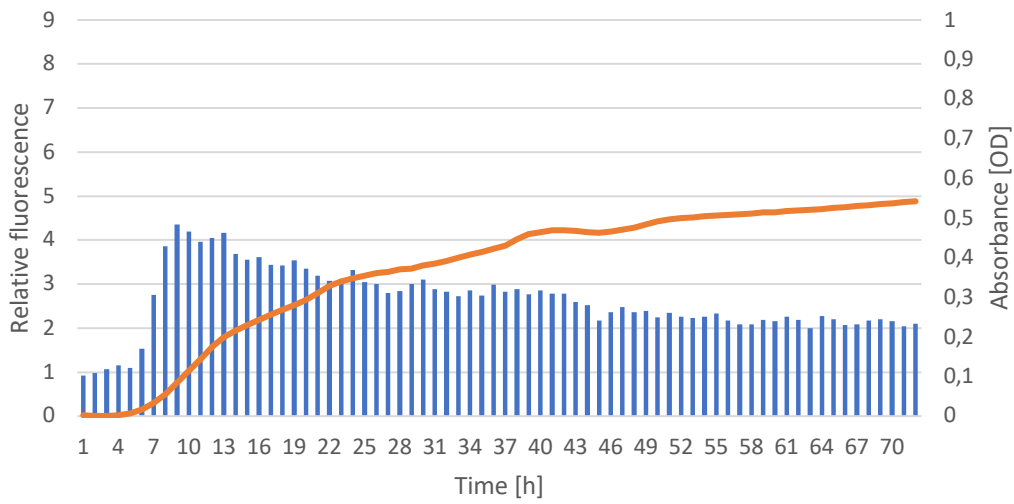

### CFBP1520 - ground cherry

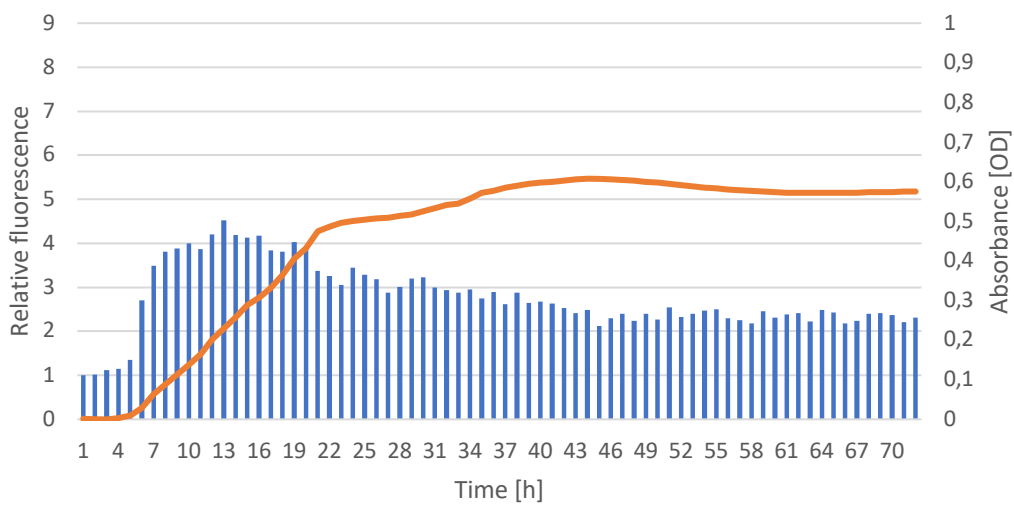

### SF142.2 - ground cherry

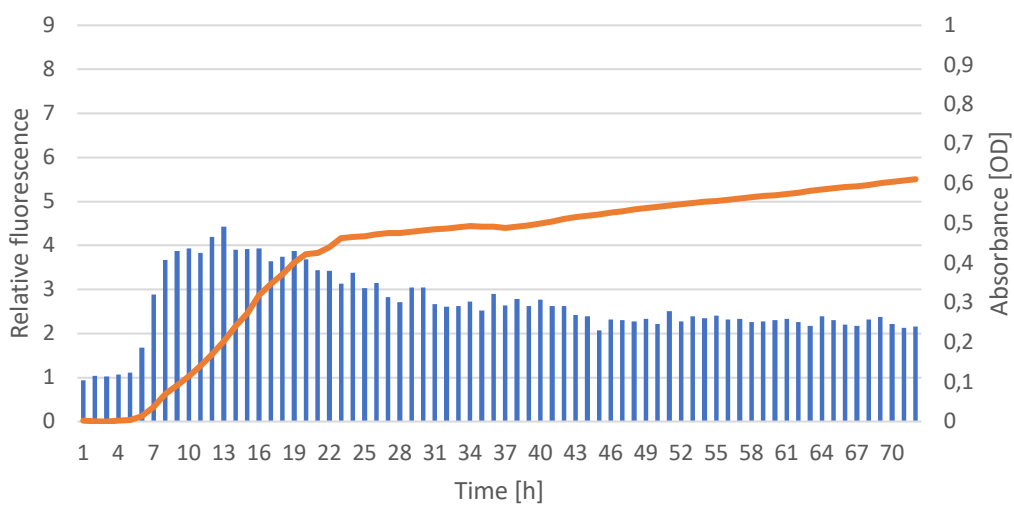

NCPB2795 - black nightshade

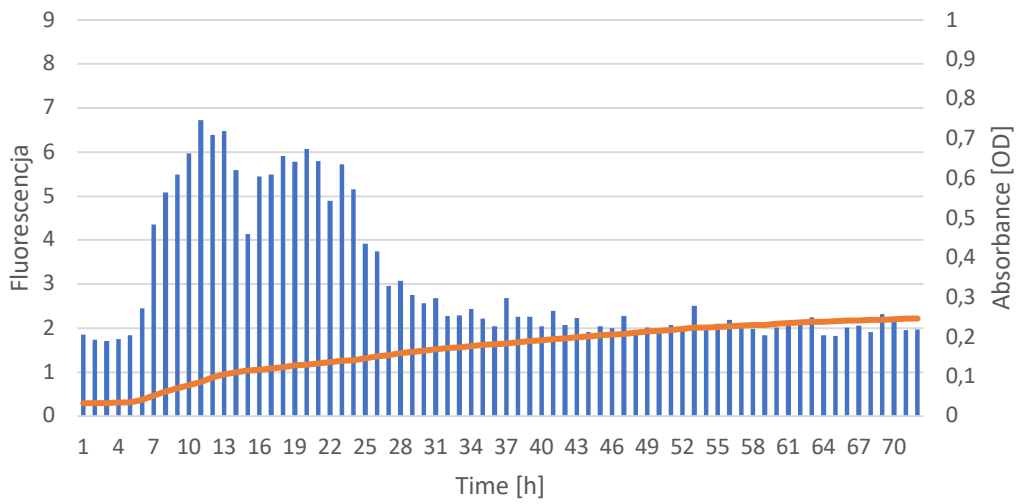

CFBP1520 - black nightshade

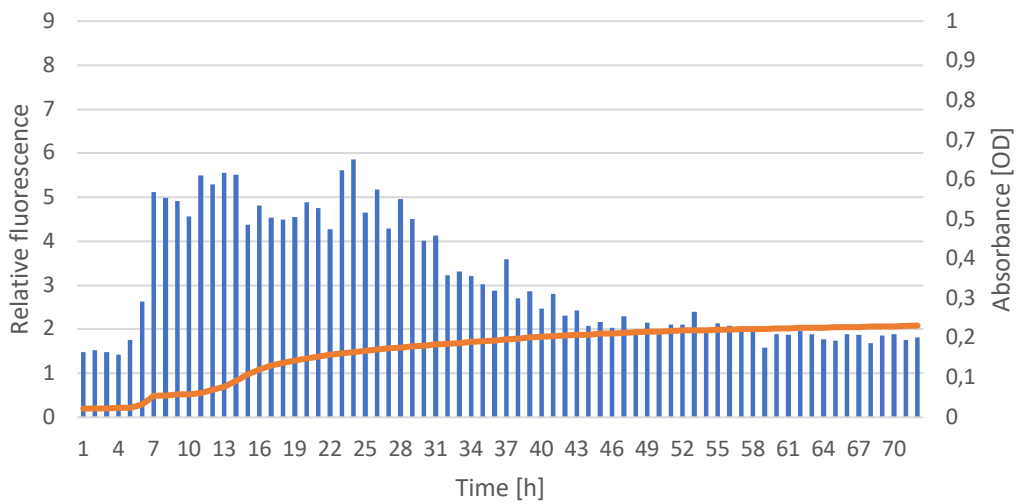

SF142.2 - black nightshade

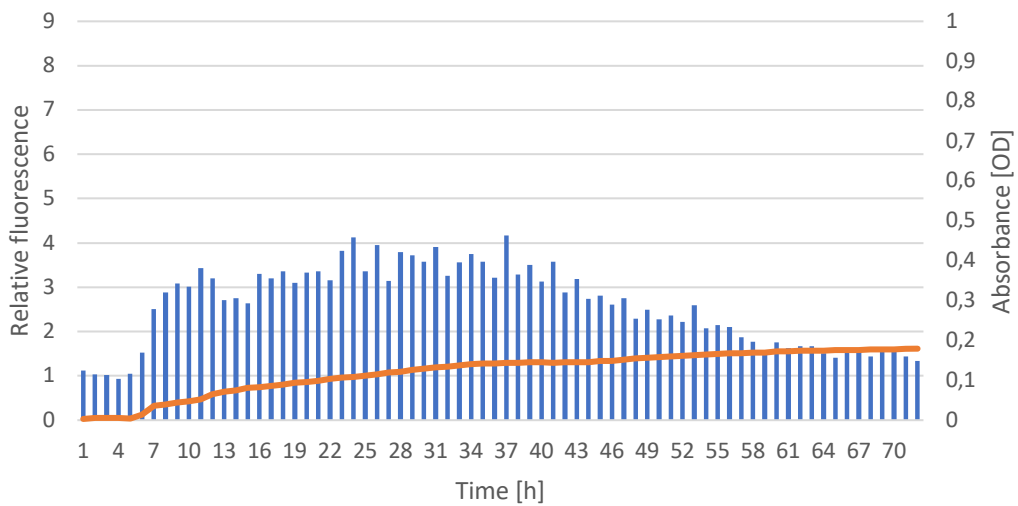

NCPB2795 - orchid

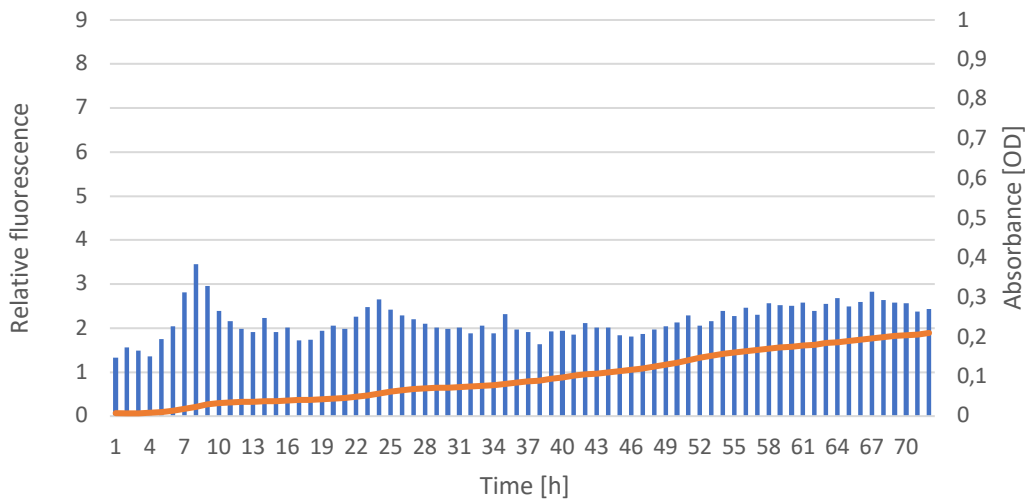

CFBP1520 - orchid

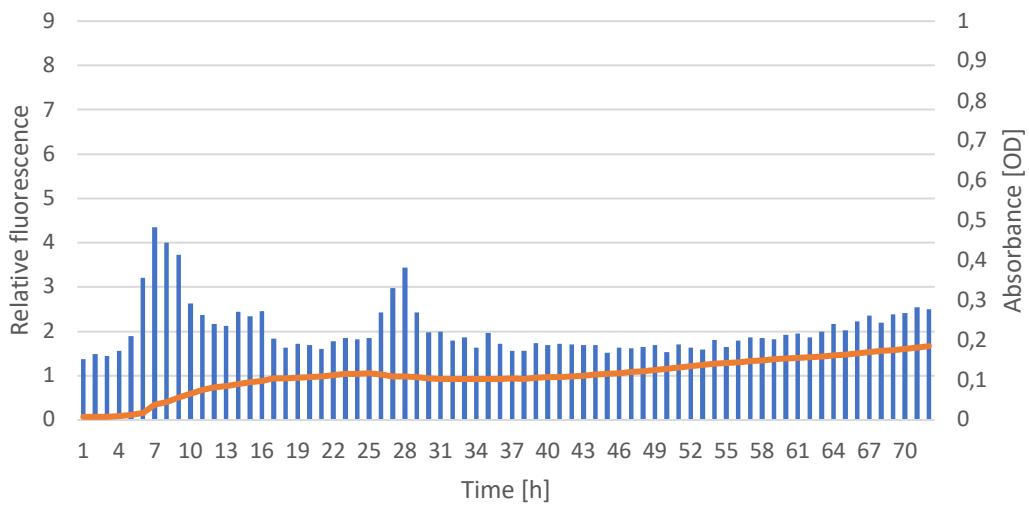

SF142.2 - orchid

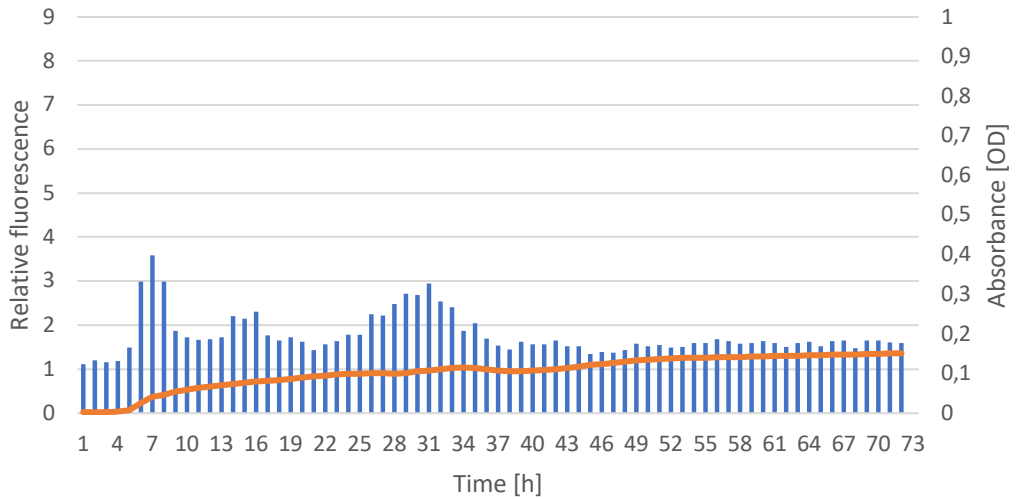

### NCPB2795 - Calla lilly

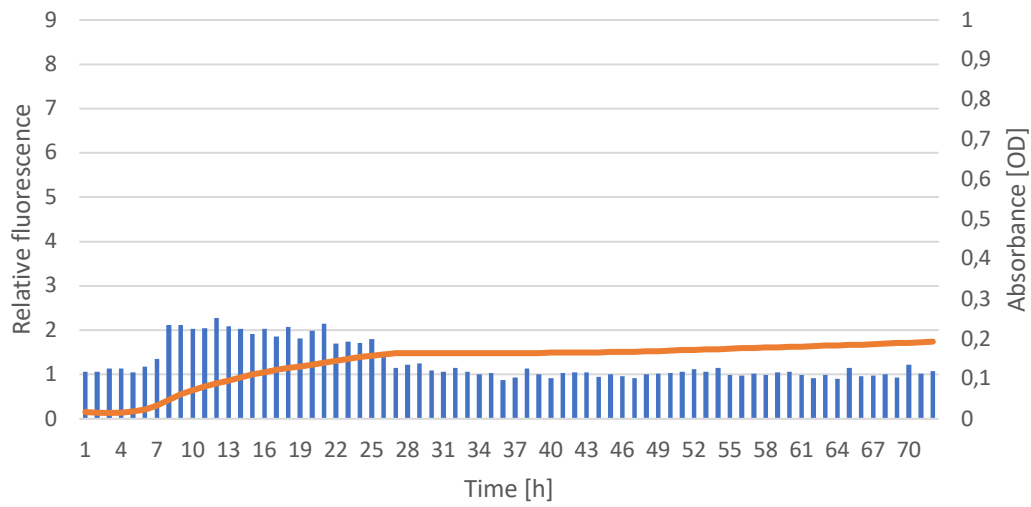

### CFBP1520 - Calla lilly

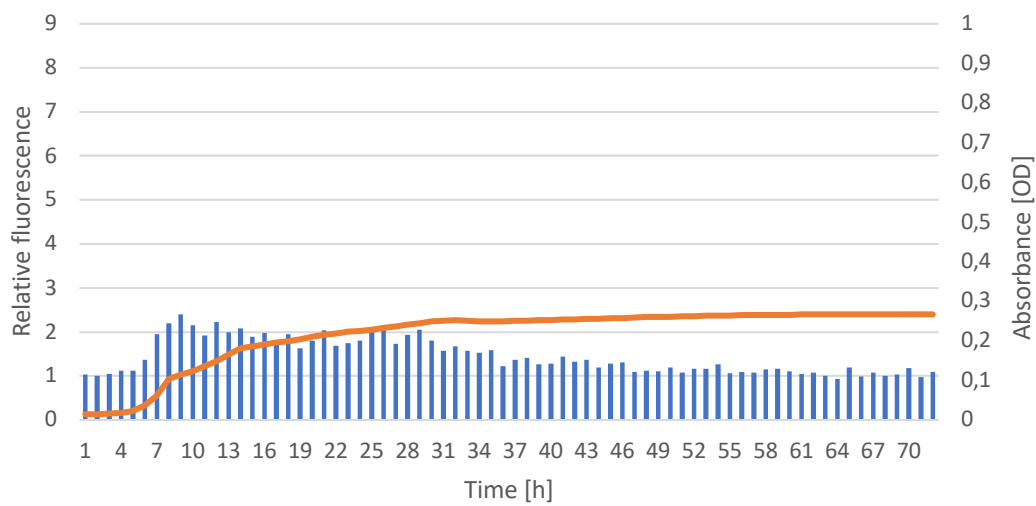

### SF142.2 - Calla lilly

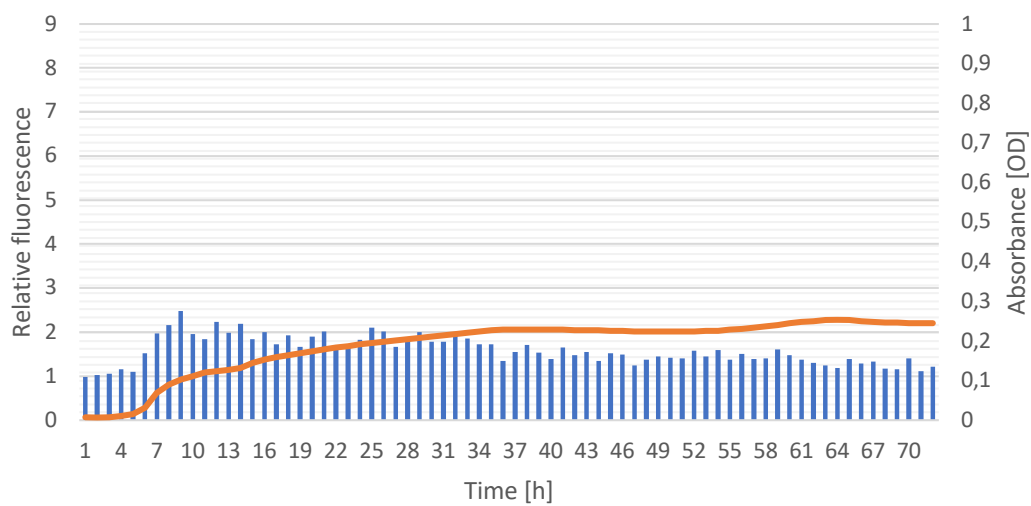

### NCPB2795 - viviparous

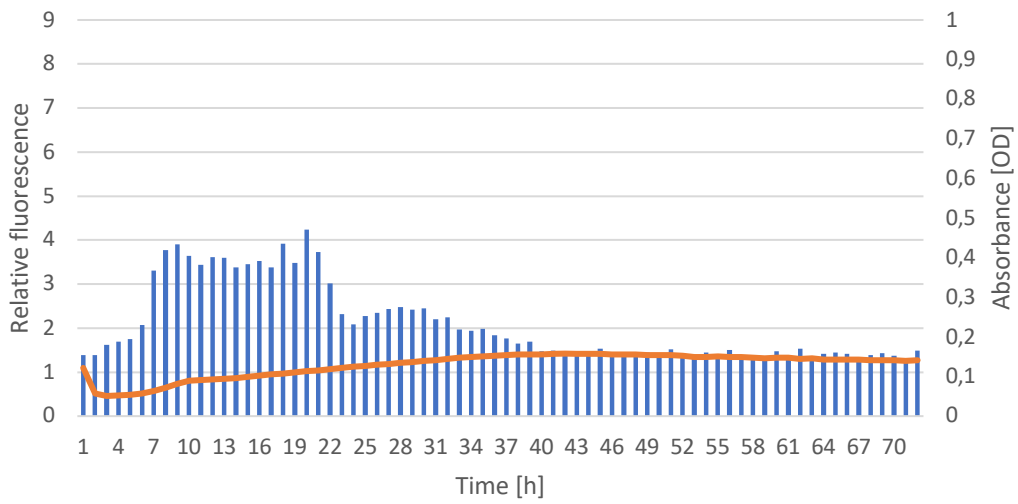

### CFBP1520 - viviparous

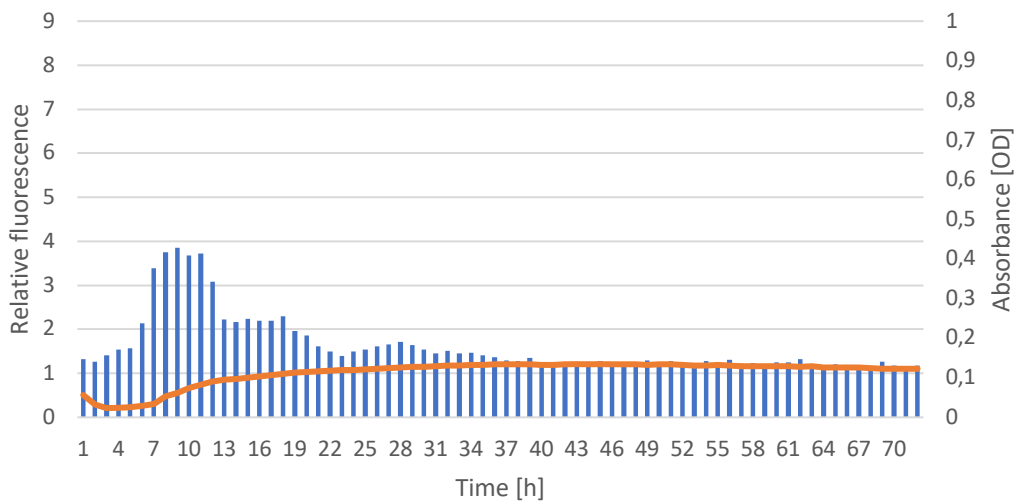

### SF142.2 - viviparous

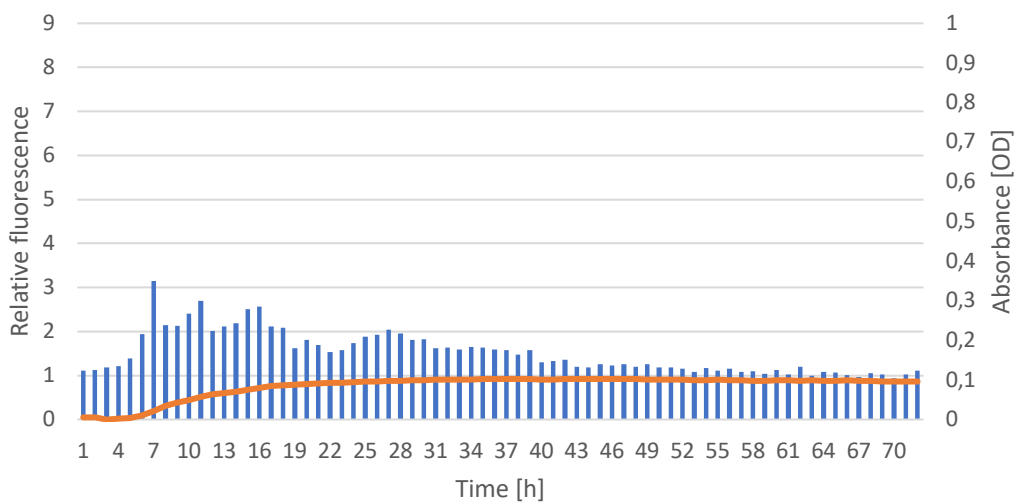

-  Absorbance [OD] growth of bacteria
-  The relative fluorescence – metabolism of bacteria
