# Supplementary material for: Comparative genomics, pangenomics, and phenomic studies of Pectobacterium betavasculorum strains isolated from sugar beet, potato, sunflower, and artichoke: insights into pathogenicity, virulence determinants, and adaptation to the host plant
Source: Front Plant Sci. 2024 Mar 21;15:1352318. doi: 10.3389/fpls.2024.1352318 (PMC10991766; doi:10.3389/fpls.2024.1352318)
Supplement: Supplementary file 2 [file Table_1.xlsx]

## Sheet: TableS1 Phenotypic charact
TableS1 Phenotypic characteristics of Pectobacterium betavasculorum and type strains of other closely related Pectobacterium species (enzymatic assays, sugar fermentation diatabs)
	P. betavasculorum											P. zantedeschiae	P. atrosepticum	P. peruviense	P. parmentieri	P. wasabiae	P. polonicum	P. punjabense	P. aroidearum
Assay	CFBP1520	SF142.2	CFBP3291	NCPPB2795T	NCPPB2793	NCPPB2794	NCPPB3075	Ecb168	CFBP5531	CFBP5536	CFBP5540	9MT	ICMP1526T	IFB5232T	SCC3193	CFBP3304T	DPMP315T	SS95T	LMG2417T
Acid production from α-methyl glucoside	+	+	+	+	+	+	+	+	+	+	+	+	+	-	-	-	-	-	-
reducing sugars from sucrose	-	-	-	-	-	-	-	-	-	-	-	-	+	-	-	-	-	-	-
Utilization of citrate	-	-	-	-	-	-	-	-	-	-	-	-	-	-	-	-	-	-	-
Growth on 4% NaCl	+	+	+	+	-	+	+	+	+	+	+	+	-	+	-	-	+	+	+
Phosphatase activity	-	-	-	-	-	-	-	-	-	-	-	-	-	-	-	-	-	-	-
Oxidase activity	-	-	-	-	-	-	-	-	-	-	-	-	-	-	-	-	-	-	-
Catalase activity	+	+	+	+	+	+	+	+	+	+	+	+	+	+	+	+	+	+	+
Urease activity	-	-	-	-	-	-	-	-	-	-	-	-	-	-	-	-	-	-	-
Gelatinase activity	-	-	-	-	-	-	+	-	-	-	+/-	nt	nt	nt	nt	nt	nt	nt	nt
Kaseinase activity	+	+	+	+	+	+	+	+	+	+	+	nt	nt	nt	nt	nt	nt	nt	nt
Lipsae activity	-	-	-	-	-	-	-	-	-	-	-	nt	nt	nt	nt	nt	nt	nt	nt
Amylase activity	-	-	-	-	-	-	-	-	-	-	-	nt	nt	nt	nt	nt	nt	nt	nt
Acetoine and 2,3-Butanediol production	+	+	+	+	+	+	+	+	+	+	+	+	+	+	+	+	+	+	+
Indol production	-	-	-	-	-	-	-	-	-	-	-	-	-	-	-	-	-	-	-
Auxin production	+	+	+	+	+	+	+	+	+	+	+	+	+	+	+	+	+	+	+
Siderophore production	+	+	+	+	+	+	+	+	+	+	+	+	+	+	+	+	+	+	+
AHL production	+	+	+	+	+	+	+	+	+	+	+	+/-	+	nt	+	nt	nt	nt	+
Fermentation assays (DIATABS)
arabinose	+	+	+	+	+	+	+	+	+	+	+	+	+	+	+	+	+	nt	+
glucose	+	+	+	+	+	+	+	+	+	+	+	+	+	+	+	+	+	+	+
lactose	-	+	-	-	+	-	-	-	-	-	+/-	+	+	+	+	+	+	+	+
maltose	+/-	+	-	+/-	+	+	+/-	+/-	+	+	+	-	+	+	+	+	-	-	-
trehalose	+	+	+/-	-	-	+/-	+/-	+	+	+	+	-	+	+	-	-	-	-	-
sucrose	+	+	+	+	+	+	+	+	+	+	+	+	+	+	-	-	+	+	+
raffinose	+	+	+	+	+	+	+	+	+/-	+/-	+	+	+	+	-	+	-	+	+
rhamnose	+	+	+	+	+	+	+	+	+	+	+	+	+	+	-	+	+/-	+	+
melibiose	+	+	+	+	+	+	+	+	+	+	+	+	+	-	-	+	+/-	+	+
mannose	+	+	+	+	+	+	+	+	+	+	+	+	+	+	-	-	-	nt	+
d-xylose	+	+	+	+	+	+	+	+	+	+	+	+	-	-	-	-	+	+	+
adonitol	-	-	-	-	-	-	-	-	-	-	-	-	-	-	-	-	-	-	-
mannitol	+	+	+	+	+	+	+	+	+	+	+	+	+	+	-	+	+	+	+
sorbitol	-	-	-	-	-	-	-	-	-	-	-	-	+	+	-	-	-	-	-
inulin	+	+	+	+	+	+	+	+	+	+	+	nt	nt	nt	nt	nt	nt	nt	nt
Enzymatic activity assays (DIATABS)
α-glucosidase	+	+	+	+	+	+	+	+	+	+	+	+	+	+	+	+	+	+	+
β-glucosidase	+	+	+	+	+	+	+	+	+	+	+	+	+	+	+	+	nt	nt	+
α-galactosidase	+	+	+	+	+	+	+	+	+	+	+	+	+	+	+	-	+	+	+
β-galactosidase	+	+	+	+	+	+	+	+	+	+	+	+	+	+	+	+	+	+	+
β-glucuronidase	+	+	+	+	+	+	+	+	+	+	+	-	-	-	-	-	-	-	-
α-fucosidase	-	-	-	-	-	-	-	-	-	-	-	-	-	-	-	-	nt	nt	-
β-xylosidase	-	-	-	-	-	-	-	-	-	-	-	+	-	-	-	-	-	-	+
ornithine decarboxylase	+	+	+	+	+	+	+	+	+	+	+	+	+	+	+	+	+	+	+
lysine decaroboxylase	-	-	-	-	-	-	-	-	-	-	-	-	-	-	-	-	-	-	-

## Sheet: Table_S2_ BIOLOG_GENIII
Table S2. Phenotypic characteristics of P. betavasculorum and type strains of other closely related Pectobacterium species with BIOLOG_GENIII assay
Species / Assay	P. betavasculorum											P. atrosepticum	P. zantedeschiae	P. peruviense	P. parmentieri	P. wasabiae	P. polonicum	P. punjabense	P. aroidearum
Assay/ Strain	IFB5271	SF142.2	NCPPB2795 T	NCPPB2793	NCPPB2794	NCPPB3075	Ecb168	CFBP5540	CFBP3291	CFBP5531	CFBP5536	ICMP1526T	9MT	IFB5232T	SCC3193	CFBP3304T	DPMP315T	SS95T	LMG2417T
Dextrin	2	2	2	2	2	2	2	2	2	2	2	2	2	2	0	2	0	0	0
D-Maltose	2	2	2	2	2	2	2	2	2	2	2	2	2	0	0	0	0	0	0
D-Trehalose	2	2	2	2	2	2	2	2	2	2	2	2	2	2	2	2	2	2	2
D-Cellobiose	1	2	2	2	2	2	2	2	2	2	2	2	2	2	2	2	2	2	2
Gentiobiose	2	2	2	2	2	2	2	2	2	2	2	2	2	2	2	2	2	2	2
Sucrose	2	2	2	2	2	2	2	2	2	2	2	2	2	2	2	2	2	2	2
D-Turanose	2	2	2	2	2	2	2	2	2	2	2	0	2	0	0	0	0	0	0
Stachyose	0	0	0	0	0	0	0	0	0	0	1	2	2	2	2	0	2	2	2
pH 6	2	2	2	2	2	2	2	2	2	2	2	2	2	2	2	2	2	2	2
pH 5	0	0	0	2	0	0	0	2	2	2	2	0	2	2	2	1	0	0	1
D-Raffinose	0	0	2	2	2	2	0	2	2	2	2	2	2	2	2	2	2	2	2
α-D-Lactose	0	0	1	2	2	2	0	2	2	2	2	2	2	2	2	2	2	2	2
D-Melibiose	1	0	1	2	2	2	0	2	2	2	2	2	2	2	2	0	2	2	2
β-Methyl-D-Glucoside	2	2	2	2	2	2	2	2	2	2	2	2	2	2	2	2	2	2	2
D-Salicin	2	2	2	2	2	2	2	2	2	2	2	2	2	2	2	2	2	2	2
N-Acetyl-D-Glucosamine	2	2	2	2	2	2	2	2	2	2	2	2	2	2	2	2	2	2	2
N-Acetyl-β-D-Mannosamine	0	0	0	2	2	0	2	2	2	2	2	0	2	1	0	0	1	0	1
N-Acetyl-D-Galactosamine	0	0	0	2	2	0	1	0	2	1	1	0	0	0	2	0	0	0	0
N-Acetyl Neuraminic Acid	0	0	0	0	0	0	0	0	0	0	1	0	0	0	0	0	0	0	0
1% NaCl	2	2	2	2	2	2	2	2	2	2	2	2	2	2	2	2	2	2	2
4% NaCl	2	2	2	2	0	0	0	2	2	2	2	0	2	2	0	2	2	2	2
8% NaCl	0	0	0	0	0	0	0	2	2	0	0	0	2	0	0	0	0	0	0
α-D-Glucose	2	2	2	2	2	2	2	2	2	2	2	2	2	2	2	2	2	2	2
D-Mannose	2	2	2	2	2	2	2	2	2	2	2	2	2	2	2	2	2	2	2
D-Fructose	2	2	2	2	2	2	2	2	2	2	2	2	2	2	2	2	2	2	2
D-Galactose	2	2	0	2	2	2	2	2	2	2	2	2	2	2	2	2	2	2	2
3-Methyl Glucose	0	0	]	2	2	1	2	2	2	2	2	0	2	0	0	0	0	0	0
D-Fucose	0	0	0	2	2	1	1	2	2	2	2	0	2	0	0	0	0	0	0
L-Fucose	0	0	0	2	2	1	1	2	2	2	2	0	2	0	0	0	0	0	0
L-Rhamnose	2	2	2	2	2	2	2	2	2	2	2	2	2	2	2	2	2	1	2
Inosine	1	1	2	2	2	2	0	2	2	2	2	2	2	2	0	2	0	0	1
1% Sodium Lactate	2	2	2	2	2	2	2	2	2	2	2	2	2	2	2	2	2	2	2
Fusidic Acid	2	2	2	2	0	2	0	2	2	2	2	2	2	2	2	2	2	0	2
D-Sorbitol	2	2	2	2	2	2	1	2	2	2	2	0	2	0	0	0	0	0	0
D-Mannitol	2	2	2	2	2	2	2	2	2	2	2	2	2	2	2	2	2	2	2
D-Arabitol	0	0	0	2	2	2	1	2	2	2	2	0	2	0	0	0	0	0	0
myo-Inositol	2	2	2	2	2	2	2	2	2	2	2	2	2	2	2	2	2	2	2
Glycerol	2	2	2	2	2	2	2	2	2	2	2	2	2	2	2	2	2	2	2
D-Glucose-6-PO4	2	2	2	2	2	2	2	2	2	2	2	2	2	2	2	2	2	2	2
D-Fructose-6-PO4	2	2	2	2	2	2	2	2	2	2	2	2	2	2	2	1	2	2	2
D-Aspartic Acid	2	2	2	2	2	2	2	2	2	2	2	2	2	2	2	1	2	2	2
D-Serine	0	0	0	0	0	0	0	0	0	0	0	0	2	0	1	0	0	0	2
Troleandomycin	2	2	2	2	2	2	2	2	2	2	2	2	2	2	2	2	2	2	2
Rifamycin SV	2	2	2	2	2	2	2	2	2	2	2	2	2	2	2	2	2	2	2
Minocycline	2	2	2	0	0	0	0	0	0	0	0	2	0	0	0	0	0	0	0
Gelatin	0	0	0	2	2	1	1	2	2	2	2	0	2	0	0	2	0	0	0
Glycyl-L-Proline	2	2	2	2	2	1	0	2	2	2	2	0	2	0	0	0	0	0	0
L-Alanine	2	2	2	2	2	1	1	2	2	2	2	0	2	0	0	0	0	0	0
L-Arginine	0	0	0	2	2	0	0	0	0	1	1	0	0	0	0	0	0	0	0
L-Aspartic Acid	2	2	2	2	2	2	2	2	2	2	2	2	2	2	2	2	2	2	2
L-Glutamic Acid	2	2	2	2	2	2	2	2	2	2	2	2	2	2	2	2	2	2	2
L-Histidine	0	0	0	0	0	0	0	0	0	0	0	0	0	0	0	0	0	0	0
L-Pyroglutamic Acid	0	0	0	0	0	0	0	0	0	0	0	0	0	0	0	0	0	0	0
L-Serine	2	2	2	2	2	2	0	2	2	2	2	0	2	2	2	2	2	2	2
Lincomycin	2	2	2	2	2	2	2	2	2	2	2	2	2	2	1	2	2	2	2
Guanidine HCl	2	2	2	0	2	2	0	2	2	2	2	2	2	2	2	2	2	2	0
Niaproof 4	2	2	2	2	2	2	2	2	2	2	2	2	2	2	2	2	2	2	2
Pectin	2	2	2	2	2	2	2	2	2	2	2	2	2	2	2	2	2	2	2
D-Galacturonic Acid	2	2	2	2	2	1	0	2	2	2	2	2	2	2	2	2	2	2	2
L-Galactonic Acid Lactone	2	2	2	2	0	1	2	2	2	2	2	2	2	2	2	2	2	2	2
D-Gluconic Acid	2	2	2	2	2	2	2	2	2	2	2	2	2	2	2	2	2	2	2
D-Glucuronic Acid	0	0	0	0	0	0	2	2	0	1	2	2	0	2	0	2	2	0	1
Glucuronamide	0	0	0	0	0	0	0	0	0	0	0	0	0	1	0	1	2	0	1
Mucic Acid	2	2	2	2	2	2	2	2	2	2	2	2	2	2	2	2	2	2	2
Quinic Acid	0	0	0	0	0	0	0	0	0	0	0	0	0	0	0	0	0	0	0
D-Saccharic Acid	2	2	2	2	2	2	2	2	2	2	2	2	2	2	2	2	2	2	2
Vancomycin	2	2	2	2	2	2	2	2	2	2	2	2	2	2	2	2	2	2	2
Tetrazolium Violet	2	2	2	2	2	2	2	2	2	2	2	2	2	2	2	2	2	2	2
Tetrazolium Blue	2	2	2	2	2	2	2	2	2	2	2	2	2	2	2	2	2	2	2
p-Hydroxyphenylacetic Acid	0	0	0	0	0	0	0	0	0	0	0	0	0	0	0	0	0	0	0
Methyl Pyruvate	2	2	2	2	2	1	2	2	2	2	2	2	2	2	0	2	2	2	2
D-Lactic Acid Methyl Ester	0	0	0	2	2	0	2	2	2	2	2	0	0	0	0	0	0	0	0
L-Lactic Acid	2	2	2	2	2	2	2	2	2	2	2	2	2	2	0	2	2	2	2
Citric Acid	0	0	0	0	0	0	0	0	0	0	0	2	2	2	2	0	2	2	2
α-Ketoglutaric Acid	0	0	0	0	0	0	2	0	0	0	0	2	2	0	0	0	0	0	2
D-Malic Acid	0.	0	0	0	0	0	1	0	0	0	0	0	0	0	0	0	0	0	0
L-Malic Acid	2	2	2	2	2	2	2	2	2	2	2	2	2	2	2	2	2	2	2
Bromosuccinic Acid	2	2	2	2	2	2	2	2	2	2	2	2	2	2	2	2	2	2	2
Nalidixic Acid	2	2	0	0	0	0	0	0	0	0	0	2	0	2	2	2	1	0	0
Lithium Chloride	2	2	2	0	0	2	0	2	2	2	2	2	2	2	0	2	2	0	2
Potassium Tellurite	0	0	0	0	0	0	0	0	0	0	0	0	0	0	2	2	2	2	0
Tween 40	0	0	0	2	0	0	1	0	2	0	0	2	0	2	1	2	0	2	1
γ-Aminobutyric Acid	0	0	0	0	0	0	0	0	0	0	0	0	0	0	0	0	0	0	0
α-Hydroxybutyric Acid	2	2	0	0	0	0	0	0	0	0	0	2	0	0	0	2	0	0	0
β-Hydroxy-D,L-Butyric Acid	0	0	0	0	0	0	0	0	0	0	0	0	0	0	0	0	0	0	0
α-Ketobutyric Acid	0	0	0	0	0	0	0	0	0	0	0	2	0	0	0	0	0	0	0
Acetoacetic Acid	1	1	2	0	0	0	1	0	1	0	0	2	0	1	0	2	0	0	1
Propionic Acid	0	0	2	0	0	0	0	0	0	0	0	0	0	0	0	0	0	0	0
Acetic Acid	2	2	2	2	2	2	2	2	2	2	2	2	2	2	2	2	2	2	2
Formic Acid	2	2	2	2	2	2	2	2	2	2	2	2	2	2	0	2	0	1	2
Aztreonam	2	2	0	0	0	0	0	0	0	0	0	0	0	0	0	2	0	0	0
Sodium Butyrate	2	2	2	2	2	2	2	2	2	2	2	2	2	2	0	2	2	2	2
Sodium Bromate	0	0	0	0	0	0	0	0	0	0	0	0	0	0	0	0	0	0	0
	0	negative results
	1	week positive reaction
	2	positive results

## Sheet: Tbale_S3_COG KEGG Categories
Supplementary TableS3. Number of genes associated with general COG and KEGG functional categories. The total is based on the total number of protein coding genes in the genome.
COG Category	CFBP3291	SF142.2	CFBP1520	NCPPB2795	Ecb168	NCPPB2793		KEGG Category	CFBP3291	SF142.2	CFBP1520	NCPPB2795	Ecb168	NCPPB2793
RNA processing and modification	1	1	1	1	1	1		Carbohydrate metabolism	262	264	263	262	262	262
Energy production and conversion	211	210	209	206	204	211		Energy metabolism	148	152	152	146	147	147
Cell cycle control	50	51	51	49	48	48		Lipid metabolism	63	64	64	63	63	63
Amino acid transport and metabolism	416	417	414	408	405	409		Nucleotide metabolism	95	95	95	95	95	96
Nucleotide transport and metabolism	105	104	104	103	105	106		Amino acid metabolism	203	199	197	203	203	203
Carbohydrate transport and metabolism	376	372	372	366	371	371		Metabolism of other amino acids	67	68	69	66	67	66
Carbohydrate transport and metabolism	218	224	225	215	214	216		Glycan biosynthesis and metabolism	77	78	78	76	77	77
Lipid transport and metabolism	136	140	140	132	133	132		Metabolism of cofactors and vitamins	177	180	180	177	178	181
Translation	259	266	266	253	261	257		Metabolism of terpenoids and polyketides	35	37	37	35	34	35
Transcription	324	329	329	307	314	312		Biosynthesis of other secondary metabolites	55	56	54	55	55	55
Replication	164	166	170	146	153	152		Xenobiotics biodegradation and metabolism	41	46	46	41	41	41
Cell wall/membrane/envelope biogenesis	248	251	250	246	244	245		Genetic information processing	201	209	210	199	204	203
Cell motility	77	79	79	75	73	72		Environmental information processing	462	460	457	458	450	460
Posttrans. modification	174	184	183	172	177	173		Cellular processes	257	263	260	257	264	254
Inorganic ion transport and metabolism	262	266	264	255	257	258		Organismal systems	40	41	40	39	41	39
Sec. metabolites biosynthesis	71	88	81	70	71	74		Human diseases	105	105	107	103	104	103
General function prediction only	243	249	248	229	242	237		Protein families: metabolism	264	266	264	264	264	268
Function unknown	153	157	157	148	153	145		Protein families: genetic information processing	617	639	640	612	622	614
Signal transduction mechanisms	214	216	216	207	207	207		Protein families: signaling and cellular processes	929	927	925	919	916	921
Intracellular trafficking	121	127	127	126	115	122		Unclassified: metabolism	200	214	213	196	201	202
Defense mechanisms	104	95	94	99	91	98		Unclassified: genetic information processing	55	57	60	46	52	54
Extracellular structures	39	40	41	38	39	37		Unclassified: signaling and cellular processes	75	77	78	75	77	75
Transposase	113	97	105	85	91	86		Not annotated	1610	1413	1411	1198	1246	1135
Cytoskeleton	3	4	4	3	4	3
Not annotated	868	666	665	539	570	476

## Sheet: TableS4_Unique_CDs
FigureS4. List of CDs unique for each of P. betvasculorum strains
CFBP1520	CFBP3291	Ecb168	NCPPB2793	NCPPB2795	SF142.2
>unique/3453/1/Org1_Gene926	>unique/4663/2/Org2_Gene1248	>unique/63/3/Org3_Gene2758	>unique/7/4/Org4_Gene2796	>unique/99/5/Org5_Gene4419	>unique/4363/6/Org6_Gene1029
MPLTDTAIRNAKPLDKPYKLSDAQGLYLLIKPNGSKLWHLKYRFGGKEKKLAFGAYPTVSLASARKLREEARTILSAGDDPGVKKQHDKQAKKNGNTFETIARQWVTANIRWSEAHAAKVLRSLELHVFPLIGNVLVTDLKTANLLIPLRVAEKKGCLETAARIQQRTTVIMR	MSRSAFTLSERTVSLVNDYTVADIVFGITQNFGEHALRHSDLKTLQMKRPGTSPAGKTPAGGKNATAVAG	MTIRIYPSRLPGEPLETHEHGNITLHYWFLRNVRGWQFEMNHPISVEIGGQPVPPEEWPLCVIKPDCDVRIYPVAYGLEAATIAWIAVGVAVASATYSIFMMSNMDKNSASSANGDSLELNPAKANTAKLGDPIREILGRYKVYPDYVVQPISRFDSDNPRIFRTNMFLCVGVGDLSISQSGIKIGATPISSFGDDVSYTLYAPGANVSGDPRSENWYHSTEVGNTNSGTSGLDLGSTGPETTSINADAFTVSSNSISIIGASSEDDDDDDDSVIPAAWVVGTVLTVDAPATFTVATENGSSVIYGDLEEINPSVGMPITLEYNNSKYNLFIASYTPAVAAVPGVGGYEASITANAAPATYDFTDSNVIFSITYGGTSYTVTLATDYVTMSGIVLAITE…	MKMNPRAWFNRSRIPMNSAENVTFSANDPASENTPRSELFSTAQMERYGQKLARTHKLSPNKHPYYLLKRLGDNEAVITQNCYEFNAGKKTSIMPAGEWLLDNYYLIEEQIRTVRQHLPKSFGKGLPSLISPLNCPRIYNIASEAIAHSDGRWDATSLTSYLTAYQQVTPLTLGEVWALPGMLRLALIENLRRISIEVIKAQQDRNLADTWITRIFECAESAPGDLIMVVADMARSRPPLTSAFVAELMRRLQGHGNALSLPLTWVDQCLREQGITTDVLIHSFNQQLAASQLSVSNSIAGLRLLSETDWADFAETISVVEQALHNDPAGIYRRMHFNTRDHYRHVVESLARDSGLSEPEVADRVLVLSGKSTPDTPEHHVGYYLTGEGRQELEIHLLA…	MAKLLKAMKRPAALWGVPMVPLLAVTGVTIIVAIWTSVALLFLLPVQFLVMKSLTRNEPMRFNLIAVWLRAKGNPVANRLFGATTFMPVEHDDVDIKEFLDAMKLNQCATIKKYIPYSSHIHQHVVRSPKSDLYCTWELMGTPFDCESDESLQFGTNQLHGLIRSFEGMPVTFYIHNDRNTFTDNLHKNSGNPYADEVSRLYYASVGVFRRNRLFLTVCYRPFVSLEKAEHKRMKDSQKLKELDGALLEMLEIKSTLDTALSRYGARPLGTFTEGSAVFSSQLAFYEYLLTHQWRKVRVTRTPAYDVMGAAALFFSAESGQINHANGTQYFRGLEVKEFSEETATGMMDSLLYAPCDYVITQTYTCMSREEAKKAIKRTKRLLMSADDDAVSQRLDLDV…	MGGTAIRFGEDADALAVGCNIERFELGLGLDSRDVRFPLVSGDIAPIAAGVTPQKLERFFGAGTNQAIDALADDQRPDGELQLVDVGVNPDRRHR
>unique/4293/1/Org1_Gene4664	>unique/4852/2/Org2_Gene809	>unique/113/3/Org3_Gene2960	>unique/57/4/Org4_Gene496	>unique/1107/5/Org5_Gene4426	>unique/4837/6/Org6_Gene1274
MASIRIDTYIHQLQFPIGALIISQGVDRLIRAGTEEPFQFLRRHARGDWGDVPADQWEANIAGIQSEAKLESFYVATNGQRIRIFTEADRSATHIVLASEN	MEAAKASAASGTRHWWPEWQSRTPKVSRSDTVSAKQPQVKERRQLSAPCRACNKVT	MNKIKMNPFVIFIALLGFLLMTQTAHAADLFTVPETDKSKLWFLDVLFPENLAQSPLANTMTILNSSVLLVGGILAAYTLIAGTMSTAHDGEMLGKKWSSMWLPVRTALGTAMILPAAGGFCAAQVMVLWMINQGIGLADTVWNTYAANPSDGAVITTSASYQELDRIAKTAFINNVCMLKAGELWNKSAANDLFPHVTPQFSMTSEKGQYLYRYNYGANNAGNDMNKNLLVSKAACGSITLTDPEAKAAYDEQAKAQAQAAIAAGGMYMAYMPQDIKTNISGIVESHNTAFIALNNSMKLLAEQYVADNNIDIQNGINGATANYVSVIDSAVRAAFSTGDQWDDFKENVQKDGWFMAGAWSMKLIRVQDAINGAAHNLPVAGQATMEYGDIFDNSLNA…	MLKRLLSKLTGNRQQIERHLKNKYQIEENGLNFPLSLVDDSQLWALASWLEQLAEEDYLISLTDRWLLSWDALYRLLEDEEHASSLPLIGIPEILPLRASLSSRGALSDRDFRVWIAEWVTLPARKPIRFSRTGAILTHENQQHLVSRENWALLQATEQLSAQQDQTPGETTNQLGWAAIRKCAKQAAAKFDDYLEKTHVVKPTSLSLRLRKSTVADTAVIEIEPHFEDQPANWLGSFDKNSQVHDSYRIPGENGELSHVIIPPEVKEVLNSIHSIPGRRVAGSEALSFVRNPYTFLGEDAANVIAPEEHEQALFDARIFFHHFRLIPQQNAENKIEEVTLVLEPVSPVPQPEVTFVFSAPWELEKFIQQLGISVAAQMPAGSWQGYELELSQFTEQQW…	MNDENKVPVPDEVQSSPAHAEDDIATLEREARAKREAELLNAQDDEEKDPVQPAVNKLKKRKRGKATAFLAIVAVALIFLAWGGNWVYRNILWQPTEEKKQDTAPQTNKTDYRQRNDLGMSTDTAEEEPEQQDNGQISTGGTGQTAPAAPPELNKASFLIRRDGSATTQNQVKTRQQEMTLTSAITTGQQDSSAATPPGQPQNTAAPSPGQSPAPVRRIPYNPDLYIPENTSIPCSLDRRFVSDRAGKLRCTVTTDIWSASGNTKLIEKGTTASLLYRAIAEEGMKHGQGRAFIIATKLRTRQPPYLDIPLVDTSAAGELGEAGVDGWIDSHFWERFGGALMVGMIPDIGAWASNSAGKKDRNTDYTENSRQAMADMARTTLENSINIPPTLYKNQGEI…	MFFLVTRNQKGENLKSFYSKPRGLQPNAVHLSPLLGETQGEVSAGTPHPCGRTVYLHA
>unique/4722/1/Org1_Gene2955	>unique/4910/2/Org2_Gene2473	>unique/146/3/Org3_Gene1307	>unique/64/4/Org4_Gene488	>unique/1534/5/Org5_Gene4422	>unique/4866/6/Org6_Gene3472
MDAQRQVQRHRLAISGTADVVRSTTATLAACDTRCFILGANSEICHHHNTGYKNSIKKIIAGLDD	MVALNAAATQEKSIARHGEIHALSQSCVGISPQIRPVFSCELPRYGYNARL	MLNLAEYRQRPALLADWLPWAGLIAPGVVLNKDGCFQRTARFRGPDLDSATQGELIATTARLNNALRRLGSGWALFVEAERQSAADYPHSDFPEPLSWLVDEERRAAFEESGNHFESAYHLTLAYLPPEESRARAAKLLYEHAPGDGVDWRGRLDAFVAETDRMFDLLDGVMPEIAWLDDAQTLTYLHATVSTRRYRVGVPEVPFHLDALLADSALVGGLAPMLGDQHLRVVSVRGFPTSTWPGLLDDLNRLGFAYRWSTRFLCLDKAEAEKELGRLRRQWFAKRKNVIALLRETIFQQESPLVDTDASNKAADADAALQELGSDQVAFGYLTATVTVLDTEPAVADEKLRMVERVIQGRGFVTIPETLNAVDAWLSSIPGNAYANVRQPIVSTLNLAH…	MLSEDDLEQQSLKWFAELGWEVLHGPDIAPDGNHPLRTSFHDVFLRPVLLEQLQKINPHLPFAVLEEVILRIARAQSPDLVVSNKAFHHLLLDGVPVQYKQGDKIIHDKALLMDFNYAKNNRFTVVNQVAIQGAKQVRRPDVIGYINGLPVAVIELKSPIDANADIWTAFNQLQTYKNELSDLFICNEALVISDGYNARIGALTANEERFLPWKTLSNEDDKPLFEWQLETVVKGFFNRELLLDYIHYFILFETDGNRLIKKIAAYHQFHAVREAVAATIVASTGKHLSLRSNITPGSKKAGVVWHTQGSGKSISMCCYAGKLLQQAEMNNPTIVVVTDRNDLDGQLFATFCQAQDLLKQEPLQANDRDQLREMLNARESGGIIFTTVQKFAPLDNEQA…	MSGGVFVGVEKHLIGGITDATKGLMMSYSSMMMGLAVASATIYIMWRGYQTLAGKLSTPMEDTMWDIMRMAIILSFVANLGGYLDGVIDAVNGLKEGFSGSDNIWQLLDSLWNNAKVLGKTLHDMDNSTYIKDEGMAAQFYVWLGIFALMIITAFVSMIAEVMILLLSITAPIFIFCLMYGFLRPMFNNWLQNIFAAILTILLSSLSLRIVVNYLNSRLALATQGAAQANIVELGAQVCLAGICAAILVYLSAKLAAALAGASATVSMQGLAAVGLGAAVFGGSKLVNGTQKQTRRSIQDNIQGWKDENAGKPGKPGGELGYNASKARKYAIEQMIARNEARRLAQSRESAFKKFNS	MSETERKIHFWIRLFYLYDISGDKPFIDKAIFRGCSPVFVDSRLQVYIKIRSGSQ
>unique/4727/1/Org1_Gene1269	>unique/4937/2/Org2_Gene2982	>unique/150/3/Org3_Gene2763	>unique/75/4/Org4_Gene132	>unique/2071/5/Org5_Gene4425	>unique/4878/6/Org6_Gene3914
MREGKLAVGKSATERVDHHTVNAERRSPVQFQDIWFLEKLAQFDRETNANHQRIKIGSSFHVPDK	MCYLRAFDNAQRLTHFVTDIAFRYEDCRPRRELSVIGPVGCVLLSAGKC	MAQPVGDLVVNLDVDAAKFTEQVGYVRKQLSGLDTAANDAGNKISQSLSKQELAAKRAGMSVGQYSNAMRMLPPQFTDIATQLAGGQSPFLILMQQGGQVKDMFGGIVPAVKGVSAYIAGLVNPFTLAAGAVGVLTYAVYNNRKEIDAAAKIVQSSLGVSGDAAQRLALNMVAISEKTGDAIDDVAKMFVTTNDGATEAFNKLLSVGYSYDEAKQKVENYKASSNFTALNVDIDQHRREVLKIGDAWSDAAIKVKNYYTAADKGKQSVALGGAIDPIVGVLEQAKDLQKTVNDLRIKGNLEVKKTVDWINKEYLATDRVAGAESRLKEARDQARKISASGDADAISTANKLIAAREKEVEEAKKQANKKPKEKAYSEDAGQRLLDQINQQTAALQQQLA…	MNHHSQNTGFQFDSQQQYQLDAINAVVDLFDGQPKDADKIAIALRGSVASREGELDLGIEQEIGAIGNNLVLDEGTTLANLQTVQDRNGLEVSEKLVDDKLDFDIEMETGTGKTYVYLRTVFELANKYGFTKFIVLVPSVAIREGVNTSIRLMREHFRSLYPAQPFDATVYSGDRSEEVQAFATATNVQILVMTIDAIRGDKNTRIIHKPRDKLNGLRPLDYLKGTHPVVIMDEPQNMESLLSQSAVGELDPVFTLRYSATHKQRRNLVYRLDPVDAHDLGLVKQIVVAEVAQHGADVAPYVKLLEVKDTKAAKLELACRKADGSIARRSKKVKPHQELSDVTGNPAYAGWRINALSIAAFGEPASIELTPNGNLLHEGESLGGATGAIYKEMIRETVR…	MKKLTFSALALMMCGAAWGAAIPQASRYDSRVQQVIYNPQNVTVVNTKPGFMTTLVFDNDEAVISAKPGFDEAWEATPDANRVNVRPLALTQGAPGEDGNTTQVVINPNSRDWHTNMLIVTNKRLYNVELNVIDDKSAQQPAFQVSYRYPGEERDKASREATARQREWEQKQQQASVQKALNSAQTPRNWSYTKYPGKGSFNIVPDFAYDDGRFTFVGFSPSKSIPSVTKELNGKEHVVNSSIQKKGDFTVLVIQEVTPRLVLRSGNAVVGLENSGFGKVHAADGSTVSRQVERVEKPESN	MNSPELMNSLERMNSPKLSAMHYSRFHDDFPLHPHATFHICEYARKMLVAYTAP
>unique/4767/1/Org1_Gene682	>unique/4962/2/Org2_Gene3348	>unique/235/3/Org3_Gene2774	>unique/116/4/Org4_Gene130	>unique/2603/5/Org5_Gene4400	>unique/4902/6/Org6_Gene933
MERNLSIVEELSECVKDFNLKQAVMAFFVPYGIRLRILYAISSYFLNVRYTLINHAREAEEDE	MTRSRRGTDFRRVHAAHPAVTLTSAEFLTPVENQHLLAHRYYFLLLAL	MESQATASAIRRNMAGILKAPRRMPVAEAVEKYMRVPMGAGNSVPWDPGVAPYVIEPMNCLASREYDAVVFVGPARTGKTIGLIDGWSVYNVVCDPSDMLIVQMTEEKAREHSKKRLSRTYKLSPDVARRLSPRRNDNNVYDRTFLAGNYLKIGWPSINIMSSSDYKCVALTDYDRFPEDVDGEGDAFSLASKRTTTFMSSGMTLVESSPGRDIRDTKWKRSSLHEAPPATGIMSLYNRGDRRRWYWPCPHCGEYFQPVKDVVAGYQDIPDAVKASEAAYIACPHCAGKITAAQKSDLNKRGIWLREGLKIDRHGVITGESRRSRIASFWMEGPAAAYQTLSQLVYKLLSAQQDYEATGSEETLKAIINTDWGLPYQPQSSIEQRKSETLMDRAKRVVK…	MVKPTITQVRQGSSRNIAKEPGQVGIKNKLWFQSAGEGEDLETLLNQCVDDLVIAKNKIRFVLVTDFTRFLAWDTASKERLDVELDELHSNYGFFLPLVGLEKAIISSENPADVKAAEKMGRLFDLIRVHNDLSKSEDIHALNVFLTRLLFCLFAEDTGIFALAQFTSAVKSFTEEDGSDLDSFLYQLFGVLDEKPDSPQRQRLPAHLTAFPYVNGGLFASDEPVPELRKKGRKILLECGTMNWSEINPDIFGSMFQAVIDVEQRSRLGQHYTSYRNIMKVIQPLFLDPLRVELDKQRNNAKGLKALLVRLGKIKVFDPACGSGNFLIVAYKALRNLEIEVIEALRKLEPQTFSMSGLHLSQFYGIEIDDFACQIARLSLWLAEHQVNSQWEKAFGFAP…	MLIHNVAERKEAANRKMLALLTFLKEETYSDFKTLKKVVGFKGKSHRPTYALLNKAVALGFLIKHEYPVIAGKKSLWGITMQGLAMVVKPDDKVFPGYFEPGKLKYWTLEHRLLNHRVRIALEEKGGQGWLNGDRGEFIARYPGVRHRPDGIITLDSGAIVAVETERSMKTRARYINIINSHLSASDAGRWHYAMYVMPDDKTKTSLIRLFDSIKTVMRNNVPVPFDTKNREMFLFRTIDELEQAAASGGQ	MASVSIFWCWSARESLKRIELMVKCKIDYCGALPIKQIIAILLTDFYAKNT
>unique/4786/1/Org1_Gene460	>unique/5021/2/Org2_Gene2491	>unique/244/3/Org3_Gene1339	>unique/202/4/Org4_Gene493	>unique/2815/5/Org5_Gene4412	>unique/4953/6/Org6_Gene2756
MPDVPGGGLHLTVAVFDKTLTHWQGKDLYQPDAARFVTVEGWHIPVHGRHPLSGFLPLHSVG	MSTQRISTEEVAAIFSPSIGVASFGSGATSAVALAAGFPLMLVTLA	MNAITQTEARALNTAAAIPLEAADPTKNLILVPLSRLVSRPAGRNVRKTPRMSIPELAASIQRVGLLQNLIVIAAADGEHYEVVAGGRRLAALKLLAKKRRISKEWEVPCLLVADGTARTASLTENVQREAMHPADQFEAFAALVAEGRPIEDIAADFSVTPLVVQRRLKLANVSPRLLADYRAEAVTLDQLMALAITDDHAAQETAFYDAPTWQRNPSQLRDRLTEREIDAYRHPLVRFVGLDTYGAAGGGVRRDLFAEGDAGVYLTDAALLERLAQDKLAGIAAEVKDEGWAWVDATPAVTHADLHAFQRAPRERREPNKREAQRIEKLQTKMHELAAAVDDALDTEDEEKADALQEEGEAVGEQLQALEDGLQDYGTTVKAAAGAIVTIDRNGQAV…	MSWLNSLLVTLTSVEPHKVPVTVIGLVSFAVVCFIFFYLIRAIRIVNGLKKYTQSIISVENNAPEAQLEHLKNLFQRPGLRHAWNEFEESLHPQHELSNGEEKILRIRATAPSASFFSEQQLIDIPLNTEFFKHLPGILTGVGIIGTFYGLMIGLNHFDPSTPEQVTSSVNNLLHDVLYAFLGSAFAIFASILVTWLEKLSIAKCYKYLEKFTAALDSLYDSGVGEEYLASLVKSSNESATQARHLKESLVTDLRDMLLQLTENQKVENERLANTLSTTYRESGAQFAEQVSGAIENSLKSPLDKIAGAVQTASGDQSGMVQNMLQDVLTAFMAKLDTTFGQQFTNLNEMMGQTVGAIQTMQNGFATLLQDMRQVSDDSRQGSAQLIEQLLSEMKSGQQ…	MTDKSLSLKSSVSPTGVAKQSPCYNVASRKRRRFLNRWIKSLATEAGRIKIKNELRRRIRHNRYWVNEANKFGLEALCELMLAILDDLDLRDWQTIHNLETLAERAGLSTRSDAGHRSISRASRGCDRLSWLNAIISEKAPFNPYDARCACKHIEVTEDFFAILGIPLKQVYRERARLLKADPEEIIFSGDVRLIAIKVENWTRKAAAGLARMKAKREVARQRKREYYSPTFA	MNTVIKNMLLKTVLTLFLKSVNWSATAAKFQFAVIVKITNMFFNQCFLR
>unique/4813/1/Org1_Gene432	>unique/5029/2/Org2_Gene2590	>unique/281/3/Org3_Gene2757	>unique/239/4/Org4_Gene133	>unique/2878/5/Org5_Gene4424	>unique/4971/6/Org6_Gene2635
MRLQGKITICSLNWFYTYALDCINQPVQLCFLGFNSLIYSLNKFSCDIEPLIFVISWTLI	MIVVPTIKLSQSGVLCQMAKLTSKPAGTWKLFIMLSVPASTWVAP	MTTYKTGNPLGSSAAKDLFDNAQNLDLAMNDLVMYWVDRLGVQRITEYGRQQLFNQLLENIKEKGDEAVSAIGWQELGEWAAGLQITNKNQIVSYNNGWYKYLGDLPHTIAGDSPDEDGGVWSSSNTSGMWVNIGDLAFRANLASLTGSSMIGGLGFITPEMFGAKGDGMTDDTAAIQAAINAALHSSYKMKVVGMGIYALSSSLAVDNFGRGFCLDLAGLTILTAFPAYSNWKDATPAILIGASSNGSQVGLEISVGYFNGSDKATLYRLSGYGAGGSCFHAGRVLNAVGVYQVGDHTLSSPSASNKVTGDYWYNGIFGVRVKRNGSFIAEGHKIQVNFMTNLKYGGVQLFNGAQYFQIYGTDIDFCGKWLCELTVNNLPSSDPRGLSVQRAGVLYET…	HRIISMANERITEHSAKQKENAESSCSIDVLAERRQDESCSPLHNDLFDIPSSTPNFRTELAGQLAELIPEAVADGKLDVEKLRELLADDVVDSNERFGLFWPGKKRALRAAQAPTTATLKPDFANSKDWDATQNVFIEGDNLEVLKILQRHYHNKVKLIYIDPPYNTGNDFVYPDNYREGLDTYLEWTRQVNEEGKKVSTNSDTEGRYHSNWLNMMYPRLKLARNLLTDDGVIFISIDDHEQDNLKKLCNEVFGERNFIAQLVWEKKKKGAFLSESSTNIKEYVFVYSRSVSNFNGLIGEIARNVETYPVIKTTNSRGVRLIKKGIPSRFKSKNHILPSGSRISSGNMEMILLSDLIIKDGFLAEDVKVDSNWIYSQKLLDSYADEKSLYVTQDLYFR…	MSEQKLIAESRTFEQQMIERDKRATKAGFVVGGVGLLIAVLALVAVVVMLPLKQTDVELYTVDNHTGRVEHVTRTSKTSLTATEAYQKAMAANYVKVRERYVYPSLQDDYETVQVYNAPQVNDDYLALYAGKNAPDKVYKNGAHTVKVEILSNQITDATAPDRVATIRYKKIIRRLADNSTRNEYWDARFTFHSDPDKEMSDAEREINYFGFTVTSWQTDREIRGGE	MPGNAWEAQAYDKCNREQTADGPRKWDQVRVKGCGKSAPRDWQQFVAR
>unique/4822/1/Org1_Gene2703	>unique/5049/2/Org2_Gene2080	>unique/285/3/Org3_Gene1325	>unique/270/4/Org4_Gene129	>unique/3006/5/Org5_Gene4404	>unique/4992/6/Org6_Gene3608
MSVNNLNFKIRKVINNFPLPCSVSKRGNFFYSKVFRVRWQSAPYSLETNQQFEFFHTL	MRTLHPLVSIQTRLIRDLHYILLSGMTRGLPPEYSISMNHGENG	MTDRRDDDFRVRPSAPKNRGKGQGQSFVSKVLKQAGKASSGKSAVRRPGAAGTGQRPGSRLGRGHTAARFAGAKLTPMSRRVTIKTLLVNHQRASPQSLAKHLRYIERDGAGRDGEAGRAYGPQTDTADLDAFKERCADGRHHFRFIVSPEDGAELDDLRTYTRHLVDRMEADLGTRLDWVAVDHWNTDNPHTHLIVRGRDDTGKDLIIAGDYIAHGFRHRAAELATEWLGPRTELEIQQALGREVEQERWTSLDRTLQREAGEDGRVRLERFNDPRLQRQRLLLIGRLQRLQRLGLADETQPGSWAIHADAEKTLRALGERGDIIRTMQRAMRGEPRELAVFEPGDDARTIVGRVAAKGLADELHDRGYLVIDGVDGKAHYVALNARDELANYPTGAV…	MNNVLQVEYGQTGQSTSLNLMGMREMQARAFAERNSQYLLIKAPPASGKSRALMFLGLDKLENQGVRKVIVAVPEKSIGGSFQDTCLTEKGFFADWRVTPENNLCVDGGEAGKVQAFQRFMSGKARILICTHATLRFAFDKLLVTDFDNCLVAIDEFHHVSADGDNRLGNLIDELIKKSSAHIIAMTGSYFRGDTVPILLPEDEALFTKVTYTYYEQLNGYQYLKSLGIGYHFYQGRYIDALPSVLDTSKKTIIHIPNVNSGESTKDKYGEVDSIIDVLGNVIKRDSLTGVYHIAGKNGCEIKLANLVDDNPNERSKIQAYLRNIKAADDMDIIIALGMAKEGFDWPYCEHVLTIGYRSSLTEIVQIIGRATRDCMGKMHAQFTNLIAQPDAQDDDVKA…	MTAVIALANGKGGVKKSSMSRAIATEYTKAGWGVLGLDMDIDQGSFLDWGQRRLRNGFEPPVTIQGCGTVSQAKKQIESGQWDLIVIDSAAYATKSLLSLIDIVDLLVLPTGFSVDDLRTTVTTVNALRNKGHSTDKMAVVFAGVSESESEYRAALEYLQPCGVPVIPGAIPFLTSFSQAQDKGLALTESPFPGPRQKADDVVQGVIDRLTTLTQ	MVIVDHYGGLASATAHSRGYITEEIEDAKCTIALDSALLSMSLQEAK
>unique/4827/1/Org1_Gene1310	>unique/5218/2/Org2_Gene1671	>unique/347/3/Org3_Gene3519	>unique/286/4/Org4_Gene119	>unique/3007/5/Org5_Gene4405	>unique/5044/6/Org6_Gene4440
MTQQTKLKMLLMFWGNRLARIAKIAPVFYGGLSLPTALRAAASGVKNCSRQFFMFTMY	MLVTPGADVRAIEFHLKLSMRIILDITVITITLRAIVFI	MKENSIGKNVLFFKPKRELDAETNLNDFINFCKNDLNPSEIGINWELAHWEKIFTFTKINLRGIKSRYIREEEKLDKNFIDFAKSYVLYHYLINSGKINKLTFTGVIRALEKKLMQINGNGNIKYLNITILNECIECFKERYSKEVAYKCGCELQKTVIFLNEHGLLNVGYLSWSNPLKALEADNVISKKADLNRLKKLPDERAINAIGEIFSLPDSALSDNDMFITSVFALLMCAPSRVSEILALPADCEVIELDRHGKERYGLRFYSLKGFGGNVKWIPDIMVPVAKKAIRRLLNLSKNARELAKSLEESDTEYHQCNQLPKSFPWYDKEKRIKYSNALCCLNKHQLSVAKRTSSVLFKPTAAILVRNLGFSEYARKNSIKNIFEKHGYLDEKGNPL…	MSNYCFYSQDALTLAQSSGIDVLINNYADQYKKQTYILCRPLSNEDVKYDYDQAIAVFSSGIKPFFIDIGNDSGLFEEYQEDFLEDVSFLAEKFKYREKIGRKKSWQSLFDSLPMDDLDFSKLEVETKESRVIDLIISLIVGSINDTSRINLEASNLLDTIKSKIILFDTDQTKFVFQSGFGKKSVIQGLAGSGKTELLLHKLKEVYSKNPDSKIAFTCFNKILASTMRTRIPEFFDFMRVEKQIEWGTKLFCFNSWGLTRDPFSGMYRYICHFYEIPFGGFGNGDFDALCKKAIVDINNSGRSDKKALDYVFIDESQDFPQSFIDLCEMATSKKLYVAGDVFQNIFMPINDNVNRADIVLKKCYRTDPKNLMFSHALGMGLYEEPVLRWLKAAEWDSC…	MRTVHQLLCLAKSWKNGGFCIAGKNDDNQWVRTITANPSNNAIFHHGNAIQPLDFFQATTINHAPQGHQTENHIIDESVIFTVNGHCAADDLDDYVDTPATLWGTGTSSNYGINDKIIIGQRVVNNSLYLIKPDDTVIVQMQNEYGTDKLRIRFSYNSDEYLLTTTDMGIQNYFREEDNRLNDGEEEELDGVSYLTISLAEPLNGGLYKVVAGVF	MNLFDSTAFFSSHSNIINLAQDNNVDQSMKMAPVRKHGFGSKEPT
>unique/4877/1/Org1_Gene478	>unique/5236/2/Org2_Gene2364	>unique/387/3/Org3_Gene1353	>unique/339/4/Org4_Gene2084	>unique/3291/5/Org5_Gene4408	>unique/5047/6/Org6_Gene1610
MITPHKRSLIAVTLLLAGAMAPTYTTPKSPITEQWKSDRAAQHSSITTNWKTFI	MFPAPVEPNPASGWRDGGLRVSIKARHVCTHPNGVVLCQ	MTGIQGLTAEQEAFAAHVGGAFVHACPGAGKTRTIIARLARIVATLPPRRGVAVLSFTNTAVDEFRERCQAAGLDALLKHPSFMGTLDAFVRRFVVLPSCAATSTTRPIILDSWDTLGIEIRLSGQFAFRGDPVSLDLFDPETNVIDPAKIGHAGLQNHVRQHQARYQQAAAIRRRGLLQAGYLSAGDARVQTLRLIRDPVHGGPLVRALSARFHEVMVDEGQDCNPLDLHILSWLRANGVHVTFVCDPDQAIYEFRNGNPAGIQEFKETYPVESHRRLTGNFRSSPAVCQLAATLRDAGQVDQSVGDTANVEHPILLLTYGGRGPTATIGQAFLDRVAELGLDSTDAIILAHSGKVAQRAAGTAPNDSNGSSRIESLARKVAEFWSPTATARSREAVV…	MFFSQSAVLNAIMDLKKVHPFYGITFLVCKKNKLPIGTSQEFALNAKNKCFLEQVHKIAPHSEYFYQPFRYKTSREWLNNDYASSGLQAINTQTFSDAFIHTKSTPQWGWADNYLQVLKDHPSIKKNKISLISLCIWLYKFNDFPQNTSCQSIISTFTQEYNISDKELEELFTFEESNTNELFDDECINWDKVRGMLSLPPDSKPENGGTLSLLSIENIGPAKKLVIEPKTRLNIITGDNGLGKSFILESAWWALTNTWTDRVAYPDPRLRGKNINLTYSIQGNGEFKSGNCVNFDWENFNWPIQTDRPTIPGLIVYAKVDGSFAVWDPARKYSTQSTFNEKEKLLFKSKEVWDGQDGIGVLEGLIRDWMTWKNDSKNQHFKHFEKVLEKLSPPDLGVL…	MKKPQRPYDRELPADADYKMEWLYNRDKENFESTDKWIYLGADAQNPTFAKVGITMGDLVSRSYSSANPNFYLFCAFQCVQSTTKSQLEEIERSAHCYLDQVFTKSDGSTKRVRHFESGRMSECYYDVDFDDFFQHLHDFLYENYSRFFSISGFYDADDILEGDFLNCEFNRHITLEQSNRYIRMLLR	MIGIIPIAPSDFLISGKVMPVFSHQCLSAINAFQPSMPWPPHFLP
>unique/4940/1/Org1_Gene94	>unique/5294/2/Org2_Gene3558	>unique/397/3/Org3_Gene3626	>unique/438/4/Org4_Gene492	>unique/3292/5/Org5_Gene4407	>unique/5156/6/Org6_Gene3617
MIKRLCDQWHSKQPVDERYPSLIDINGAHYMVKMVLIIIIYGIVDASGS	MHYHFGAVIVTFVIQDGVCSSSKMFCQSIKMEGAGRRV	MDKNNNITPAIQVGVDRLHEIFNNCFLIEVNAKNKNEVIRFELNLPADYLGVKRKLQIGFSEKFPSVALALSIKPSPWLEWPHILDEFVCLFGGGDKAVYGDPVEVIDNTFYRLGKLISLVCESKNISEIKNEFDSEIISYWTIQATLSQQKLILLNRPRDSAPLYTLSNSGMVGGEEIWISDSESKILEHYQWQISLSKKKIDVAKGAFYLKLTSTPNVKFPIASGLVDWLSSHADGNHIKALKGWLEKDSNHPLRWVILEVFNSEPVSIIALLIKRKGVRDNQIFNFGLRSAKKKPLENPIGERDSLLITDTFLLDNEIIFSRSKDFNVEETAQKKVLLIGAGSLGSHVASQLIHSGITDLTIVDPDTLDDSNLGRHILTIDDLGKNKSLALKKYLK…	MNNAEQQFLNELDNKFWKAADKLRANMDAANYKHVVLGLIFLKYVSDAFEARQQELTTLFSDVGNPDNIYAMSRDDYNSDEEYAQAIQNELEVEDYYTEKNVFWVPKAARWETLKNKAMLPPGTVLWVDENTGQDVKLRSVSWLVDNALDEIEKTNPKLKDILNRISHYQLGNEVLTGLINTFSDANFSNPEYNGEKLSLKSKDILGHVYEYFLGQFALAEGKQGGQYYTPKSIVTLIVEMLQPYNGRVYDPAMGSGGFFVSSDRFIEEHAGEKNYNAAEQKRNISVYGQESNPTTWKLAAMNMAIRGIDFNFGTKNADTLLDDQHPDLRADFVMANPPFNMKEWWNEKLKEDVRWKYGTPPQGNANFAWMQHMIHHLAPKGSMALLLANGSMSSNTNN…	MSVLFLEYSKEFNCFGKFQRKLNFLTENISISEIIFISDSRGFIKKFAEDKHLSTREVSSAEEAEYAIIFRDKRQDIGDFKLTKNAKVKVVLVSLTLVVNKDKGDKFDVYIGRGTIWGNPYQIGVDGDRDEVIRKFKYDFDKGFLKPFDNIEKNALSLKGKIIACHCKPYACHGDVIADYINSLDDGE	MLVVDMSVAGVSAVGVAVAAFVGAGVVPLRADICAFGAVTA
>unique/4973/1/Org1_Gene2243	>unique/5346/2/Org2_Gene764	>unique/402/3/Org3_Gene1352	>unique/465/4/Org4_Gene495	>unique/3500/5/Org5_Gene4494	>unique/5191/6/Org6_Gene3080
MEYYRRVSQSSGKGKMIDDCLREGRLWAEKYSTKQPSKTKPVTLRGKN	MNLIADWVKYRFTDCNNLQFRAVDVGKKWHDNRQSKK	MYLGGITISRFRSCDNVTVSLRPDLTVLVGENNGGKSNVVDAIRLLTLPLSGRRERYPEDEDVRRHATVPNFQIEGAFRELSDTLKGLLISAVPDPTKDEAIFGYRYEARSERAPRGKTTIWAGRFDANEPEAGSSELIRHVYLPPLRDAHQALGTGSGTRVMALLRNFLPKDQEQDFLAGVRRADDRPEILTTMNTEIGTALGLLTNGVRPQTAALDFGAESLLDVARDLRFRLGDSGLVPEDIRASGLGYSNLLYMATVVVELAKAKEADLTIFLVEEPEAHLHPQLQVLVLEFLLDQARQSASRAIEPGKPEGRIQIVVTTHSPNLTAWVSPMHLVVMRSRRRDQNGVAVSESVSVPIAEIGLKPKTLDKISRYLDVTRSALLFGNRAILVEGIAE…	MTPALNSLSQRIAARLSSSQRDDHYLRNDFHTLASVAHDMEKRFDKAESIPLPPQEMRLAALRRLRLAEELTEREWRMVFYGLADNDPSYPDQPILLEDDVFFPEVDNAIKKRLESKALKRKDWAALCSSYFAYQHESPETNLHWCVLRGHIAQGYFVVKAAIRREKSWMKTIEFYHDIFTPQAGGVISRQLLAGESNSLSALEKIAQIPDSSWLWKRIFTVLLAQLDTLDDPQFLEKISWLLGLAAQWVRFRDDIMAATLTRYYHSIYRDQAHSALKQAALACWDNPQLKSQQNKWHQYVAEPVAAMVRGWLAKQDLTHFFELLRGNDDVDQARLHYWLRFANQMGFTRIVMGTDARQDRGSDFVKFRDENKGRLSYLRGGRSFDNAMIMQINDYLFV…	DLQLNVRNKLDNRGLISGSTTLGVVANHIDQQGTLEARALTVDAGTLENHGKMLGVDALTLAIANTARNQGKWLSQGSSTLTADQVENHGQWQAGDITLQAADLTNSGQIFGLTALSLTAANGLTNQQNGKLLSQGIAVLRAATVANDGNAQADRLTFEAQQLTNRGRI	MGAPLLVFKPPTHDYCSKIMARDYNHSSFTITVENASIVI
>unique/4998/1/Org1_Gene716	>unique/5347/2/Org2_Gene1814	>unique/423/3/Org3_Gene2944	>unique/653/4/Org4_Gene111	>unique/3621/5/Org5_Gene4401	>unique/5237/6/Org6_Gene4114
MCFLDSFSGWQREPVAKTYKTGSKHGFTGSIFSTKNRHYFLTRCLKR	MRTQRAMIFVFQNKSRDFFPEFMTELPITACNIPHQT	MLTKIKLIDDLYSRNIIKNPLEYLNINHFRQFGENLSISFDHPLTILVGKNGSGKSTLLKLIMSMAKGRTPNDYFFETEWDQFNDQGVSEFSYKLDNNDYKEINTRHFDWVFAETEQNLKTDKEIKDYLTKNTHGKYFSKIVDIQFKSLIGSFEKNTFFDNQTSKSDLKSKVDYAKRVTKKVQQSIDTNNNGRKAKLISVSKTNIGIINNILGKSYTEIKIIEHRFFSGTWGTSIIFNSDNVYSEANSGSGEFIVTNIVNKLSSIQSGSILLLDEPELSLHSSAQKRLLSYFLDLIINRKIQIIISTHSQAFVEHIPSKCIKNFIPDQSGRTLIEQGVNYLNAFDNLGVMFNCATIIVEDDLAKKILDKVSFNEKLDRQFNIRYFSGGASSIQTSLITT…	MLNTFTYTFSNIKMVDEIFILSYRDWGDLIVNIENIKINGLNSEANYSIDIEDNSFIIVGENGTDKSTVLSMTYYLLKGDWSKLTDYDYEDITITIDGYTCSFPKEELLNFFDNMEGKIGIGRQGTHLSERLRQFVYNYIKTILKDDFEKAHEKDVIYEIRNDFKRLGNPVPPFKLIEEYIHEYSSRSLVLFENDASGAQSDLLKSMKLIKEKVNCSLMYLPTYRRIEQDLEILFPNSKKLLDYIEDNIDGDGIVQFGMKDVEGLLNDAMNRLSSDFRNKLRELIAQSLQDILGNRYENLVPDENLSSVSEKEFEEILARVDSETLSSQVKEEIRKNTRHYGKTRGEKKPDKVIFYFINKLLELHKLQSENEIGLMNFISVCNKYLVNKEIYFDRVKFE…	MKCRSRLLVFLPLLFPALCLADFSGRVVRVVDGDTVQVLTDGKMVKVRLNGIDAPESGQPFGQRSKQNLLKLAVQKQTEVIANNTDRYGRWLGTLMIDGIDINAEQVKAGMAWAYRYHGRASDETMLRLEEEARRHRIGLWSSPDPVEPWKWRKQNK	MIVSKKGASERNLNNCSPFRYLSIEFAGMTRIICSFFAA
>unique/5062/1/Org1_Gene2438	>unique/5355/2/Org2_Gene1925	>unique/424/3/Org3_Gene1349	>unique/682/4/Org4_Gene2583	>unique/3698/5/Org5_Gene4414
MIITPLIFISQQASCHQIEVVFATHAIQASCEMHSLPLHFTKNE	MHPAWIKKWREVSKFNLAEIVNLRRPNPLASVHP	MIHHIFSTLPSFKSLEDLKPGLNVLLAQKTEGASSKQTRNRAGKTSFVELVHFLLGADAGPESIFRTQELVEHSFCMDFDLKSERTVVERSGGTKAKIFVTAPPAAKVKFSATEWCAFLGEQMFGLNSLEAAGSKPPSFRSLFAYFVRRQASGAFTTPEKQATMQGTGDMQMALMFLLGLDWQIARDWQAVREREKTLEELKKAAGNGAFGSIIGKAADLRTELTLREARLKKLHAEVETFHVLPEYRELEVESAALTRQLNELANANTIDFSAIRDLESALASEVPPDLEDLQAVYQEAGVVLPGLVKRRYEDVKSFHESVVRNRKDYLSSELEAAKLRIELRDGKKALLDQRRGEVLGILKSHGALEQFLKLQGELGRLESEVESLRQRFEAAEQLE…	MGILEPASDLQDTLIAWYGVVVETFKFTKAKLESLPPTERGQVEYGDTVVNGLRVRVGVSGVKSFCISRKRNGKFIRATLGRFPDLTIDNARAKALELLGDVATTGRNPNVERRINEKASVTLADALDTYIESRDARLSADTAKQYRSILQNFSGDWMKQPIASISRERVESRHKAVTDGSVWFGADKSTLRAGVGAGSKAQADLWARVLRAIYRFSHDHYRDAEGKTLLPDPPTMVLSTKRKWHGTVRKTERIRTNELGRWFGALSSVRDAAEQGRDDIAAAVCDAVEMAIFTGLRKSEILELSWERVNLGGRYFWIDTTKNGDPLELPVTETLLNLFRRRAKMKSGDGSLVFPGDKGVIKESRHIIDRITAATVPNPNPDLLNPIPFKWHDGRRTFG…	MYEWYVLYCKNQDVERITRRIKGMDVEVFFPRYIKFTPRRDCRSVRQEEKPLFPNYLFLRFDVNVTHTSTITSIPGTHGFVSFGATPCTVPQSVITAIECARLMALNPDGDAIECRNISPDLLWKIQELSLIKIPLQRQVAFSQLLHNQNY
>unique/5125/1/Org1_Gene533		>unique/527/3/Org3_Gene1312	>unique/775/4/Org4_Gene2752	>unique/3712/5/Org5_Gene4406
MRTKPKNPIPQIENQIDSNCPPIEINLLILPQSRVNAGFMLC		MFLGKYRKEYLRHEGPEHVLTFAPTRSGKGVGLVVPTLLSWPASAVIHDIKGENWQVTAGWRSRFSHCLLFNPTDAKSAAYNPLLEVRRGAHEVRDVQNIADILVDPEGALEKRNHWEKTSHALLVGAILHVLYAGEDKTLRGVANFLSDPASPFELTLHRMMTTKHLGDAPHPVVASAAREVLNKSDNERSGVLSTAMSFLGLYRDPTVAEVTSRCDWRIADLIASEHPVSLFLVVPPSDISRTKPLIRLILNQIGRRLTESLDGSDGIERRHKLLLMLDEFPALGRLDFFETALAFMAGYGIRSFLIAQSLNQIDKAYGQNHSILDNCHVRVTFATNDERTAKRISETLGTATELRAQRNYAGHRLAPWLGHLMVSRQETARPLLTPGEVMQLPTDE…	MNSHPETLQEIGLGKYSWPQVIKWLLILLVLYAIGSVFISNPFSIFVDRTTPVDYSRVMYFHGMTVGLAGITSLIISQVFALDKKFKKIIFLCTVATIIIGVTGGAINRSMEYTKIFLWYQILAFIALDIILITMSVGLILTKDMELRQSRTWYLVLSASATAVIAALIGDLAGFILDFGDWPGILGWYAGKIGYTLEEWQDNLLRSHSDMMVVAVIGLILSVISWKYGRHMTGISSSAKATGEWMAILGLVLLIIIMVVSGFGGSSMQIPHIFTEKGFYAARGQSVAGIDLADFTIGTFFLMGGMLLMGAILFGKKSPGHTLSKTAKYTLSGIFLTWSSIVITVAGMGFLQEYRADLYNSAKDVPLGDYGFAFRMLHLDVSLILFPAIMVVMLLAHHF…	MKNVKIHTIGFTKKTAEHFFNALKKNGVIRIIDTRLNNYSQLSGFAKAKDLEFFLKKICDIDYVYRSELAPTKKILDDYKDKKITWEQYSIEYLSLMEQRLISSKLSSIDVDNGCLLCSEDKPHHCHRRLLAEYLKQQWSNQKTNINHIL
>unique/5163/1/Org1_Gene1912		>unique/538/3/Org3_Gene1168	>unique/793/4/Org4_Gene484	>unique/3834/5/Org5_Gene4427
MSIYLFKRKKILIIIFICDPSRNHMTALLSIITPIIKSKL		MKIKLSIYKAKKISDNIDQVLNLERVKSAIEFENEKARMYLYAKEYVEPQVPEWSTLFISANLDLGYDFFGKNSNTGAVLVVELNDERYLIPFGTGHHLINDNYIVKGFGLKTTLNCIEHKKIRSIDKGNHNETNLLTRNQSSKEVDIYNLKIDSELDILTTLTGTSTEEVLGNKITGRDAFVITPDVVLNSIPDLLEKISGIYNLPLPEEFEWVNNIQEADESEIEILDLLLIDLIKAKDFSDIWLGEPEIVDWESQIGYCFERRQRSIIYESLSMNHVCDFFETKDIETTIDNLKEKNIHILDADYQSIKKWSIYRCLYAEIKNGDQNYILRDSIWYVADRKFLATIDDEVSKILPYENADKFPIYSFKREEDYNSNICGIDVSFTHMDQRFIHHGS…	MFDEHPFPVHVFPPVIRNVIHEVGQQTQAPLSLIAASVLGAISLACQNRIDVGRPGDLRGPASLFLLTLAESGERKSTVDKLLMRPLYQLEERLFAKYTQEFADWRNDEVIFTTEKKALILKLKSDVRLNKDSSATNERLKDLLATHPSEPTRYKLMFNDATPAAIKDYLCGDWRAVGIMSDEAGTIFNGYTLNELPFINKMWDGSTFSVERKSSPERLIKDARLTLSLMVQPDIFKGYLERKGDTAKGIGFFARCLICQPDSTQGSRKITSPVSSSEHLPVFHHRLLEIVHDSIDRNVENERTCLHFTPGAEQRWIKFYNDVESEMGCFGNLSDFKDYASKVAENMARIAALIHYFNGDKDNISLAATNAAVKISLWFLEEYVRLFSKPQELTLLGSE…	MHKFSHAQALHSVRSALFFSLITGPALSLFFVFLLLSFNNSLAGTFVKEARELVANVPVDKVRMCIHPKQSEPVAPVKPLYVSPCEPVFIDTNVWQENWDRLIRNLYLTIFLLSFSIWLLVNGLLHISVKTIIRRIKSDR
>unique/5181/1/Org1_Gene870		>unique/541/3/Org3_Gene1343	>unique/844/4/Org4_Gene2780	>unique/3891/5/Org5_Gene4429
MSIKIHFCKRGIAGKFSIAYNCIIQIIYSEKKIYSEYHMY		MTASAQIDTTGLLTILGVIAAVWALISPTNRLQLRFCTTWMDWIVGGSVLLLVHYLTFAPTLEQLGLYYSLGPWKWGLDSSSAVYLLLLSVALYFFWRTRFPTLARGRVHVFRELIENLHLTRRYDELVLLVEPQLPALISMTRQQSFLVRWIENRGNSKEELAALLRGEHPKPPSAWSKPWRRFLHALKSRCAERDQASSQAREILLNLVTSPELTIHLAQAHPHFCLKLLKADEAIRSDFIAHYIDALLDAPGSRLYVELKNNRNLNGGSRLYLPESNRLLRFFFADAAMAVNNDVESAIGDSVRRRLGEDKNLAEKLNEPLGSYQEFGRFRCPINSGITLFEIMVHEGIHQGLQDHMWLHYFDDFAEKILKQISGALDEEVYQEWPTPFHYLLARL…	MTKLSISIRLALMFALAAMVIVSGYAILLHNSLHESLRNQMHKELQFRHSLIAPYLTSLTTPKDWQMIQAKFDNLIQVEGGKAQYWILSEDPRYRIGSPLPSGVNWAQLKSGFTKMPDNEDTRSFYLLITDIPSRGERPALRSAVAIDSTPYLGTLNEFTRVLIIITVVGVLLVAVLGFVIARIGMRPVNYLSRQAHTLAPGDNSRRLDTVALPVELQKLATSFNGVLARQEVAWKQLESFNADVAHELRTPLTNLIGQTQLGLSRERTSREWEDLLQSNLEELERMTSIVNDMLFLSHAQAGQFAKQLTKISLREETLKTAEYVEPSFAEKALTLRIDGDVLVQVDRRLFHRSLANLLENSARHAPENSEVTVTIEKIGELAYIAVANVGEPIADTHL…	MINKIKVIMLAAIVIGCSSPPPPVPVEWDKTAEPLNTSLPQWSDNNVIVPSPTVNGKWTSSISAKNFYDTIWTPAVFYAVAHSTRIVVTAQSGTDFFNAKNWLRQNGAKGVIEYQPVFNCLTCRETTIYFSRQSI
>unique/5186/1/Org1_Gene1679		>unique/562/3/Org3_Gene3629	>unique/871/4/Org4_Gene189	>unique/4083/5/Org5_Gene4413
MWCCPEETRAKCVPAPEMPLRLVFGQGRMPLSRHHGAAAQ		MNENELLNQTNYPPLEDDFSINELLSFIESKIVWDCVDVISDEGSSNIIITTSDNGIVKSCFRLNLPPREFEEVIKKISCNKKLILSYLQGVKLSSQDLSTLESIQGIYIRTRGQSREVDLPTLTEFLLAVETGSRDKGRGKDFTAKTKRIVNMASHSRCMFIGCGEYLNIDELTGQEGNYSYLAHNVASSENGERGIPVLSNLLSNEPSNILLLCDKHHRLIDRVAACDYTAEILSNMRNNFIRDADELLDGLRYQPIPVYSILWPINTNVASPPNKKEISASLSILNLKMSGAINSIYDSNDSTREAPESHKYIMPSSIKTAADKIIQQTRDSGHRAALFAFGPTPALVALGALLGNKSQYTPMLRYREGACWKWPSSTATGMFYDRDGFEELELSE…	MLLNNESIWDERRGSNKKRAEEIRSESKRDLSRLIHSSPFRRLQSKTQVLGLGESDFYRTRLTHSMEVAQIGSGLLSQLEIKYKNNDAWGLLPDHDLIQAICLAHDIGHPPFGHGGEVALNYCMKSFDGFEGNGQTLRILSRLDKYTAEHGLDPTRRLLLGVLKYPVSYSLLVNKNRYDPIPASSPDWLFKSSNYKPPKCYLDSEADVVLFALKPFSSEDQALFTSIETIMTPDDKQPSHNKSIYKALDTTIMDLADEISYSLHDLEDAISLGMISQNMWMEHFEGKEELFSNCHCSTFSGTINSVANSLFGESYKRKECIGMLVHLMITSVILVDSNPDFKSGLLRKKAVLPQQVEALREKIFSLVKVKVIQHENVQLLEFKGQRLIVELFGVLASDP…	MVPKRLKEAREAAGLSQEKLSELVGVEGVNPRSRMSNYEAGRFAPPFEFVCRVADVLGYPEYYFYIVNDVTAKLLLQMHRGEQNLHEDIEFEAKKMAEQLEDARKLVAQLTECLKHRP
>unique/5232/1/Org1_Gene1283		>unique/609/3/Org3_Gene3520	>unique/872/4/Org4_Gene188	>unique/4143/5/Org5_Gene4402
MLCFLPHKNAGAKCEEIKILCQIKVPGTVGFIIFPPPYN		MSANALLINNEDDEKNQAKTDGYYFSLNSDIWVLSRNYSVNVKKVLNLLNEDMRTGYINTMAYLARECSPCSVKVFNRAFSLFIKNISMGCVDKSSVIRLKGSPLFGNNELSHFRIFINHWYELGYYGVSEEAYDIINSWIIPDNKKGEIVKRRDPEQGPLTDNELQGFNEAAMRTYEKNLISLSQLMMAILVSYTGRRPLQISQMKIEDIMKAKSEDDEITYLINIPRIKQGYGFRELFRTFRIKKEIYDLICKQAKASIEIISVKLKRDLTDSEKKITPLFLSECKIDEYLKNGRIEDVFISEKVHEYPIKFTNTLKKIVELENVISERTMNKLNINSRRFRYTLGTRIAREGYGEVIIGQLLDHSTLTYTGIYVQYNADHVLKIDNAVSDEMAKYS…	MSSAAHSFKKCFTSKNLKKIYFEKIKESGAIGIDRVRASGFERNYTSELSLISRKVADGNYKFTAYKEKLISKGAQSFPRQISIPTVRDRIALRALCEALSDVFPNAKLSLPQVVIESLKDVIHSGKYTEFAKIDLKNFYPSIPHSLIERSIKNKIRKAEFRTLIIRAISTPTVSESKGSKGAVKNISGVPQGLSISNVLAEIALQNIDEEISRIPDIWYKRYVDDILILTPSGKSVDVANAIFAELNGIGLCPHPIGQVDSKSRVGLLNEPFNFLGYQVSEQGIAIKRDSILRFESSLAKIFTAYRHALAKAKSKKDKQRAIAYCQWKLNLRITGCVFDGKRMGWVAYFSQISSTVQLRAVSHTIEKLIKRFGVEDEIRPKSLIKTFYEWHRGDKNSH…	MIFAKFQSLTHKIDTMVIRDIKREMPLKYWSFKVAEWIARIGMIGFVCTFLTYFGLGLIMQHSGQNLPESFTEGCAQAIVALIAIALVGFLVRGGLYVDLEKRILDKWQGYVQ
>unique/5234/1/Org1_Gene1203		>unique/639/3/Org3_Gene1490	>unique/906/4/Org4_Gene2387	>unique/4194/5/Org5_Gene4410
MMKTRLDSYTNRLTSFQDKKITFLSLYVHFKGIIYSIHD		MTVFSENKNEMKKAISISEQVDFIRKEQNKKLDEKTRGEHGQFMTPSSVANILASMFDSLDDSQRILDAGAGVGSLTAALVERAINNFNPKEINIDFWEFDPVMIDGLTETVKIINQSCSINNIESSLKIHEENFILNSSAIIKSNKGFFDKAILNPPYLKISAKSEERKALKDLGIETGNLYSCFVCIALMLLKDGGELVAITPRSFCNGPYFNDFRKFLLNGNNIKKITIFESRKNTFKEDKVLQENVIFHIVKGEEQGYVKISTLSSSIDKDPYVRLCSFEDIVPTSNPEKFIHIITNDEQAKIAKRINQMPCSLQDLKVEISTGRVVDFRTRENLINIEEDKIYSIPLIYPHNFIDNVIDWPVQHKKKNNSLKVNNDTESLLVPNGHYVLIKRLT…	MPNNYYQYIEDVSDDIKTCLEGMGCQPILFVGSGLTKRYISGPNWEELLQQLATECPNIDKKFAYYKQKYPELIDIGSVFSDAYNEWAWGGGEKYFPSELFEAGNEPDIYFKHKISNIFNSLLQDNKIIDNSEVELLKKIHPHSIITTNYDELLESIYPEFTPIIGQKILYANHGSIGEILKIHGCCSTPKSIIINRDDYGDFIKKKKYLSAKLLTFFAEHPLLFIGYSAEDENIKNILSDIDELISENGDVIPNIYILEWVDKQNDNEYPRRERLIQVSANKSIRIKSIVANDFSWVFSAFGANRALDNINPKLLRSLLARTYDLVRSDIPRNPVQVDYRVLSSISESEGELAKLYGIATSSDGMAFNASYPFTLTTLGQSLGYKGWHDANKLLEIVK…	MFSVVYHPEAREEATALPVKIRVKFDRLIGKLEYDARLLREPDTKPLGDGLFEIRTMGTDIARGIWVYHKGNTIIMLRVFIKKSQKTPAKEIDLAKKRLAEVLNETGKP
>unique/5264/1/Org1_Gene4569		>unique/699/3/Org3_Gene2772	>unique/984/4/Org4_Gene515	>unique/4289/5/Org5_Gene4418
MKRRSTSTHAGLAVTLLFLSEMDGGDTLRCSSFCASTA		MSLIDDAIGLVSPGWKAARLKSRALIRAYEAAMPTRTHRAKRENRNANQLSDFGGRSLREQARYLDNNHDLVIGLLDKLEERIVGARGIIVDPQPLLRTGLVADEFAKQIRHAWAEWSVSPDVTGQFTRPVLERLMARTWLRDGEVFGQMVRGTVPGLTPSAGVPFWIEALEPDYVPLEMTDTGKSICQGVYLNDWGRPTKYVVYKNLAVSGVALGQTKEISADNMLHLKFMRRLHQVRGNSLLSGILIRLSALKEYEDSELTAARIAAALGMFVKKGDALTYDEADKGEPRDLDIVPGMLFDGLLPGEDIGMIKSDRPNPNLQSFRNGQLRAVAAGSRSSYSSISRDYNGTYSAQRQELVESFEGYNILQDGFVAAVSRPIYRNWLQMAITAGIITVP…	MAIIITQDRQLASLSVTEEEKENVVSVKSKAGGGLYIRVRHGSESKSWIYRYRIAQKQIKLTLGSYPAMGLAQARQAHAEAAELVKKGIDPRYARKNEKQQNEQMPIFADLWQNWLAFRTESKPISTRTIADYEGTYRRHLEKALGNMRVNDLSRSVIFEHLSRVRKDSAEGVRKGLIILNLTLDHATLQGLIEHNPARLLKPAMFGASMGKPRERWLPQDELHMLWQVLNEASVGGGSVAAGGRGIASSVVMSLSVANALRLIIFTGVRRSEAAEMRWDQINGDRWTIPATKNGKSHIVTLHPHVLSLIQEQRVITEGAYVFGSTSKPGFPITGDALTRALERVRSKYLAELAPFSPHDLRRSVATGCAEYLDAPERLIELLLNHIPKDRLIRTYQVG…	MKPFSKVKELISRVSAYVLAPAMSVFAASPAFADGFTRANTIMEKVSTGLHGLAAITITVAVIWIGYKTLWKGESLSQCGYIIIGGILIGGGSEIAALLMS
>unique/5289/1/Org1_Gene942		>unique/723/3/Org3_Gene3527	>unique/988/4/Org4_Gene1870	>unique/4295/5/Org5_Gene4430
MVQIVWRCLVAPLFLFSFFGDEFFHSRKIDFFFTRFND		MKMTLNQSIIINKLSIDVKPAFDPEGRIIYAPNPGRKPYLITDNHRDSPVGFGVKISATKKTYIIQRRVDSGQRTATGGKAPQEVIRATIGNVSDFANIDQARETARNFAQTMKQTKRSPNAIRKEINVAELTISEVFAQYRNHLLGRTKPAKPNTLNVLNKAENRLKEWESLRVKDLSGNEILRKFDEIASRARTAAEQTFRWANVSVQHAIEIEAINAQTQQRQPSLTYNPFTILKVQKKYRTRSELEDSYRAKGVRNPLSPKDTLGRFLTALHNKRSFNRIGCDYLLLTVLLGARKEETASLCWREMLTDEEARTTSYVDLEKGLIRFYDTKNRNDHELPICDAVKRTLEDRRDIVFYEEKSPKRQRWVFPARSTRSKIGHYSDSKSLREYLCKDA…	MFWTELCFIILALMYGARIGGVFLGMIGGLGVGVLVFLFHLSPSSPPVDVMLIILSVVLAASSLQAAGGLDFLVSIAERLLRRHPKYITILAPFVSYLFTFMSGTGHVVYSLLPVISEVAHDSGIRPERPLSISVIASQQAITACPISAAMAAMIGFMMPLDISISSIMLVCVPATLIGVAAGALSTFSMGKELADDPEYQRRVKEGLIQGTEQRKARTPATWRVKLSVQLFLLGAVVIVLLGVFPSLRPLIETAKGAQPLSMSYTIQITMLSFACLIVLFCRPSIDQILSGTVFKAGALAIVCAFGLAWMSDTFVSGHLPFIKAGVQSVLQEHTWLIAVMMFFVSAMVSSQAATTMILLPLGIALGLPAYALIGAWPAVNGYFFIPVAGQCLAALAFD…	MKKTVITAAVLCLTAGTPIYSFAADPCEVVLCMYGKATGNSGGSECSSAERAFFKINAFKKHHRFNPGKTFDMRKEFLGECKAADPESISKILSKFGRVKG
>unique/5318/1/Org1_Gene1627		>unique/824/3/Org3_Gene1319	>unique/1000/4/Org4_Gene2097	>unique/4381/5/Org5_Gene4409
		MRNAKLVLLLTASTLALSACSLAPTYQQPPAPMPSNYPFVADAVNGAGMAMPAWDEFVEDANLRSLVQAALVHNRDLRQALLNIQAAQAQYGIQRADRLPTIGANGALDRQRIPGAVSPNRQGGVQSIYRADVGLSAFELDLFGRTRNLSEAALQEYLATEQAARGVRISLVANVSDAYVRYTTTQARITLTRQTVKARETSLELVRMRREVGAAGEVDLQEAIGLVEQATTELLRTERESEQARNALQLLVGEVGLNAHIAAPSTSQELFQDVRPGMPSELLARRPDIVAAEHRIQARNADIGAARAAFFPRITLTGSFGSASPELSDLFSSGTRAWQFMPQVNLPIFAGGRNRANLSLAQVRKESSIIEYEKTIQTAFTEVADALVARSTLQKQLAS…	MNNLIKYNSDKISLHEHKIVSSLENNGLKIRELICIMNEKLVCGFVYTVQYYFNSNSDLYVRSIVRNMESLIRELSPTHIDDMVLIEYQNKQLSKAPASFRVLRPFLIKWFEFGYPGIDESAVDLLKHFDLKIKKAGQSVLQDDPTGGPLTKEEHTSLIKAMNHAYRIGKLSLSDYAISLLISLTGRRPQQLVMLKYKDLLQKNLDNGKVEYLISVPRVKQRCKQLQYRELPIISEVASIVQLQANHSVRLVEQTLGKTLDDHAKGKVPVFLNEEKLLDLAIIDFNFLESDKIYVKPTIANRALKNIVNTGNLISNRTGSLLNATPRRLRYTIATMLAKDGHNANTIAELLDHSSTSSTGIYIKNLAESVERIDSAVSEQLSFVAEIFMNGIKSKEITN…	MKLVSHKELHNEWMQDDEYRAAWQEEERKEKLRELLAEWRKHDNLTKAQVAERMGVTPPVISRLENNITKASIDTLTRYAHACGIKKPVIALY
		>unique/842/3/Org3_Gene3510	>unique/1104/4/Org4_Gene193	>unique/4576/5/Org5_Gene4403
		MSRIIEVDSEKVVFFCESQESDFFDFKSKDVSGKKIQQTAVAFANSEGGEILVGVQDEKHEKDVLKRWNGHEKIEGFNSIIQALSELNPSIDFYYTFLRLKGQIHNYILHITIRKDTAVHKTPTGDIYVRRGAQSLKLSSTSKILELTHAKGITTEEDAIVTNAIIDDLVDSKVLADFLSQLPITDPDPLNFLLKEHLIDTKNWYPKVSSLLLFSENPSSIIPRQCSVRVVRYDTTDEDIDRDNLQENILLEGPLFYLFNSTLLCIKELLERTRVWTINGFISAYYPDETLWEILVNAIIHRDYSISDNVQISIFCNRIEFKSPGRLPGLVTVDNILENRFSRNPKIVRLLSKFKNAPNKDLGEGMNTAFQKMAEIGLKSPEIKEDGNYVKMIIRHIPS…	MKKTNTVKEATTLVVRAEMSVVGGVYHEVCLRPSYHDVYGSAGRAASALSHLNVPVMLYTYADTDTTELLCERATHEGFGLSIQAASKPIYFDYDQGLAEPKIYGVPENKLPPQIIKDKNILRYGMLEGTAIIDAEYAVYDPQNVLKPEKFGENGSKAENLALVLNRYEAASLSGKKELSTEEQATFLYANKFAQVIIIKQGPAGALICDHGKISSVPAYETQNVFKIGSGDAFAAYFAHAWMIEKASAHDAADRASRATAYYCENNLFPSSEGLKNFNPVAIIPSAAFMSGRRPSVYLAGPFFTLAQLWLVDQARRNLIDLGMKVFSPYHNVGPGVADEVVAKDLEGIRNADIVFAIGDGLDAGTIYEVGFARALGVPVVFYAENETEEDQKMMEGSG…	MANVPAKPRNTKGEPPSQADTEHGFNPTRKSADGRKAQLNLYIDMELKREFRSIAAANDMKHGELFEAYQEFWKKHH
		>unique/863/3/Org3_Gene1304	>unique/1112/4/Org4_Gene128	>unique/4593/5/Org5_Gene4421
		MNDVTIIDRFLDTFSRYIDSGFGLLQGEVAFLTATLIAIDMTIAGLYWAMSHATGQGEDVIAKLLRKVLYVGAFAYIIGNFNWLSSIVFRSFAGLGLTATGSAITMENFLQPGRLAKTGIDAAAPILEQIGDMAGFPEVFVNLDPIVVLFIAWLVVILCFFVLAVQLFITLIEFKLTTLAGFVLIPFALWNKTSFLAEKVLGNVVSSGIKVLVLAVIVGIGSGLFAEFQIHPDEPSIDHALVVMLASLALLALGIFGPGIATGLVSGAPQLGAGAMAGAAVGAVGTGVAIGAAATGVGGAVIAGARMAPAAAKLAGSGARAATSAASSAKSAFQAGSAAAGGGAKGAVAGLGNVAKTGAQAAGRSAASGASAAGQKVADSFRAGWNSADAGAAGSGQTA…	MIRLSTTRLAAKSTLDEILSEEDDLCLLVVHPLKHKASPVDLAGNQFAEIAAFYDRHGRQPTESSTASLDEKRLARRLRIIKENPNICASLKTLDCWGLLASNYIGNGRTPLAAEPAPISYSNKSELVTSLEDIFADDDDGLLNFAEPDIFSLQYVSADKKEQPDEIAQRQPCQDFQRFEPLFYSLHEGLKNGFFSLERFTHKLKIVEGDFFILNGVLGYVHSAGERLDQYRTYNARLRLVFENGTEMNMLYQSLTHGLVRDKEGRKVQLNGETLQPLDTAVPTGLVYVLATTSTDPALIPYKQSLYKIGFTETTVEQRIEYADKDRTFLEAPVRIVATSQCFNLNAQKLEALVHGFLAARRLNIMLKSHNGQIYTPREWFNVPLATVQAVIQHIVDGT…	MRLLKISLLTLSVFLISGCKEEAKTTKWYKDHPEELKAVYEKCQKTGSASENCKNANEAHWQIQQLNAPTIDLNS
		>unique/903/3/Org3_Gene1153	>unique/1146/4/Org4_Gene2785	>unique/4646/5/Org5_Gene4415
		MNDLNYQEQRVFLKAKQPDYSFCINDEKWRLNRNSIVNVEAVSLLLEPKLIDGYLNTLAFYACRYSPSYVLKINNAMTDFIGKVSPDYIDESAILNYRTSLSKWKMQYLVSLRCFFTKWYSLGYYGIDEKVITLLKATKLKVKEAGDIIRQDNPDKGALTDNEHKALNQAIYSAYRNKKISLHEFSAALLVSFSGRRPLQITSLKLKDIVKERTRNGEMKFLINIPRVKQGLGFREAFRLLNVNKSLFDILSQQASASVALIESQIGRALKSAEKDEVPVFPDRTHCKILVGKEKILDLLVSDRLHASKHIVDIILKRIIKKENVISERTAQPMKMSAHRLRYTIGTRLAREGCSVQVIAELLDHSSIASAGIYIENLPDNAEKISQAVSEKLEFLADV…	MITNDISVQSFEEMNWWDYRTENNLFLTGNPMNKNFHKIFEPFVFPNGITLRNRMVMAPMTTWAGNTDGSISDEEITYYRRRVNGVGLVITGCTHVQENGIGFTNEFASYDDRFIPSLKRLADAGKSGGAPMILQLFHAGNKAIPELIPNGDVVSASAVNTEAGPFGVPALTPRQLTHDEIKETIRAFGDATRRAIEAGFDGVELHGAHSFLIQNFFSPKFNRRTDEWGGSLENRLRFPLAVVQEVKRAIKTYATRPFILGYRLSPEEPDREGLRIDDTYVLIDELINHGIGYLHVSLTNILETLPIDRTEDKTIAMLLLERINGRAPTIAAGQIKTPNQAAEALELGLPLVAIGKTLVVNPDWIELAEKGHSEEIDIALDQSKIVYSDIPSKLWEVID…	MPKNVSGKSTTAVIYIGKNRYQELAKHAREISYLSDSNIRPSTFLHYLIDQFSDQAHTELLKQLLAEKQKE
		>unique/928/3/Org3_Gene1475	>unique/1211/4/Org4_Gene2746	>unique/4651/5/Org5_Gene3390
		MDYITSKLEQIGAIGAFLLIVIVCSVLLCVYFSKKRKDNIPTIISKWTHTANGNFVLVGVSIIWASIVSVFGSQLQQQWFDGAKWGIETFIFGTSVTLALVLSFLHYIQSQQKELQSYTRPTYEAIKENSTQNLNLMKVINECIQDFKFILAKENNKKGVVFSDESEREKFNTSLDKAIETAIQSVLLITKRSIDGYDDVHLKANIFNMINSDAVHNRLSKESDDKNSIFNSRAVTSSPFFLFSTNLQSRLEKCDYILVCEKTFTCQLDRENKFSNCYNEGIDKEADPLCMPFTLNHSDVNINHPNLFGAPYAAITKHEVYIKNILESVNDYIDDLRKSPKFKEHMNDYYERSIRNYYEKDSDKPKSLISFPVYNIEIDIEKASTLFDGKSVMCIFNIY…	MTTLRYPIANRHTGLVRYAFAAMLARIADGGGVLAVILLCQSSEEYVAVTGWMAACITLPHMLGPFIARSIDTARDGRRVIVTACLAYAGLTGILTATFGQIPIFLTALLLIAAGLCGPLLTGGISTFLPAIAEPDQRSQRRAQGLDVATYGFGGTLGPSAVATISAWSSPSTAFYLLAIVTVLSALFIMRLPVPSETHNAGHKQVLSSIATMGLMIRDMRLCRTLYLTMAVAFAVAVLPVVSVNMADVLDISVATAAFLTVAYGAGNLAGSLCLILIPLRGEPDRLMLNTGWMIVAGLLSIFMVSSFLLVFICFLITGMLNSAFFAATLAARSEYSPPFCQGQVFVWIGAMKITAGSLGTAASGQLMTLGTYAPLILSVSVLVAILVIPLSGRMWQSI…	MNLFQISSDDVITDIPWGSKFSYGKHLISHVILQAACALILLLDSSMDFVLSGSRFALFKILTFYSVTRII
		>unique/958/3/Org3_Gene2926	>unique/1268/4/Org4_Gene489	>unique/4807/5/Org5_Gene1434
		MSVYFSEPVGESTTLADKPGEVKQYAQAAKKKNTASAVSPPQSLAGKNEPSPKTSPGAINKPQIPPMEPWYKTVFDLLVGKADAAMLPPPQPVVMAGTAAQAGATAAAGGVVAQANQDAAKALTHQMKRLSGPSIWQGQLQMAQSFLLMGALIQHHLKGEKDDLLTQEKLLEVAKKQGTVPSRVRYQWIEDEETGRLKAVGYHTSMESGRDQVRVRLLKHDFPNNRYEFWEEGATGPTILWTPDNPGMELPTDTAHGEQPVIPSAVPGFEIPEMDDVSILATPMPDEKDFRDYILVFPENAFPPIYVYLSKPPVNLLDVDLYSNFKGRSRQGKYHADHMPSAAAVKAYLRRLYPKLDKKILDKMAEDVAAIIIPAEIHQKISETYGNRNRPQNIEQDSH…	MYKVDTPTNSLHALQEVSFSSLGFTERYHLQEWLAKNPQALTRDNDNELLIIQKEFAGFDDTKERLDLLAIDKQRNLVIIENKLDDSGRDVIWQALKYAGYCANLRKDQILEIFQRYLDKYEPEEARPAAEVMAEFLECESLDEVQINQSRTQRVMMVAASFRKEVTNTALWLMQFGLRVQCFKVKPYKFNDEVFVDIRQVIPTPEAESYMIGMAQKEAEEQSASGELKTRHQLRKAFWTKMLERLKASTCTLYNNISPSTDHWLSAGSGISAVSYNLIFSKKEIRVELWIAKASAESNTFAFNWLYERKEMIESTFGHALKWEPLPGKKSCRISFATFATSLDESNWPEMIDWLLVNLTAFEKALDPFIIPLNIALKAISNAPEDTEELETGEA	MVPLLPPLGGRNPKELIFFIEINKVGDSGYLRHHDGVKSRVGAQRLGHIFMQPPRPFRAP
		>unique/1004/3/Org3_Gene1469	>unique/1322/4/Org4_Gene2092	>unique/4830/5/Org5_Gene3205
		MANHKLTAGKQLIDGIVQLGWVLGYHVKKEFPVDEASYGESPAVDVAWFSQKGNRFPLFIFEVESKATNGMTNNPLKIYAQENRAFEKPLFFFHVVAQGGNHSARPRNLEALYGKHNYRIYLLGSNAANDLIKDVLTQHARVKNEVSYLMLHKLLTSKLWLGKIDCPQLIMDAVHLGLSKENIICSYIKICRCDSSLFPDLVKLITEDSKKNFANTILDSYLGSQWCVPVIFALLCGLSKNTGRSKYWSSSLLKWQKCNSHMPMITPAFGLARDYDEFILGCAPQLITLCIAISCKDKNLYLEFVEVLSDILTKIGVCWEGLNTAIYLLHISASMNSSELFEKSRGYILEFKNIDEGNIFIPPSCVSIMDGEFEDYFQRGKITNFLEMEKFAEQCRAIY…	MKGMQKIKRGKSFAGVVRYVLQSGAHHKSDPVVIGGNMLSDSAVELIAEFDSTKHLRLDVAKPVWHNSLRLPNGESLTAEQWSSIADDYMRRMGFGDTHLSCYVLHDDSAGQHIHIIASRIDMAGGKLYLGRNENLISTRIISELEIAHGLTVTKTAPAITPKQPKRRKVSRNEQMLSERTGLPSPKEALQQILDKSLADTPDLLTFTKRLEEAEVSWTANVASTGKMNGFSFSYRDIAFKASKLGKAYSWANLSNRLNYNPSHLEALQTDIPEKEAVPAHIPMSVPVPVEQIARATVRSESIGDKIAEIELRLSEDRRNEIVEKILKKNAVQQQKYLRLSSWFPFIQRLIKLLRSYGKSILHNNPARFSKVYATQHLSQKIKIRL	MLKKHVFFVKFCHAARSALHLPFHGCHLSLASGKKVMMRTPDVAVLQSIRDLDGEFAD
		>unique/1052/3/Org3_Gene3627	>unique/1391/4/Org4_Gene118	>unique/4872/5/Org5_Gene4470
		MSSQVLDYTAQDSSQINSWEKMLLEASKKISLTPAQYALIESRYSQLQKILDKAQEFCLSGAHIFIQGSIGLKTTVKPAPEAKGDMATIDADAIILLPNAVNSSSEDVLLAIEELFKAESTVKADPQQLRRGIRIVYSDENPGFHIDITPAIKVSGNYEDDGYGKLLVPDREDGWKASAPRSYSQWLENISTEKIVMISESTRTMDSMESIVGNADFAKSTMDPIPNYQEYSDSHPLGATIKLLKRHRDRWAIRSSSELYRPISAIITTLATQAYYKIALKSASKPMRPIDVMFSIVSDMIQHVNDSDNEYKVLNPCDEGENFAEKWNRVNGEGEKYRAAFYEWHADVITDIALGLSDWGTQQRFEQEVSDKFGVPQSMISEITKDFGTSWTLPGRKSG…	MYLDFYGEKLRLARLLKGVTLQELGDAVSASRQAIHQYESDARAPSMDVRNALAEYLEVSSGFFGIPMSGDVKPEQCHFRKRQTTPVGVKERVQAYSTVLEQLVVELNEHLDMPQNGFNLIDNTKITELTPPIIEKIAEGARLRWRLSADAPIDNMVNVLENQGAIVTCFDGVSDKVDALSVNRKYPIVIRNTAKESVCRMRFDLAHECGHLVMHDGIETGCKQTEREADAFASAFLFPRKSFASEFPACLNSDGSFNWKKVYELKIRWKMSAKAIIFRAHFLGFINAQQYRSANVWFSQTRQSRQEKFDDVLQMEEPHILKESILVMKEQLGITFEKMADKLGVKPVLLASVTGIEYKETTLDIYDDVVVPFNF	GDVVAVPQVADIVLCLLTAFAGTSPERVVTVKPAFAHRGVDNSELVTVVPAVGK
		>unique/1090/3/Org3_Gene1301	>unique/1399/4/Org4_Gene47	>unique/4901/5/Org5_Gene2905
		MSQDDTPDLSTPQAGKVAPEAVALRAQPRPVTRLNRRTLAILAGTLLVAVFGALMWSLQPQRRGATEQTELYNVDRVSKSEGLDALPADYSKLPPKVPELGPPLPGDLGPAIVKSQQPVTAAYAAPGHDPHDALRKEAESAAASSVFFRSGSQKAAPVAHTQVAAAPGFAANAAFDPLAAGPASTAAQPADPTAVQNRQDQKEAFQKAGTTETRNSGNLTLPASPYQVMAGTVVAGALVTGIKSDLPGDVIATVTEPVYDTATGKFLLIPQGSRIMGKYNSQVSYGQSRVQVVWNRIILPDTSSLMLDNLVGADPAGYAGLEDDVDYHWGRIFAGAALTTLLGVGAELAAPENRQDGNRIVVAGRDSAQESINQVGQEMTRRNMNIQPTLTERPGLPVR…	MKKRIKKILLSKALDKYFSTVSRHKRGQLQEFYRINVIKRSRLANRNMDEISSIDIAEYRDNRLSEFNARTQKPISANTVRLELALLSALYNLAKVEWGTCSINPVENVRKPTVSSGRTRRLTTQEERQLTRYFKDKNPELLAIFQIALETGMRQGEILSLRWEYTDLRLGVAHLPLTKNGTSRDVPLSSKARQILCGLGERPHHENGYIFSYTSSGFKSAWRVALKVLAIDDLHFHDLRHEAISRFFELGTLNVMEVAAISGHKSMNMLKRYTHLRAAHLVNKLDARKKQAKKLASIFIPYPADIDIDDTTVTLKFSDLDNLSVTASTHDDALRIASVELLRFQAIAAKNGRRLPPPGSISVNSIDRVLISPL	MKKLGKLISVKKNNLLILYYFNKNIVSYKTQTTQPLALQNVSTVINLTFNP
		>unique/1092/3/Org3_Gene2576	>unique/1400/4/Org4_Gene2782	>unique/4909/5/Org5_Gene4431
		MQEGAYRFIRNPNVSAEAIRKAGAMQTVKLAQEFPELLAIEDTTSLSYRHQVAEELGKLGSIQDKSRGWWVHSVLLLEATTFRTVGLLHQEWWMRPDDPADADEKESGKWLAAAATSRLRMGSMMSNVIAVCDREADIHAYLQDKLAHNERFVVRSKHPRKDVESGLYLYDHLKNQPELGGYQISIPQKGVVDKRGKRKNRPARKASLSLRSGRITLKQGNITLNAVLAEEINPPKGETPLKWLLLTSEPVESLAQALRVIDIYTHRWRIEEFHKAWKTGAGAERQRMEEPDNLERMVSILSFVAVRLLQLRESFTLPQALRAQGLLKEAEHVESQSAETVLTPDECQLLGYLDKGKRKRKEKAGSLQWAYMAIARLGGFMDSKRTGIASWGALWEGWE…	MNDKAFNEQRRKFLGTSALVVSGVAMGGSMLMPSLASAASTKSTASASPRATVTVPTVIGYANEKGITIDRVTYSNRNTQTNIVANLFKPADFDKNKRYAAIVVTHPIGGVKEQTAGLYAQKLAEQGFVTLAYDASYQGESGGEPYLMELPSARVDDISCSIDFLSTLPYVDADRIGSLGICGGGGYVLNAAQTEQRIKAVATVSAADIGDLRRNGLANSRTYEQRMKLLKEASEQRTREARGEPIRLTAAVPESTKDFTDSTPVMYREGYEYYRTARAQHPNAPARSVFSSLPAQMAYYAFEQLETISPRPALMIAGDKADSLYFSELAYKKTQEPKELFLVPGASHIDMYDKPQYVTPAVTKLTAFYQQYLA	MRDHLSELNEADANKLRRYAESKGTKIDDASYSEALEAERECRSEIYREQM
		>unique/1102/3/Org3_Gene1350	>unique/1473/4/Org4_Gene490	>unique/4975/5/Org5_Gene2129
		MDKKTKGSWLIHHTNKLQGITNQAGYDKTFLAGKAGILLSAISSNNHATLNNDRLNVLAQAANINTTFELPKLIEVLKQQQLVDTANGGVAVLGVTTAKTLQHTSDIFDALMPGASEVASIALAEKASVEPVLSGHVSTELADFYKLAKPDIQRLMSDAEQIGFVDAEDLGAGQTLLFNGNLFRRETTRKIKAVLDSLSSAEQAKLNELTDTLKKRACVSTDYATQLLGEPLFKKVAAIGLFDISVVSNTTEDAGFLTLPSAFSKYSNSMVDDAFDLAKAFVSSVTYGMTKSNYARGQIQMVDALLSALVRGESVGPVNAIAQDYKVLELKGVVEVKHGTKKGRSGPMLKLLKTEVGELALQAIRQGDVSEHSLNSLPTAAVTIFNGPEHNREKVRRAQ…	MDQSYIYYLLKTKSFSEWIVNVAQGSANQARVPVKNIGEFIVDLPPLTEQKRVAGILNSLDAKITLNRQINQTLEQIAQALFKCWFVDFEPVKAKMAVLEVGGSQQEATLAAMTAISGKDADALVVFEREYPEQYAELKTTAELFPSAMQESELGEIPAGWESSSLAKKIKLIGGGTPKRSEENYWGGDIYWYSVKDAPTESNIFVIDTSEKITLEGLNNSSAKLLPIGTTIISARGTVGKLALTAVKTAMNQSCYGISGEKFSGQYLTYLKVKHCIDALKRNTHGAVFDTITTNTFDTVNVLTAGQKINNAFEKIITPLFEAIKSNLITNSYLSQLRDTLLPKLLSGEITLPEAEQTISEVENV	MSSPHWNQPVGKAIGKGGGCLQTTQYRIGRIIVIEPRKQKSSDLTAEL
		>unique/1123/3/Org3_Gene2957	>unique/1550/4/Org4_Gene2787	>unique/5019/5/Org5_Gene4397
		MKVNQFKLKELGSTCAICFAMLYTNDAMAAYPVTNYALDPYLMGQAPQSLGNGLIETLVSMNDKLAQATITANENQKNAVVSNANQAIQEQRMQNILKRIPDANACEEITSAGGRGSAGSNTSSAKEALSENSVKTFTQASTGINEAKKNIMGRVSIDVCSEEDVKYSRGGCSTIGQYPDKDKSASSLITPPLSKSDIVSNKVSNQSYSINQMKVAEAAKRNLIGNLPVEPLNNKGLEDTSEGREYLSVFSSFVSRSTAGTNAIDSILAMKKASNVSVNSRGANIGSSLGSTQGANLAWTDGTVKSKYATLFPGTTFPDNPSEWEMLRYEIYSRYADTTGADAWQVKISSADEKETAHEQARMQALDLRLQMLQIERTEDTNILLAALIGQQLQPVDKQ…	MCSTYGYVFKDEGEKHYMKAYRLDNFTSIDDLHVQQGSIPQPQQGEVLVRIHAVSLNFRDIAILRGQYPAPHLKGLIPTSDGAGEVIAIGEGVDYFNVGDRVMGTFHPRWFAGHMPTNLFHYGYGSVSDGWLVEQKVVNQESLVRIPNNLSYEEAATLPCAALTAWSALTDGSPIRCGDTVLIQGTGGVSIFALQLAKAAGASVIATTSSTEKAKRLRELGADQVINYREEPRWGDRVRDLSNGQGVDRIVEVGGPGTIAESLRAIRPGGEIALVGFVSSGGAGVDYINMFMSGATLRHISVGSREAFKDLVRAIEMAGIKPVIDRIFDFEEAKKAFVHLDSRAHFGKVVIRCS	MHCVYQRLSDNFSNNARAYSTAAFTDCKTQTVIHRDWVDQGNNHFD
		>unique/1137/3/Org3_Gene1161	>unique/1551/4/Org4_Gene2809	>unique/5035/5/Org5_Gene3692
		MNNQEIISLLLKVKQEVIKIEFDNPYHVWVFDNSSYSKIEDDITRLQEIACLELETTKRAEQTKVTLLLTTDICWYSSVDDYFKALRLRIKNNKENIDGFYIENLQQEEIESISNSSKAYIQWCEIFSKISDHVEYDDSNAWPSYIFVMEGGKSKKITTYNLPLKNIEKDFLNSIDISPCDVSTLTSVDLHSYERKLVLRSSLIELYNDSNDKVSFLSAILQSPQKLWDLFSINYEIYINKYSINKIIHEVETQKLDFLSKLNSLVQEHQTKSLSIPAVLVSTAIIKGWTPSGLLLIFIAMLLTCAVVILGIRNARNSLADIIESSNKTMVLFTKENIDENDAALTKKINQITTDAVEKLKIKKRSAEKTLTILEGLVFFGVSVWTMFVLYQFKEDIIS…	MKTTLKTLAICVMAGGLVAQSVYAEPLVIQEQGSFSAGGTITTTPGIFDAKKPLDSAGQTYHGDHASVFYQIPENPHKYPIVMLHGAGQFSRTWESTPDGREGFQNIFLRRGFSTYLVDQPRRGSAGRTTIEGTVTPKPDEQMWFNQFRVGVWPEYFKGVRFSHDKETLNQYFRQMTPNTGPFDINVISDAMSAVVDKSGPAILFTHSQGGGPGWYTAMKNDKVKTIVAFEPGSSFVFPEKELPAPMPSAFDTLKGEPVPIEQFMALTKIPILIIYGDNIPDKPVAMPAQDSWRVRLAMAREWRDVVNKHGGDVTVTHLPEVGIKGNTHFPFSDLNNVQIADLVGQFLKEKHLQ	MGATFVNLAGEAPRPTLFMTAIIAFHFAASSQRLIYPILSPVFLR
		>unique/1224/3/Org3_Gene1355	>unique/1576/4/Org4_Gene508	>unique/5040/5/Org5_Gene4423
		MAKIKLTKSAVDAAQPQAQAIELRDTLVPGFLCKITPAGRKVFMLQYRTNAGERRKPALGLFGELTVEQARSLAQEWLAQVRRGGDPGADKAEARQAPTVEELCKKFMEDYSKKRNKPSTRVGYQGVIDRCIIPLLGRKKVHDVKRPDVAGLMEKLSYKQTEANKAFSILRKMFNMAEVWGYRPDGTNPCRHVPMFPAGKSTHLISDDDMGKLFRQLDKIEADGLEKYVIPLAIRLQFEFAARRSEIVTLEWQWVDLENRRVVWPDSKTGGMSKPMSEEAYRLLSTASRQDGNPYVLPSPRHPGQHLTTGEYYGGWCRALKAAGATHVGTHGIRHRSATDIANSGIPVKVGMALTAHKTVVMFMRYVHTEDNPVREAAELVANRRKTITSAKQPPAEATA	MIEYRQGDILQAETEAIINTVNCVGVMGRGIALQFKNAYPDNFKAYAASCKAKQVVPGKMFVFETGQLTNPRYIINFPTKRHWKGKSRLEDIVAGLDDLVAVIRQYDIRSIAIPPLGSGLGGLDWQDVKPLIESAVQPLESVQIAIYDPNGAPSSERMVHKTEVPKMTAGRAALVELMQRYLNGLLDPFISLLELHKLMYFMQESGEPLRLKYQKAHYGPYAENLRHVLNAIEGHMISGYSDGGDMPDKQLSLVPGVAEEAKTFLEQQEETYRRFQKVSDLVEGFESPFGLELLSTVHWTMQYESLTSPEDVTDFIYAWNERKRQFTPRQISLAVDTLHRKGWLTSSVA	MKRLIALALLCALSGCAQKTLPSAFSGKGEPVNTPQIMAELNSHE
		>unique/1241/3/Org3_Gene2992	>unique/1631/4/Org4_Gene512	>unique/5046/5/Org5_Gene4236
		MRLEELPFITEWISQFSTPDVYVVEQMLSSMRFISFEETEVWLQNSINSLLKEIEAKDGRAAVALFPVSKPFINNFNVEKEVKLPNDSSGRIAHSLKNIERSLPAYVELTPRLESMRQKKVKHIIFVDDFVGTGNRFIKSWRTSVSSSIKSWISRGWCKIWFVTFVAHDSGLKKITQNIRALTDSQIKCNLRIDKSPLLQNGSMRAVLKKYGSTLGTPNQTFGYGKLASPVIFQYGCPNNIPLIFWLAPARKTGSSWKPLFVNRSIPTEAYSLFDASLMNVSIAEYFWNGRRYQLALSFLEKLNKFDKKKSQLLMLLTLLSQQYEMKKINSILLLTSDELCVLINELYEGGAIDQQNKITRFGYDIINRLAKPTKKSKLEVEVSNFYPSSFLGFHRET	MTDYRFNLKQCYLLLTRKCNLSCSHCIRSSDPSFTEFISVELCEKIFTEFSSFSKKMQLLISGGEPTLHPKFLDIVSKAYKIFDNIMVNTNGLNFYKLSKLAPLKDKVKIQISIDGDFHTHEYIRGIGTYYKTIENINKLTDLGLKVTIATTVSNNNLKSIPNLDKDIETTKFSCWNIKRIVGYGRAEDNDDISSDDWNDFFIKVKSSFSNNLRISIRPMFSIENIAKSDPINYSNNELSLRGINCGTGRSKLYINPNGSVYPCACMEQKIVGNFTHDSYSIISNELSSLNIAPKKSSICQKCRLWNICQGGCPGISERNHQNGDPRCPIVAKANILMTKRID	MRKKFTLSKNSLDRDKNVAGGGSLKRIMKTFHVTPLTLFPLRKYD
		>unique/1247/3/Org3_Gene1491	>unique/1691/4/Org4_Gene482	>unique/5054/5/Org5_Gene1961
		MLKTKTDIQRFTIPDGKTMKKEIVFNNGLTGLYFAARRNPSGVITKSWRYIVGSNDVTLGTYPAYSLEDARKWHLQQVQKTRQGFAPSKTLTGKPTTMDGLVQEWLEVKCAKPSKPGRQAIWNKHGKALHNVDPEQLTYHHVYSHILAMGVSNASHRMCQIIKMVMLYAFQVHGIQGQQPGQPVYVPQKLSEIHDRKQVAAVVGKMRDNHLQAEQYRILWHSLSNTPSHAAMRFIMVFGTRKSESAKLVWPEIDLKAKTWTLPAERTKTKQERVYPLPDYLISLLEEWSWTKHTLSELVWTHIGHTTMSHSAVRLRETVGNDFTTHDLRRSTASMMSNDAGIDPIVVDLMLGHSLSMVMSKILATYQPKAFQKKVDKAWPVWFQWFEKNIVNQRPKV	MKKFFPISEIVSQYGIDIEFIISEWIKGKFCIFVSFDGELCTMRHALDYERKDKDFKFHLNIKTDPFQNVENPLHEYLSFIPEQPLDDHFRTEYKADWSGPFFKGYDEITYNGRAYGYWYLKPTKTTHFGRDHYILSDQKNYNDLKSKSGVMFVSAFKDFSYNDLVFHKPIKISVDNLFIEKEMFSFVVELYNLFSNDECVVNVDLLEKTLIEDGAYFPPTSKIAIYVLINEVLSRDGRVVPSKVSDFFSNRNMSINQTTVKGWLERPEERNKPFRDSARNNKIINLLLREYCEGKEGMKNPHEIANKLTSLANVNPYNFNIKFTSDVVSKWLKLNQ	MRHFHRHPTNLLHIVCSAMQAATPLPFFRTVDSRKPLTPFHCAM
		>unique/1248/3/Org3_Gene2958	>unique/1777/4/Org4_Gene517	>unique/5094/5/Org5_Gene224
		MRVELINDNLFDEFLYDEYQIVSTDSATNEYDEYEQSQSLDYKRLVGILNENENIVLPAIDKTISIIFYNFSVWTKIKSRVNVFLQEPSRKTFFGKLTTSYQPGTESIYISMNLYEDKNRDKKKCNQVNEHEVYKFLLAADCSHEEATNLVLLHEIGHAIHHQLEKRDGYLLEPTTPEASFLNPFVKLNGECVEGIKYVTRIAHKAITESYADLYSCILVDRLYDSSRSDLIINALHHYRTTHKNESYYSYPSIASYLKDRNGREFNSFDEIHKYMSATIADNAVYDIGRDLSQGKPQLSKFIGVVNILHSLNKRKIDDSIECMKIKFPFANYILSKIDKKNPYGYHQDAFEIGCKHASEWIANKNSSKIRRGIKIVKSTLENKVGNIVNDFSKRRP	MQTTYRLASNTSTILGVEESRGITEVLFPDINYFGHTITITKMFSGYAGHRWKVVSVSHPSVTEIFVDLELREINNDEIYLSQTYNQRNSVISNLHKGTLVEVDYGYIYSIKKQSGDTRSCKRYPDQKQSGEMHKRRLAIVIKASPSGIQIVPITSKIPSNVGDKSIFEVSSQSTQQLIHYNDTTKRSFALCGMIETVSLNRIFAPLAFPVVQKSRKGPERSTGYPNKLTKADKKCLDDALSSSIGFQDYPELKKNYPLIYTENEANKSEIIRLNSVLQNEKEKIVNYEALITLVEEHYQQLYSNKSLQEIQQIINEELHIRRKILEGT	MILRFIFYEFSFYFFRLVPIEIKSRFLFVKIKVTGWRITIHAN
		>unique/1274/3/Org3_Gene2807	>unique/1808/4/Org4_Gene509	>unique/5110/5/Org5_Gene3871
		MAARPRKREYRSLPDYLFFDKSKGVYRFTLITGKKKSIGKDRAIAIAIAREYNYQMRPESVVSINSLIRESGGKSGESLPFSTHVDSIMKRVINDEKPSTNTLADWNNDALRVKEFFCDIASCDIELEHVNAYIQHYHSEASANVQNRKISFLKKLFSYAVDESLMFDNPASRKKMRRVDGKKRRRLSFQDFQRIRASAPGWLRTAMDLALQTTQARLEVSRIKYSIKEPKKGVCGCLWHQVPENGIHGVLYIHRQKVHKKEASHIAIPIGSELKRIIDDSRDRIASPYVVHRLPEKNSNPISQEVNHPTQVSPDYLSRAFSDLRDTVGVASEYPPAERPTFHEIRALAAFMFERQGIDPQARMAHSDAKSTKIYTQNHMDWVTVPHAEIKTG	MLYIYGGDSCQKLSRSLKVNNDLLSIVFSIVSDDRLPLRLDKLKDHLFEDNYKYYHIHILGDLIGLPLTQWRVRNYLINELSIFAKNKNIHIYWYDGDKIRDSHDFFIKNPLHIDKISYFDYHDNELEVKNLDNNTKEISFLNHHGYPENNLLRKTKKEVEYIFSTIAELPFVEKIVCPFIDNLQISTLPKGLKKLDLRGCSNIKIDPICIPFSLEKINLSACDLLAIPDYIYDLKKLNTLFLYKNKLEINGEFKTLSDLEVLSLYRNKINNIELNLIKLKKINLGANPIKKIIISGATNNIELGLRKVNYEDLVIIHDHKLTLEL	MQRFQITVPESMFTEVLRDAENNVGNRVVIHQADGSFAEREG
		>unique/1278/3/Org3_Gene1321	>unique/1833/4/Org4_Gene1868	>unique/5114/5/Org5_Gene4462
		MNSRRPLKAKYTVRLAALALSGPLLLLGCSGERSDPGQQPPGQPVQVNAQTIEPAAHAVISELPGRISPARVAEVRARIAGIVQKRHFLEGASVKQGDLLFTIEPAPFEAALARARGSLAQAEAQLKQAESVARRYEPLAKANAVSQQEYDDAVAAMQTAQARRVSAQAEVRTAQLDLSYATVRAPISGRVGRSLVSEGALVGQGETTPMALIQQMDPIYADFTQPANEVLRLREAIANGKLSADSKGQPPVSISVDGTQYKAQGRLMFSDVTVDQGTGQVMLRGLFPNPDGVLLPGMYVRVSTEQGIDQKAIFVPQRAVLRGPDGVAKVMKISAEGTAQEQPVQTGVMSGPQWQITEGLKAGDKVIVDGAEKLAPGTPVVVKAPAEQGENKK	MSIKEIVTGIIADKADVGGIKHVYYAACGGSYAAFYPVKSFFETESKEISVGLYNSSEFINNPPAALGENAVLVVASHKGNTPETIRAAELAQRRGVPVIGLTWLTDSPLVEFCDHVVTYSFGDNKDIAEEKTLKALLTGVEILNQMEGYAHYDKFLDAAGKIDKIVKQACIHVEKRAQAFAEEYKNDPVIYTMGSGASYGSAYLQSICIFMEMQWIHSACLHSGEFFHGPFEITDANTPFFLQLSEGKTRALDERALTFLKKYGKRIEVIDAKELGISTLDASVVDYFNHSLFNNVYPVYNRALAEIRQHPLTTRRYMWKVDY	MPFGILNISHCDKKACFILVSRYSHTINMALLNKSDLRRAFL
		>unique/1298/3/Org3_Gene4066	>unique/1932/4/Org4_Gene2771	>unique/5138/5/Org5_Gene4411
		MLSREDFYMIKQMRQQGAYIVDIATQIGCSERTVRRYLKYPEPPARKTRHKMVKLKPFMDYIDMRLAENVWNSEVIFAEIKAMGYTGGRSMLRYYIQPKRKMRPSKRTVRFETQPGYQLQHDWGEVEVEVAGQRCKVNFAVNTLGFSRRFHVFAAPKQDAEHTYESLVRAFRYFGGCVKTVLVDNQKAAVLKNNNGKVVFNSGFLLLADHYNFLPRACRPRRARTKGKVERMVKYLKENFFVRYRRFDSFTHVNQQLEQWIADVADKRELRQFKETPEQRFALEQEHLQPLPDTDFDTSYFDIRHVSWDSYIEVGGNRYSVPEALCGQPVSIRISLDDELRIYSNEKLVASHRLCSASSGWQTVPEHHAPLWQQVSQVEHRPLSAYEELL	MTISLYTQTSAPNTAAATSVSPLEQSGSSKTKFSQTRTDIYQIVTDNIIAALETGVKPWSCPWQRVPDMSGLPSNFATGIAYSGMNIMLLWCSASEQGFSDSRWMTYKQAQAVGGQVRKGEHGTTAIFYTTLEKENEDGEIDHIPMLKTFTVFNVQQIDGLTLATETVSPEATFNPLPQAENLFRKSGANIIEKGQNAFFRPSTDEVWLPERHLFSDAANFYATGLHELVHWSGGKKRLNREMKGKFGSADYAEEELVAELGSAFLMADLGIVGEVQHESYIASWLQALKNDKRYVFKAASAASKAHRYLMDKF	MPRALAWGATFEALEPMLFGYPLFKGDNSNVFLFFVLSFNT
		>unique/1310/3/Org3_Gene2954	>unique/1980/4/Org4_Gene2800	>unique/5268/5/Org5_Gene1592
		MYLGILSSIGHSNLFRFLASAVISTVILSLLFIRDYKVKDIDDKFKNLPNVLSEYDPINLTHRLVKLDEINGIVSANEASIAYGAVNEFLRKVKETCKLGDATEIFLHCANGVLGNNFYYKVANTVARAYANHYSDCDLNVYLLFDAARLFNKKIEIVYAPRHAFVSFISEKYESRFYWETTENGNKGALADLTKPLYNKTINHFYYSPMGEDLVEKVYPILSLTDIDEEKVDTLFNSIDKTMADNPLFLDFYFSNKEDKKELNKKDIYALYGEIQNDISAVDKRLILSRYLIANEKRDEAEEILNQIDDGACKLSCMKVRKEISYIDKIQFHIMKRFESKNAKLSAYDIKIFLYINLFFYFIIMLVFLVAIVIKDVNEYKHAKRNDE	MRRDDLSDLAVFLAVAEEHSFTRAAARLQTSQSSLSNTIRRLEARLGLRLLNRTTRSVAPTQAGEQLLNTLRPAFADIDARLTKLSELREKPAGTIRITTSLHAAQKVLWPAIARLLPDYPDLKIECSIDAALTDIVTDRFDAGIRLGEEVDKDMIALRISPDLRMVVVGAPAYFKSHPVPETPHDLTGHDCINVRLPTSGGLYTWEFAEDARQLNVRVDGSLVFNDMSMVIKACYEGFGLACVIEDQVKELVADGTLIQVLDDWCPFFPGYHLYYPSRRQPSPAFTLLVEALRYTPQKPASRKRGKVVM	MRSVEHNVCVDYVFGLSLSDKILVCEEPLPSEGISDAP
		>unique/1373/3/Org3_Gene2990	>unique/2056/4/Org4_Gene2083	>unique/5288/5/Org5_Gene3932
		MTQWNPNLYRKEGLSKGYDVHYLTSLVEQGEKSNEKNFPVVFSLAHLANLSRTLYSDLHIFVSRTVIQRKDFPYKNFPIAKRTGGKRWISIPTPALMAVQYWINQNILNKAIPHSAAYAYVPNRKIIQHAQRHCGAAWLIKIDIKDFFGNISERQVFDVFLELGYPKLLSFEMARLCTRVTPNRKGKRWRNTVTEHTISGYDSKFVGSLPQGAPTSPALSNLVCMSLDKKLTSFALSQGATYSRYADDLCFSLLSGCRKNALYIKKEISKILREHGFSDNSKKTRIVPPGARKILTGLIINDELPKIPKEIRDAVRMHLYYAKKNGIASHCTARGFRSVIGFKNYLSGMIGYISSINPQQGKKSRIEFNSLPWIDFDL	MTKNIELNFDHPDSESAENTENLKKHWEGLTSTGAKWEIYNGDSAQIIKDLPSGSIDCAITSPPYFWLRDYGVDGQIGLEDSVQEYVDAIADVMDTVKEALNPEGTLFMNIGDTYYSGKGQSQGKDRKSNKRRFGLRAVDKSGGMGIGLQRKSMIGIPWRVAIEMATRGWVIRSSIIWHREKCLPESVKDRPSRSYEYVFMFVKSRKYYFNKQELIEQKVEEDMWTIPARPKSGGGLDTAPYPDALVERCLKIGCKPNGTVLDPFLGSGTTCRVAAQMGYSSIGIDLNHEFCEYSALNMENI	MSFLFLGMTSRSPPLLTNICDFVRDFQKKLTKKYQRYA
		>unique/1411/3/Org3_Gene1484	>unique/2057/4/Org4_Gene2089	>unique/5338/5/Org5_Gene2981
		MTKFVAIKIHYDHRKSLTPYLKYSKAPTHEEYAEYLDLFHDEGIGGAGFHECMNFTVSEDTPTKIYLPPTCIPGEKYHDEEIVFFSFTYKYDKEMPSSIIGVHAGARLISNGKDSIVRNDIETVEGAEQFHYHAEAPSEFTTLITPTIKYDFKDGTYTPEYASWGYGLRYITEEHAANIIDAALLGAKKRLPASSISESIILEREISVLEAIQRRYSLPSSQINLQPEKTNKSNSGWNNTLPDKKIGFLGEQFVYEQEVDYAIKNGIPVSEVEWVSQSDPQSPYDIKTVRITPYGRQEHFIEVKSSRCINESNIYISSRQVSFFQRHESCSTLKFVTFISDTQVDTVREYTLKELMNEFELVPIKFKLQNLKR	MYSLAPYFIRCYNKNNESKNVEERYDFLNRIGQYDLFSLLEQFISLHKDFEKIDDSKETYKFHHVTSKPKERVISGWMSLGHYGIKNDIINTDDNQLAFSKEENHADVKNFYFRFYIPLESRKGICLLYAYKKDGIKSVFQAEFSKFFTAKTNKNIQINPLTYDKAVLPWLEAETKEIRVIGFTAPRSIEDSISSLGDIDREYVLKPKKNGTFGKFKNFRNKGSEQGKLIEMLSDESTQIKVKVVMEGGTKTFSVGKSERSTMCQIEIDLEKVKVIAGNPEFDSLDSWASDLIKDLCKQIGL	MKEANVQVQDCDSPILLASSPLMGMDARIPVIAVIGL
		>unique/1465/3/Org3_Gene2796	>unique/2077/4/Org4_Gene2791	>unique/5345/5/Org5_Gene443
		MSVKLSAFVWDGCASSGMKLASVAIMARLADFSSDDGVCWPSIETIARQLGAGPSTVRTTIAKLEKDGWLTRTQRRKGNRNASNMYQLNVAKLYAAAQSHLSDSDPSKSDTSKSDASKFDPSKSSKKGGFDPSESDTSKSDASKFDPSKSSKKGGFDPSESGGDPSVRSKQDPSDKKTIGQPPPAADPQSDNLRIDYRAVLDAYHTTLPEIPKVLEMTDDRRKKLRALWTKYDFNLERWFAYLRYISKHCRWMLENRADTSTGRTWRKKNFDYLITEKCYLAVKEERANDLPKVECADVANREEAFTRLVSSKGKPKNRTEEIAQAEAGRAGLGRMNAFQAMQAWKTIWASAAHQAGEEELRRLAS	MLDQNGSAALALLVAKTATTDGDYETAIPALSLYRRSAATAPMPCIYGLGLGITVQGGKRVTLRDKIFDYGPGQSLVTSVDLPVVSHVTKASTDEPYLGIRLNLDARLISQLVADMDFSHTAKTCSTSAISVVELDESLLEAICRLIRLLNDHTLLPHIAPLIQQEITARLLHGQHGPTLRPLVTQGSPGQQIAKVLSWLKLNFTQDLSMEELAAKAYMSPSAFRQHFRSLTDMSPLQYLKNLRLQEARQLMMNESLDASSAAVRVGYESASQFSREYTRLFGAPPLRDMKQLRKYSSSK	MRDSVLTFPQLTFLRLQERFRHLLALLAEQVKVHNPQ
		>unique/1479/3/Org3_Gene1162	>unique/2107/4/Org4_Gene2802	>unique/5354/5/Org5_Gene516
		MASLQVLNAIAVRITPPEDEQKDWSYKLGALWPCDQDEVITFTTKVDARFQRSSKSYAKFQKPYPGSSFPSKLTNFLEKRTSFEVFVDDFIQKKLIISAKQSRASNGAILVFTHYQLQHEDDEGNVHKDFERLLVLMLKNTDALRFKENLQLNPVDIIDLDKFLQGARVDITRFMSEDDEDDDKNNLCFIRGTGDVRKYFTESIGAEDIISNKTSSEQCIKALEEFSHQKDFGRALREKIESKVQELFNNCKRGQSITLDKIQTQIDAIIPVDLAEHKNTFVDFVNENGFEVNEEFEVSASDKKQYEWLDIETSIAKMSVKKHQIGLPGSNRPIVFDAETNEVKLTQKIDDPIIIARLKELANE	MTGKSPLFTLNNGVQMPALGLGVYQSGSDETVAAVVTALAEGYRMIDTAAAYGNEAEVGQGIVQSGIDRSEVFVTTKLWISDYGYDSTLHAFDRSLRKLGLDYLDLYLLHWPMPTDFDATVASWKAAEKLLADGRVRAIGVSNFSAQHLDDLLTQVDVIPAINQVELHPFFVQQELQDADARRGIITQAWSPIGGVKRYWNTDNCDVQDPLVHPIILDLATKYSRTPAQIILRWHIELGISAIPKSVKASRISENIDIFDFSLSGEEVKAITALDTSTRGGPEPEEVNTELFSFKIED	MMRINAANKNSFLFKNECHFASISVAVHIDTNSKN
		>unique/1480/3/Org3_Gene1342	>unique/2115/4/Org4_Gene2747
		MTTVYIDESGHSGDMINSGNAYDFKGQPYFALAGIGLEDGHDWEDRINELRSRHRIPAGELKSKSLTAKPRFSADVIHGLLDQRAPLFIELVDKRFFICTSITSFQLLPACLGYTESVKLHFIKNTVADFLYFHASERVFDTFVASCLAPGDGTLRASFAVLRDMATDLGYTGSAVQIAEGIAHMVQEAEAEYGEQRDNGGEAWSRFLPPPDLNKHAKQVWMLPNLTSFTSIYARMNRYYGRRLAGIRLVHDQQLELENILRQGKITAESLSHSVDLPYTPQSDYRFEEEASIEFAQSHEAIGVQLADIVAGTVMRYFRDTDAGTQVSSELREAMMRLIDEGDERRGYGLNQVVATANVRHAE	MFTGLSAFPLTPVTASGVDEQGFSKILDRLTAARVDSMGILGSTGSYAYLTREQRKRIATLAKQLAGDIPVIVCVGAVNTDAILHLADDAQAAGADALLLPAVSYQSLRDEEVFALFETVTRHASVPVCVYDNPGTTHFTFTDELHGLLSSLEGVRSVKIPGVPNSPEAATERVDALRKHLRTGVTIGISGDAYAGLGLNAGCEVWYSVCGGLFPETAKQITEAAAAHDYARVTALTTRLEPLWALFRKHGGSIRVIAAAAGVLGLTDTDCLPRPLLPLSAGDISDIAQVITMLDLK
		>unique/1513/3/Org3_Gene2940	>unique/2185/4/Org4_Gene497
		MNALGYLSLMREKGISFRVVQHGLKFSNLSSARGWEPLLEHYSEINSTDVNESVRGLYLSQLFFGQRTVYFSQISEDEHGDLSANIVNVCDVIKEIFNSSTHTNLSLYRNSYPLPISHDELQSVPLTNPCPVFLDETDEMLRIIFTYPRAYKERVIIDISEIDLSDDGESQFSGFDEIIGVKSGRAQSFDCVQLDKNTGVIQFQIDHSRNILKDEMDSAARRYRHMLMDGYRDMNNISIPMESINIHPKIDELYDSDDGRIHNLEHATATGSVKTEKMRKREDDLRDEQFHLAGLDAIDGDTNNFCITKQWDGECGSCLKLTIDGGVSLAARSNPKVDCATLEGCITENDFNLLISKVL	MPNHENLREIHASLSVLPDSLHQRVIDHIEQLIQYEPVIGIMGKTGVGKSSLCNALFQGEVSPVSDNSACTRQALTFRLSSGQRSILFVDLPGVGESEDRDRDYAALYQHWLPRVDIVLWLLKADDRALAIDQHIYRTVIGERYRDKILFVLNQVDKLEPSHEWDWDAQQPSLNQSGNIYARRVTVRSTFFPTHPVCAVSVKTGWGMAAMVETLFQCLPPKASSPLSVRLQPDWRSVAIENRAQDDFAQSVGDVLDSMIALPVVPAPLKMLIGGLKQTVVSLARSLWSLLF
		>unique/1546/3/Org3_Gene1354	>unique/2197/4/Org4_Gene2086
		MTRRKVSAPSPAAPAALLGDIRVLIEAARQRAASAVNSELTMLYWRIGQRIHTQVLEGRRADYGEEVVSTVAAQLVHEYGSSFSVKNLRRMVQFATTFPNEQIVVSLIRQLSWTHLIALIPLKDPLQRDYYAQMASAECWSVRTLRERIDSMLYERTALSQKPGETIAQELATMRDAQRMSPALVMRDPYILDFLGLRDTWQEGDLEAAIIREMEAFLLELGAGFSFVARQKRIQIDDDDFHLDLLFYNRKLRRLVAVELKVGDFKAAYKGQMELYLRWLDKHEREPEEASPLGIILCTGKKREQIELLELDKSGIHVAEYLTSLPPREMLSERLQQATARARLQIEKRDDIAKR	MNVFSLKKNKGYAYPLTQAKYDKETNKTHPYLQNINNKTQAFALCPACHNPVILVNRIVSQTKSNTLYAKHCKYSVADLADYDQPSYDNCSLANPSNFDDKIKRPLKHATNNIIKDAIINHFDLLIHHLESAIGITFDEQLLKKTLEDFDSCDGYLYHSINLYNLPIAFLYVIEAQDLSLCKISSDIYDKIKTESTLFYFRNNSNFSNKNLNIFQKNNSVKANISFYLYDHTLSSEHTEESVTLCIFEKDINDNHEKKLFEKVIDFNGSYYVNTLNKRNRYKELAKSIIS
		>unique/1547/3/Org3_Gene1310	>unique/2275/4/Org4_Gene1869
		MSAVPQTPSQRSSTAASLDRRIQMLRTAMGPVIAAALADPDVVEIMLNPDRTLWVDRLSSGRAPLGVELSEDDGERIIRLVAAHVGAEVHRGRPLLTAELPETGERFEGILPPAAPGPAFALRKRAVSIIGLDRYIADGILTTGQADFLRRAVRERQNILIAGATSSGKTTLANALLAEIAATGDRVLVLEDTIELQCAARDHVPLRTRAGVVSMTELVRATMRLRPDRVIVGEVRGGEALDLVKVWGTGHPGGIATIHAGSALGALLRLEQLILEVAVNPPRALIAEAVNVVIHIAGRGRKRRVESIARVVGFDGVGYRLADALETPFPELTPVPLAADAAAPSLSPDQPGELP	MKYRVIGIGDNVVDKYLHTGLMYPGGNALNFSVYAKKLGLDSAFMGVFGDDEPARHVQDTLRHLGIDTQKCRRYPGENGYACIDLIDGERTFLHSNKGGVLREHPLVFESADVDYISGFDLVHVSLNSYLENQLEIIKQQGVLLSFDFSMRGTDDYFKQVCPFIDYGFVSCGHLSEEETKNKLKMLFDYGCHTVVATRGHEGVYHYDGDDIIFYRPNYIKPVDTLGAGDSFLTGFLVSFLFSDEKSNGTKKEKILTAIEKGNQLAGETLRYFGAFGYGQLFIK
		>unique/1559/3/Org3_Gene1351	>unique/2277/4/Org4_Gene2814
		MTKGQQVLLKGPRMEELLRSYFLKAGYYVVRGVPFVYEGFDVTDIDLWLYSRTSSVSREITLVDAKNKKTPQAIERIFWVHGLRIATKATNAVVATTEKRQEVKDFGRELGILVLDGTFLSKLDKADAPNALRLSDEEFFSRIDEYSLSKLDGDWRGRVAHSKSLLAKSLSFDSCNEWLMQGKFFVEQSITKNNQREVALRCLYMVCSFIAVAVDFCMKEISFHEQSERSALIKDGFTYGSKGSAGLKKILTVSMGLIEQHANDGAATARQVRSSIERQLADLNTAVLGEFFAKHDVSRTLFAVAKEFEQLAMSRDFSSDATATPELRSMLYCLLDYWEVDRVMFSSVLKDS	MQTVKLNNGIEMPLLGFGVFQMTGASECERSVIDAIDTGYRLIDTAASYQNETQVGKALKQSGIERNELFVTTKLWLQDTNYEGAKAQFERSLNRLQLNYVDLYLIHQPYGDVHGAWRAMEELHQAGKIRAIGVSNFHPDRLADLIAFNNVAPAVNQIEVNPFNQQLHAVPWNQSYGIQPEAWAPFAEGKNDLFHHPVLTAIGQKYGKSVGQVVLRWIFQRGIVSLAKSVRKERMEENINILDFELSSEDMLQIAALDTATSAFFSHRDPAMVEWLTGRKLDV
		>unique/1563/3/Org3_Gene860	>unique/2293/4/Org4_Gene191
		MPVEQVKFSFYRIDECGYYCRGQNEPVFGSINEILADLRDWGRNLSIENTKLYDPVDGSNYLSTYLFNISQSDNNWLLTTWNETPATEAGVASVIKNSRLDAPGVVMNSIQPNSIPGYATYFWFLPEHNIFASVRFQKRTQTGQPQMRKYIESALSLISSYVRRTELSDGTQQIVGYADPTQQDIVQPQPQPRFRTSIAYDAGDRELIRQNASNISKIFRKETLKLNHPDERRWWQLALNRLGISAGTDYNRTDDVNVKYEISPDFFDLQQVDAMIRDWDESETTRSDWDDYGFGFVGSSTKPHWLSHSTLTAGIELDVVRDNEEVVNVDTLLRLLTQHKSKILRQIREEE	MTQRGAVFIGPAVVNLDFPAPDQAVLPGVLWGSIDAFPSPAYWAYQVLARRLEVSMVNYKLGNTLKEEVAACLLGGHGIPAAVGMAAFRKLKALGAFEHTAPTEDHLYAWLSEPIDTGKKIVRYRFARQKSRYLAAALSKLESENPPLDTGRLLRDWLLTIPGIGYKTASWIARNWLRADDVAILDIHILRAGLLAGFFPDDLTVERDYLKLEALFLQFSEAMGVKASELDALIWYEMQASSETVFSLIDNWRGQPLSKLKIRSSGTNNRQSNSRQTVLQF
		>unique/1594/3/Org3_Gene2966	>unique/2316/4/Org4_Gene511
		MAQYWWKDLLDRNNVWQGLELIVQGQAPSKQSIIEMLSGHHGRMSLQVRGKALFWASMLKDHSGVWLVFNADHPHQQGLLPPVTSNEVESVKKQGEQAWVSEWCRYFARQLMQTSDPLLPNRRWLLRAMPPVVRHAPYTIQQTATVENWHFHSPASTGNIGCDWALYGEDFPDLTNPQKVSLVDCWWGGNLLLGRYAVKTNTGRLKWWRKKCREGTLPPVLVWYVAGLASFVILDGHYRLQAAIEEGIPPLFLVLSELNERTFPPAPEHQERILRSLEQQQRTNPECSVEGINQTLINLYDTRYLYASTHSRAVLGKGESWARDVKAYLYKYNCEENLEKILNRVND	MSNFFSYLDAHHFFEKHWNKSYYKFTTDFQKPNTKKILNDVLTSNIQYPDFRIIQRGGSINPYLYTKSDNNSLSNQISNDKFKVLDLTGKTIKISSLNQYAKEVKFLENDVSNYFSGINISINGYFSEGKSQGGSSHYDFHHIFAFQISGKKKWNIGNIVENNPHRDFGHRLIENTDYVGTVTTSPGDVLYLPPGIWHDVSTEDSSVHFAIGIQTPRIFNLLHQAIKHISKNSSLFRKDLPLRYIDNLEKVGLTNNEIEEILNILKKHLMENNGAKFL
		>unique/1639/3/Org3_Gene2791	>unique/2411/4/Org4_Gene2101
		MRALLRTVTVPELGQVILRPGKELLPLFTGRVLVVSEPDELKGLPSGLLPSQEQQLANDPRWRSFLTNERVINAAGGTDSLINWLNQAMVCQRESDYHSQHMTTLKYGNSGIRLCWHCDNIVREHETPVLNELADRNAAEWVIHQARTWLTLPEGHQVTTHELSWWAVVTGVSDLLPQHAIRISLRMPAPEEKPGPQRECDIEWTTPVRDIIDERIERVKPVIRLVEDAEPPAGFMLRPKLQRMECEKYTRWVKSQQCACCGAPADDPHHVIGYGLGGMGTKTHDLFVIPLCRRHHDELHRDVAAWEAEYGSQLLLLVQTLNRALGIGAISIGKLKGVENA	MKVVSPYEELKSWFSLENYEQLKSLTIKELHTELAFREAIFDSVNFGWEDDNQNLRSVLEGNPILSRQDNNHGHFGKGQRHVAQVSFGDIKKLENKLIMFSMDFFEENGDFKKELKKKPITKTMRDFFLNQNSSKMYVSFDLRMSSDEEIITALQTMLPNLRKEYEIEPVKTEKIGLAKIRKLVDYNVIPMMDLLIWAKFKKVKISNMVLSRVLYPDFTSEIRGEDHIKDTDRPVAEKSLNGETTRSLEYFISKNSHLLNIPISELGSF
		>unique/1689/3/Org3_Gene2788	>unique/2437/4/Org4_Gene2810
		MANSELVINTEEEAFAFIENYLSGYPLPEHISFDGWPNLSFRLEGENFQQSITPSVMKGFIEMQGQINKSYALAKYGVPDPRKLTKDEREDLEIKVKVEKGSSVFNVDINGFLTKLGQELVGKMSPQEIMVTLLGAALIWGGASIFKRFLDNRKEVRLAEISKDSDKEHLKTMQSMSQEETKRMELLTKFINKTPLLDNMERMSYDAKTEMVKSFVRADEAEIDGVTLDSEMAKELTTNARKRSTEMRIDGVYRIEEVNNTDPEAFKVKARNIHTNKRLTCLVQDVFLDESGNKDSLVKAEWERKPVHLSINAKHVDGEIKSATILYVRDADEDKPE	MSSVTLTYLKNLKQRGEKITMLTCYDATFAHELSTAGVEMLLIGDTLGMILQGHDSTLPVRLEDMVYHTACVKRGNNGGFIIADLSFMTCSSPEQALHSSAQLMQAGAQMVKIEGGEWLCDTVRQLTRNGIPVCAHIGLTPQSVNVFGGFKVQGRDSHQAAALIDTAKKLEEAGAAMVLVEAVPASLGRALSGAVSVPVIGIGAGPDTDGQVLVLHDMLGLSITSRAPKFVKNFMKGQHDIQGALKNYIAAVKDGTFPAAEHCYSE
		>unique/1756/3/Org3_Gene2803	>unique/2474/4/Org4_Gene2820
		MSNFVDVLKKKKINHVVNDNGSIVIEGDLSLLGRTDITSLPDNLSVGGSLDLQDTGITSLPDNLSVGGYLDLRGTGITSLPDNLSVGGYLDLRGTGITSLPDNLSVGGSLYLRGTGITSLPDNLSVGGYLDLRGTGITSLPDNLSVGGSLDLQDTGITSLPDNLSVGGSLDLQDTGITSLPDNLSVGGYLYLRGTGITSLPDNLSVGGSLYLQDTGITSLPDNLSVGGSLDLQDTGITSLPESFTCDSLYLDPQRFDNVTYRENCGNSSRTIFAAWVQGNFRIAAGCFWNTLDEFESAVDESYSGDAAETYKQAARDCVAKLTEKLNKAGE	MKILVAGATGSIGLHVVNTAIEIGHHPVALVRNKRKVKLLPRGMDIFYGDVSMPETLTELPKDIDAIIFTLGSDGQGRIGARAIDYGGVRNILRIFQDRLVRIGLMTTIGVTERLSTWNQSTEVHDWKRRAERLVRASGHSYTIVRPGWFDYNNDDEHRIVMLQGDRRHAGTPEDGVISREQIAQVLVNALTNDEAKNKTFELVAIRGEAQQDLTPLFAGLQTDNPEKNDGILDIDNMPLRGEPECIINELNLYSKKLTNLKP
		>unique/1762/3/Org3_Gene1302	>unique/2556/4/Org4_Gene2580
		MNLPFRFYVLPLILLALAGCASQSKPPPSISLDESVQAQPLPEPPKPVEVIAVPEPLALPAQLKLLPEGDAAPTVPEPADEKVRVSRANAEARIAPTREGYVNAIQVWPYSDGALYQVYAAPGRVTVVSLQPGEELVTVAAGDTVRWIVGDTSSGSGADLRVNVLVKPIRSALKTNLVITTSRRTYLLELTSTEKVWMASVSWDYPKDRMLALQRQAQAASAAAPVDTGLSLEKIRFRYAVSGSNPPWKPLRAFDDGEKVYIQFPPGIAQGELPPLFVIGAQGDGQLVNYRFRPPYYIVDRLFGAAELRLGGDGGDVVRIERTDGVARRN	MDNLPTLIPVMAGSIDGQPASLVSAKRLHVFLGVGRDFTNWIKGRISQYGFISDQDYMIVENLSSPKRASSKSRQQIEHDYLITIDMGKELAMVERNEKGREVRRYFINCERQAKAAANIPQTLPEALRLAADMAEKAGHLENQLMAIAPKVDFADRVSEISKGISIPNYAKAVGLGPIKLFEWMRSQGILITGGQRHNLPMQRLIDSGYFTVRQGTYETNGEVRASFTTMLTGKGEQWLTKKLIAGGVLRGGIRC
		>unique/1930/3/Org3_Gene1315	>unique/2604/4/Org4_Gene487
		MELRHLRCFLAVAEELHFARAAERLHIEQSPLSRAIKELEEDLGEQLFVRTSRSTRLTRAGKLFLEHVPRVFAALQQARDSVKAAANGFHGQLRIALSDGITPSRLPALLALCRQEEPEVDIRLFQVTLSQQLKGLQDDLYDVGFAQSDEGSDGITAEAVWNDPLMVAVPARHHLLKFKRIPLDDLLQFPLVLCDPQACEGHARQVERVLRRSDREPLIAERVASFELMMVVVSAGFALGLAGAPHIAAGRELGVVARPLAGRSPMLTTYLLRREGEVSEVLSRFIERVQAIDLPEGTRPPLPLQPDPQEEIEL	MEHINYSLVEWLPAFFKQWPKNITCAREPDKKINIDTAKLAEFFNQLPEPLEAVQHRSLSFDPWEVAGLGRKEVRNTAVLAWLLDPEGTHGFGRLPLQVFLQVIRYHRDDIPADYHRYCRVQVETNPTGDNTNRVDIEIDADNFFLLVEVKIDASEQQEQVARYCTDARVRATSRPWAVVFLTPHGSKPVTSGVAFKPEDVPCLSWRHLATTLEASLQSHVKELHSQGKSSSSRQMAAHAAFCFLNRVRTF
		>unique/1946/3/Org3_Gene1480	>unique/2674/4/Org4_Gene494
		MDFFTMNQTELKAFVGRSFLTEAKEKCEHEKNKVFLDEKLTESERLKYLFNSDIRINNKKLISAHLQALHTQLKKILSPELETTFKTEGLFVEFSKGITIFDHITKILAMQGGTYGDNTVFSNNFYYDASRAVQKMPHPFYQGDLEIACIPMKLRLAIELYIKNMIEFKSAKKKNKKGKDINYTVKISELLDFFQDKRFVKYVNLPVSIETLKVINSWSNKFIHSGVIPLPWQSLTAIDMLYPLFKIWSDNKEFSLNGFNFINLNHSQDALVKDLNIFLSEKSKSFITVELYPRCERPFEGVYASRTKHIDHE	MFGNAFGVKKRRSDEAEKPFWISYADLMTAMMVLFLVVMVASLSSVTQRIQRVEQGEKTRGQDISKLCERLELHARNVNKTIVVDCHDNRISFGEAGRFDHNRFFLNAEGQKALQDVVPLVLEAADSEEGKKWFKQIVIEGFTDTDGSYLYNLHLSLQRSEWVMCSLLDSRSPLQKGLSAEQQIQIRKLFLAGGVSFNNAKESKEASRRVELRMQFFGLKDKRNGADEVDFPLVVNKEVCQLVMP
		>unique/2016/3/Org3_Gene1347	>unique/2768/4/Org4_Gene1867
		MDRFQQLNYEKDFRIAFLESKGDGFQRLFEKLMSKAHLNDFMACRPWGNVGDRKNDGYLPSARILYQSYAPNELTAAEAIKKINEDFDGAKEHWEKYFDEWTFVHNAQDGRLGPHIIEALAKLGQDNPKIKICHCGYEEMLAKFRQLSLQDLESWFGPSLTMEANVNLGFGDLVAVLTHISITPVPTASEVKDVSRGKIEANLLSQAVADFLKIGMQKSTLVAQFFNNWKNPTYGEQIAQAFKSEYVMLRDQVPALHPDEIFGRLETWAGGTANTTPTHKAAVLAVMAYLFDKCEIFEDAQAVGAA	MAKLDTDSALPLYKQLEQKIKSAILDGKFKAGQKIPTELELSQNYQVSRITVRKALESLTRDNLLTRVSGKGTFVSAEKFQRDMSGIVSFSELCRSQGRKPGARTIKSVIETPAKDVQDALALSEGERIIVLERIRYADDVPVSLEITRFPETFSFLLTEDLNHQSLYQILRDNYDIYFTRSAKVIELVYASYDVAHYLAIPTGYPLISITSRIIDNHGKASCSSTQLIVGDKIRFFV
		>unique/2176/3/Org3_Gene1462	>unique/2781/4/Org4_Gene2081
		MKSGEVIKAAKQWFRLSNYDVLQEITLNDLNDELSRRRVLFRYDSTNEQSPRYQRYLEEEAKILAGTPLLISSTKSMPPSPKKKNPLADATLHVQHMTVGDISRYESDLRKLNLLQRSDASLDAPSLPVSREQGKQRLTDIERLNDDHPLYLWLNIKRLTDDEVIEHIKIMLPQWRKEYGITEPEIGLFRFGLSTIKKVISMRTIPMLDLMLWANHREVKISNEQMSRLLYPNDSEVIRGGAQIKDTDKPFAEKALTREFARLFNLYLSKDSYMMDVRVADAMKMNEKEEEN	MYRVNQIIKTISKMNSYAPYNQIHKKSNLLRKVQVYSFLTSLFSLVVMVIMAVIYKVCDLPKEPFILPAFVLYALNSVAGIIYLFTPIIPGVKFMLNFKKEIFNDLICEIDNDEKNIEELMPYSIAELNYSIDWLNIKIQRVKLRINDFFGEKTAVLSIIGLAYSAIQGFGGLDKLGDTISKGLFNSGTANTLIVFGLALLLGLSLGALALKNVANHFQYLKEMIELAKKIKEKDNI
		>unique/2177/3/Org3_Gene2989	>unique/2782/4/Org4_Gene510
		MTKKMSKAEIVEALSEWFDVSRYDVLKDLTLEQIYAELERRIFAYKARQQWETAGEENQLLAIHHDALIRSGKVIRDTKWLSDSYMLAHSYAVRPMTRASLFNYGRAMYRLENNVAKDDVSVSSEYISEYLKQGGLNPANKMLIEIDLDEASSDDLAEHLKVLITQWQKHLKAPKPPEKDFRFGHKTFQKILDYKIIPLMDLIGWEQLNNQKIPYPVLAGILHTDMRYARGSEQIKDTDYPLAYDFLNNDNYFKSLNDFFIKNMHVKSSDILAVIGMNDKPEDKKKTRDVR	MVLNFYEENKNIYTEYFDQLEQFLSGISYSIYLRGSANKPINHSLFKPWDIDIVLFSYEEINYKVVDKIRESTFYFNDKISHLGYPYIDICFFLKPKDNSADKYLLYLLKKDSYVIKGFNNKLVDNAEKPNKSELRELYNKNLDIIIKKHRSLPIEKNSIDYSRKIKNLIKSISRCGCILLLLKDDVFTRDVNNGLDALHRHFADNVFTKIKLPLTELNSSSDIDLALIKMRDNKVE
		>unique/2198/3/Org3_Gene1318	>unique/2792/4/Org4_Gene2784
		MILVTGASGQLARLVIEHLMARVPAQQIVAAVRHPEKVADLAARGVVVRLADYDKPEHWADALQGVEKVLLISGPDVGARVRQHQNVIEAVAASGSVRLLAYTSMLRADSSKVPYASEDRETERLIRETGIPHVFLRHGWYTENYTMNAGYAVQEGKLYGCAQNGRISGASRSDYAEAAATVLTAAAQIKSVYELAGSDSFTLSEVAAEISRQSGQPVEYIDLSEQDYQALLENYGLPSGLSKTLALADTGAANGDVYSESNDLELLIGRPTTSLAKVVENALKAEAGKE	MKAKYKFQVIQDTVMLLILLSLMGFHLWGENIHEWLGVIFFFIILLHNGLNSHWFQKLFQGEYSALRFLQVSVNILLMLVLLSAMLSGIMLSRHVLPDLPIHSTSDLVRKIHMTSVHWGQVIIALHLGLHWKMLANFFCKIWSISPISLFATKIMPLIFIVISIYGLYTFIYRDMLPYLLIQVDFAFFNFEESKAIFYWDFLAVIIFFSYLTRYLLWLFLFRGKSREGNNGKDVPS
		>unique/2204/3/Org3_Gene2962	>unique/2826/4/Org4_Gene499
		MLLEDNIYNMENYKSQIQKYALCCDDFNDGVYRNPKEKALAKKYIGFNNRSFVNGLVFDIDHENGAIAWDLADLPRPNTIIQNTRNGHAHLLYALKRPVLKTDSARVKPLKLASIVQCGFTERLCADRAYADILMKNPVNEAEWRTTWTDTAAYDLSYLAEFIPETIKNKNKKQSPVYGLGRNVNLFEDLRKIAYKDVLKYKKNKTYNDFYHDMFSIATMQNNNCNPTEPLPHNEVKQVCASVCKWTWRNFSKEQFSIIQSRRGMNNIGKKKNIKTKIRLENALEVLLK	MAQADRRYDRLAVRLSLIISRLLAGETLSVRKLAAEFGVSTRTLRRDFRERLMYLDLEYRNGLCRLPEHHNPARHEQDVLMFVRQTGMGSVFPGLDNRLVNTLLDSGEDAPCLVWHPPQRGTPTLPGHFYRLTRAIGEQLRVTVLADGQRYDGLSPYRLICLYGEWYLVAESLGHLLVLPLHEIHGVTVSTESFQRRDDICHLTTQSGFITALPHFRFIHDVLTTFGTSPTT
		>unique/2242/3/Org3_Gene2976	>unique/2828/4/Org4_Gene2775
		MMNEIDVDLDLGLNPFCFETELKIETRKKNLTVSRGTELIERKDTSKSYFANIVHTQEVDKEEFIKLYTSQIKAYFDLTKTAYKVFFIFLRIYQDAIGKDHFYLSCKKAMSLAEKIDHFVLSESIFYRGIKELIEKRIIAKTNEKNWYFINPAIVFNGDRARFVSEIIKKKEAMEEQPESMVSNNGGGNRNIKRKNKSIESVIEDVSSQEDIDALIARLQAKKSQGKMAGTKMAWCTATEEATLLPPEEPLDWDNIQGEDLFTKMMFNKAISDMHEKNHVGEQEDA	MPCNRYGYPGHLEPWTNFGGFEVNFLPEYKVLHDAGYNIIAYDIRNHGRSGLGSGGVNGHGVLEYRDVIGSLRYAKTRSETKKMKTALYSRCLGANATIVGMHKHPKEFTHVKALFALQPVTPRVFVEKAVEAQHIINGVEKFDTAFHRRTGYHLADVWPMEYAKAVTVPTLVAQVRNDFLTKPSNVQEIYDTISATDKKLFWIEGTDQRFQGYNYFGKNPEVMLDWFNSHI
		>unique/2306/3/Org3_Gene1332	>unique/2839/4/Org4_Gene2779
		MSSPPGQALQREQLDLFRALPGDMAPRDSQDLMAFPFFSLAKSRRTAPIDFRAGGITIRVEGTQEHGIATIWDADLLIWAASQIVEARDAGLRPSRWIRATPYEILRFIGRGTSLNDYLRLKAALDRLQSTTVATSIRETTGRRLHRFSWINEWKELADASGVPLGIELILPDWFYAGVLDAALVLTIDPAYFRLKGGIERWLYRLVRKHGGKQPGGWQFDFRHLHRKSGSAARFSDFAYDLRVLVARQSLPGYVLGIERMPDDGQELLTFRPVLHTARG	MRLLLVEDEEKTSSYIYRALSELGYMVDVAADGIEGLHLAVQYDYDAIILDVMLPGKDGYSVLEGIRFHKQTPVLMLSARGSVDERVKGLRHGADDYLSKPFSLIELVARIQALLRRRVSDGADVTQLHIDDMHVDLLARRVTRAGQRLELTAKEFALLSLLARHQGEILSKMMIAEQVWDMNFDSDANVVEVAVKRLRAKVDTPYTVKLLHTVRGMGYVLENRPEPQADK
		>unique/2355/3/Org3_Gene2794	>unique/2870/4/Org4_Gene2748
		MTDRKPYQRPFLKWAGGKYSLLDELYRHIPEGVRLIEPFVGGGSVFINSDKHATYLLADINTDLINLYQMLAAVPDEVTRLARQMFTLMNNDDGYRAIRDEFNAQLLDAPARAATFLYLNRHCFNGLIRYNHNNQFNVSWGKYRAPYFPEVELNAFSSMAHNCVFMNAGFRRTLALAGKGDVVYCDPPYEPMPGTSGFTAYAAGGFNWDDQEALASSCVAAHQRGARVVISNSTAPKVISLYEQHGFTLHHVSARRSISSKGSTRETAKDLVAIL	MFTVSPSIAPEVYGIAPGFRALSIYVQAAPVLNPNVGETALKVACEAVLAGTPEWAESHLAAWAEAFQTFGAKPKRTPCSADALRKRVLRDGDMPALDPVVDLYNAVSLRYAVPVGGENIAAYQGSPRLIVAKGTEPFDTVKDGKPAVEYPPQGEVIWCDDAGITCRRWNWRQGIRTRLGVDAQQMWFILESLPQMPLAKLYEAGKMLTDGLEKMMPGLQFDVALIEA
		>unique/2438/3/Org3_Gene4065	>unique/2872/4/Org4_Gene2571
		MHELEVLLSRLKMEHLSYHVESLLEQAAKKELNYREFLCMALQQEWNGRHQRGMESRLKQARLPWVKTLEQFDFTFQPGIDRKVVRELAGLAFVERSENVILLGPPGVGKTHLAIALGVKAVDAGHRVLFMPLDRLIATLMKAKQENRLERQLQQLSYARVLILDEIGYLPMNREEASLFFRLLNRRYEKASIILTSNKGFADWGEMFGDHVLATAILDRLLHHSTTLNIKGESYRLKEKRKAGVLTKNTTPISDDEMVKSGQHQ	MAGQLDEAAKQILGTLLADFTDRGLTAKDLKDRYEGPQIVAVATAVCNIDDITQVDFDVAFSELEKGNLIRTGPMESYKNRPGDSMYIIASFSKREYVYLTEEGYKAARRTPNRPQRVNRVVNHVHISGGQFSNLQLAAGEQIQQTMSVTTGTDSEIIAQLISILESQGVQIGDEQRNDIESAVSEANDGNAGSAKKLLMKACGSAWENIQQIAWPIIGELVKKSVGL
		>unique/2456/3/Org3_Gene3507	>unique/2896/4/Org4_Gene2789
		MIFLSYNHMDKEVVTPIANKLASIFLSENIFFDGWSIQPGDGIIDKMNEGLTSAKYFFFFVSKTSIQSKMVDLEWQNALLKATKGELKLIPVKLDDCLMPSILLQTLYIDLFGKGFEIALRQIIDVINQSNKNTDVSQQTYENVRAFVSRNENKLSVDIKAITYMEPQARFAILTMNKNDEFGWWEKNAPMVQGVYKDNVVQLPNGEMANAIFFERQRPLSPGFPYSLEIMEKEGKEFILIEVMHATSDDFYRTIPKVLSTESK	MTKILHIDASARPGLGGIDLHGSYSRRLTHDFVKYWLSRQPGAAVRYRDVGLQPPDHINHSWIEAGFGSGLEPVEVDRVLEKSNELVDELLWADVLVLGVPMYNFGMPSSLKAWIDNIVRLGRTLFYTPDVPGHPFTGAFSERSLPVVLLSSRGDHGMDPGGEYAHMNHLDPAIKTALGFIGINEIHCIAVEHQSEGGDALSHSLQSALSRTADLANTLLATRGV
		>unique/2542/3/Org3_Gene2804	>unique/2914/4/Org4_Gene190
		MGWISTYTGWHFNYADPNLDSICLLDIAHSLSQINRFCGHTNWPYSVAQHSVGASYIVPQEFALEALMHDAHEAYVNDMMSPLKHMLPDYKSIETRIEQLVRLKFDLPLKTSPEVKHADLVMLATEKEALLHANSGEWPILNGIEPSNRIIVPMSPVEAKQQFIHRFHDLTAGQYLTVDYEGEPVYLGPPEDDALIIENAMHSLMLRNIQQGLKLPGRKPLSAEVLDHVNHLHADNEHLRSVVYELEAQLKAGVQRG	MKYPGGKGKCFQRLINLMPQHHTYIETHLGGGAVMRNKLPADRNIGIDLDSNVIQRWHEEENGVCELFHTNATSFLRNYTFKGGELIYADPPYVHGTRRNNKIYRHEYTDADHHELLELLVTLPCYIMISGYASTLYEEFLHGWRRETFNAKTHTGVREESVWLNFSPPIKLHDARYMGDTYRERQTVARRRARLYDRIDQMDPTERSELMKWLNSKYGLEAV
		>unique/2564/3/Org3_Gene1334	>unique/2949/4/Org4_Gene2783
		MTDRSAEHWYPTAAYLYVLHLDGPALAWEYLRRNPDYRRDWLRRRRRPDTAQAWGLRLLEDPALDARDAHPAWFPDHDAVVQVYPDDDPPPEAHAFEFWRVPGRKQLIHDGKRLVLVSHWPGCCLRLALAPGLEDGMAYLYATRACATPCARYRTLASELDALAVATVAAPAAAARSRPTTAAVLELHTLQMLDATLAGASLREVAEGLFGADAVAADWHKDSALRARVRRLVRRGDALMRGGYRRLAQLPPPLQ	MRNSPLRLITVRLFIFLAMSVSSLTAIAAPQSQEGKRILVVYFSQPEDVKLEGVDGVSGASVLQKNNERLGSTQYIAQLIQKQTGGDLFRIETVNPYPLQHDPLLQYAEKEQKENARPAMKAKIESLNNYDTVFIGYPIWWYKMPMVLYSFLEQHDLRGKTIIPFTTRGGSRFSDSLSEIARLQPNAKLITQGLTISRNDVTDDETVTDVTNWLDKLPQ
		>unique/2585/3/Org3_Gene2130	>unique/2968/4/Org4_Gene486
		MTKTNHVVTRNIYVSLDTDGNDVNFNEIFSITDPAVALQAFSMSRVFQQALVPVSISGKESLRFDVQKALEIIKNNSEMAVINFTDQTIEQSNSAVQLMVDKVLDILNKVLGVVIGDVPKQKLYNSIESAFTGLDEQKNDAWIFWQHTSAHKTTYQYNILFGVQSKETGLFLYGLPMGMEITVDIEKEKVLFITLKDKESYSVHLQSLSVVEMIKDHTNLKTALENKSTHQASYQKANDLFEEYKNKAPTRI	MNQHSDAERQAGILILSQLKMFNEAVVYFEQHLSPAFWKSFDQCIERFMKDNNWAGKANYEHQDYCWLAHPGWVIEGVNCKYWFENSSTVSDENDYVLAVLTNTGTEQGQFGFEFKFNTGHFGGAKKAASYASNIQQSSRKQLQELGFLDQGKGNYFLPVTIEPHLLTECWKDYGEFPVEHEVFSPLRAALETLLHSTEVMDAIFSSERQTSTDELVG
		>unique/2630/3/Org3_Gene2982	>unique/3011/4/Org4_Gene507
		MDSDDNKSNKFSGATAAFGALGNFGKKVLSKKDSVQGEGSEITESKVMQVLDWAYDKACNGVVGLDSAQELAEPYLNGEGELVDKVNALIRWQNTKAGTSGFITGLGGIITLPVAIPANISSVIFIQVRMIAAIAHMGGYDLKDDRVKTLVYTCLTGNAAKDIVKNIGITISTKMTNTLIKNISGETIKAINKAVGFRLITKFGQKGAINLGKAIPLVGGVVGATFDSVSTNTIGNISRNIFIEEKIPE	MPIPERPKIYHILHIDRLHSIIAEGLLSDEQISVRHGAGTMIGMSSIKQRRLHELTLTNHPNLYVGQCVPFYFCPRSVMLYLIYRSNHPELAYRGGQEPILHLEADLYATMAWAEQHHQRWAFTLSNAGSLYFEDRCQQSQLGELNWDAIQSNQWSGGNGTKEAKQAEFLIERCFPWHLIERIGVHSPLIYQQVANIIPLGGHRPPVEVKREWYY
		>unique/2632/3/Org3_Gene1172	>unique/3042/4/Org4_Gene120
		MAKLFFSVKLWGATSSIAVMKMLAEQAEVNISRALSDADKPGGVEVGEFPDERYHEDGSVTTFQRTYYSCGSCVGYDQDEVRSTYKHLIAQLTRRSTFLTIFGLFEHHMVGCLELMDDLSCKTIDKKHKTVEDCHNRLKGDFGGKNIKDVDHLAVIRNIMAHSDGVADDYKILSCKKTKKTDAEKRLLRAIPRAMADNAGVSITVFNDVLMDDRFLMYAINEFERYINELSIAVRTYQTQMSSAHLKSI	MSQYLFKNIPGEYFDKYRPVRDAFSNLENLLVTAEIVNTCHSSWNRESSDFDLLITTGTHKRILIRKPDGFFTMNLPFQVIEFEENICFNYDAYGLAVNAEFISRCRNVITTCENGFFSHEAIAVDLCDNFDRDMQLAINYSDAISALLLLDHGYFRFDDDPGNVNGRVHPRYHFDFFCNNSTNVKIGSNIRIGDSFFLDLFDVSKDRPYLA
		>unique/2683/3/Org3_Gene1306	>unique/3085/4/Org4_Gene485
		MKTRVLSVSLAAALAGSLMLAQPATALTFVDPVNLVQNTLTAIRTLEQINNQINQLQNEAQMLMNQARNLANLDFNIVNRLRSTLAKTERLIAEAQGLAYDVQNMDREFARLYPEQYAATVSGDQMLRDARERWKNTLDGLHTSMRMQAQVSQNLVQDESALADLVSQSQSATGALQAAQATNQLLALQAKQSIQAQQLQITQDRAASLELARQAAATERAREVRRRFLGTGTRYTPQSVNFYNN	MNIYHSEYGGHVTSYKNKIIGVINNAVKEYPRTLALRMDLHDPVILDNGDTISCFANTDSGAISRFTNSLKAKLTADEQRKRKEGKRVHPNTLRYAWVREFTQNGKRHFHVFLFLNKDAYYHLGDFNMDDDTLRTMITSAWCSALTLTHEEGLHLVQYPANGKYILNRDDILNDIYPGDLLNRIDYLTKVKSKVFGDGDRNFGCSLS
		>unique/2701/3/Org3_Gene2766	>unique/3103/4/Org4_Gene2786
		MATPSPLSPVKGDKTTLWVYSGTGDPYANPLSDVDWTRLAQIKELTPGELSAESFDDNYVDDEDSDWETTGQGVKSAGQASFTLAWKPGETGQKSLLSWFDGGEVRAYKIKFPNGTVDVFKGWVSNLGKTVARGEVITRTVQITNVGRPSLAEDTVAVVSVTGATADPTSVNVAVGATATVQLTISPDGASDKSFIVTSSDESVATVTANGLVLTIAGVVDGSANIVVVTSDGKKVVIIPVTVA	MFVYAAVLALVVGSIPFIVMVVKDRTYVPSPVYAPAGESNRAVAVVYYSRSGHSEAVAREIAQTFNAPIACIYAEYTLDMAGQRNAVSDASKEILPKIVVESIGLAPVKRIFLVAPTWMFRPATPLWAYVEQTDLTGKQVVLVTTGNSRFKQEETDAFAARVAAHGGHLVHHIFLRRGRIYWQKSREELIEDVRDQIREYQHATSL
		>unique/2807/3/Org3_Gene1303	>unique/3121/4/Org4_Gene108
		MRFKRPQVRYADTPQPATPYQSAAQVWDDRIGSARVQAKNWRFMAFGCLTLALLMAGGLVWRSAQSIVTPYVIEVDQSGQVRAVGEAATPYRPADAQIAHHLARFVTLVRSLSIDPIVVRQNWLDAYDYTTDKGAAVLNDYASKNDPFARIGKESVTVQITSVVRASDTSFNVRWTEQRFVNGSPAGTERWNAVLSTVLQTPRTEQRLRKNPLGIYVNGLSWSRELDSSEGAKP	MDFLNRIKKEMSEGIVKAILENYGYRVIDTGIEKVIREISFLPKEAYVELEFPQAMRKLPDYVVMNKNQDKKLLIDVKYRSMWDGSLLLDKEVKEQVELFRKIILVVINGQPPAPPVGRTSHNPIAYIRCVVLAKRNDCLYVKKRQVHADDDWIEINEKNTRNFNWFATHTLGEVFPLITDEYNNEIIKLSVEALSGIINDKKS
		>unique/2886/3/Org3_Gene2969	>unique/3125/4/Org4_Gene117
		MTNIKIITLFNTNEKIPFLTCVVKDVEENEHGIKLILENGNNIYVKDYDSFFLSESANDCDKERMVNVYGRLISELSQVSEETIRSLMSETETYNRQHPNTPVSVLDDYYYCGRVKANAPDESTLMNALGLQDLREAITEDIFLSELEASGDIMLHTNMGYPVAEYKGTDIRIAIEPISFAHMLTNGYVVMFRNGEFEHELEGDLYEALSQAVDRLKIAVVLCENR	MKQPWELNSVLTADRLKQLASLIRDVRDDVIDRHDDDIGDTARGTGMRAYECSRSRIIRAVKDSKNWPWLGIVKPDGRFTFSIQSVPVRLYRGKPGCPEERRLIPSIEALRQMSWLEPEVGDSAAVLWFFAIELDEMRYVERVTFVGFLEGQQISCWEIPLDGRVPAFGPAMSELPQPIETKKALVSVKKKDKKAENDDEDNGQ
		>unique/2934/3/Org3_Gene3515	>unique/3127/4/Org4_Gene2812
		MSITTTKRHSEEVNVGLSDRLKTEITAPKFDLFGETYTFVETFSGTVIDSDPNNGQIWVKTAAGDEKQISDYSIPFRSSHTIHKYEFRQYSEDGSYDAYKDALIVNKNTGEHEVNLNRKAVVIPAFLTMLFHNASTASYYRAMPVSKLFSVIFILLCATALISFLTLPWGFKDGYMWSDHKYMWFTYLFSRIGSFICIKLMKRRSQRFENELRNLIESVKR	MSLSMFAAFWAVSVLFVITPGADWAYAISAGIRGRRVVPAVAGMLSGHLVVTLIVAAGGGSVIAGAPGVLTLMTVAGAGYLLWLSLGMLRHPTAPAAEQNDYAGSPLKWALKGFCISGLNPKVFLLFLALLPQFIDVHAAWPLPLQMIALGLVHVISCGVVYLLVGYGSGTVLRTRPRAAQNVSRISGSLMIIIAALLLAEQFL
		>unique/2958/3/Org3_Gene1322	>unique/3128/4/Org4_Gene2085
		MSPENESTAYTLMTIELDDKLAGALALAVSQHPRANLQQLARAAGTSKGTLYRICTTREGVIDLLMQRAERHMREALEKADLVQPPFAQALHRLTDHLMTGREFYLFWNAAMWVNLGDAKDHDVKGYAPSFFSDALEDFFLRGQKAGVFRIDMPARWLAKSYDFLLYAAIESAQRGEIATLGMSGIVDKMFLHGASAEPASANDGVATLSMSSQAERQI	MIPLQLAPEPDDFDKNVREKGAIFLKVTPNPSSKDFSGKDFWKKAAHSLHSSYKAICAYSCISLPTAPGAVDHFLPKSKYPKLAYEWSNYRLCLDKINQYKGSADDICDPFTIQPGWFVLDFPSCLVKAGENLAPDIAKKIESTIKILKLNADEGLVDNRLGIIMDLIDGHVDMHFIEKRYPFIALEIKRQGIEADVKNIFKKF
		>unique/2959/3/Org3_Gene3505	>unique/3144/4/Org4_Gene2088
		MIVDSFTRAFYNIKFDSLIESFSFLIEGVRKEENYLRENYQNELECVGEEHRDAYENFLEDKHYNLSTEYPNLLWSSYYLLSYSMFENFINEICNEASKKIDTDIHLKDLNGQGLVRARNFLLKVIHIDSFLTNENWENIKFMGELRNIIAHTAGRLDYNNENHKKLSEKIKRRDDITLINEYDKGADVLLNKGFLISAIKLFKSSVNELGMKKIKIKD	MSNKINISCIVKAHFNTLKDISKKGISKLDITTFIILPISLSLFSAYKNFNLNKDLDSLLVNFGAIFTALLLSVIVLIYDQENRTIEKVRNNADSVGGVSQNKLLLLKELYHNISYAILCSLALVVLTFIHSTLPPVTPEIIDNSRVFIDYKIRGFSINFSFTFTWATTIISPLIIFVTANIVLTIVMIVKRLYLILINNTN
		>unique/3041/3/Org3_Gene1330	>unique/3150/4/Org4_Gene192
		MILALLNQKGGVGKTTLATHIAGELAMRGQHVVLLDADPQGSSLDWTQRRSQQGLPRLFSAVGLARETLHQEAPELARRADHVIIDGPPRIAALARSALLAAERVLIPVQPSPYDLWASSEMVSLIREAQVFRPALRAAFVINRRVSTTIIGREARQSLAEQPLPALRSEVHQRIVFADSVAAGRLARETAPYSAAAREITALVDELLRWPT	MKTALLLSGGMDSVTIAWWKRPDVAITLDYGQKAAEAEIGAAKAICQSLNIEHHIVRVDCSALGSGDMAGTAADANAPSSDWWPYRNQMLISLAAMKAITLGITHLWIGTVKSDGTHLDGTPDFIRKISDLMSYQEGSITIEAPAIHLSTTELIRISGISPGTLAWAHSCHKANIPCGCCRGCNKYFEVMDDVGYDLDRSR
		>unique/3061/3/Org3_Gene2938	>unique/3169/4/Org4_Gene2582
		MQLDDNITIAQLKIIALADKNTQHFITQLLCSSYDEFLCLLYKDMTECIEFMEEDPRVRQNDGEDRLTTDVIHHFRAKGYQASHDEMIGGHSDVVIRHRDYMWLGEAKIHSGYDYLMQGFNQLCTRYSSGTNNNCNGGMLIYIKNNNAAAVISEWSNRLSDAGLNGYSFSECENRQGLSFYSQHTHARSGLPYKVRHMGIVLGFDPQDKK	MKGNEIAEKTLLDIDDFISDYANRRTNSNLHELLSIWDSMTREDRVSMALRIDAKDMAQNLDSQKGTVGGTMITTVLLMRLLGLNNTASRLEFLTHSAIMHAHLRDEIENIRVKGALSQRNQKNASGIKKSEYEQVMNIMRATWNEYPNTTKNAMLKKVYAHFNGAVSEQSLARWIKSEGLSPKEKVRPCPPFKLVIPS
		>unique/3071/3/Org3_Gene1175	>unique/3175/4/Org4_Gene2749
		MTEADLDELADRIVKMLTTTDFYEGMGNGVSELGKNFGYLAYGFIDTDSRSSRSREKERVIKAIHRGIVSRDKIIEAVTRIFDIFNRNVSEAKKETIYNKIAGGLVGSFIISQVVMRASKKIGNMKKMFTGIVYYGLMAGGMMDRSIYRSRSLKEQNPEVYSELRKDDLDLLFFLFEEQVEPLTEAIKMKRTYGIGMFNKLIDKVESRI	MTKKVNLMTGADVSTVNEAVSHRIKQYRKQKKLSLDELSRRANVSKGMLVEIEGCKANPSIALLCRLAAAMGVSIADFVDVSIKPDVHIIADTEIPELWRGEKGGNARLLAGSGGPDMTELWMWEMQPGEKFSSPGHPSGTLELLYVQSGTLTLGVKESLFQVISGYSATARTDVPHFYENQGENILKFIMTVNEKAS
		>unique/3081/3/Org3_Gene2965	>unique/3179/4/Org4_Gene2805
		MNFNDLNFSFGLLGTIFSVPMCVFLFNVYHTMTKFRIENIEKLKNIIHTPITDNHFIEAIFRSIYKTRYVSAEEIKILLNQKNPTRLCYRYAQINKWWKVTELFFIDGKLEFRYSSPFRTKNMRKWWAWGLSILSLSTCLIAGYFLAALTYNILSAKILSNEEFILYTAYAIVFLLIYSYSFLLATSILLVEFRIKWIYEIISAREIQ	MLMSLFWLPETLPVEKRSQASITRAFQNYYDLLTNANYMRFTLCLTFYYVAAYAFITGSPFVYITYFGVDPQHYGWLFAVNIVGLMAVSMVNRRLVHRYPLEALLRNAVFIAAIAAIVLAVTTSLGIGGITVIIGAVFVFFSMNGIIAATSTACALDAVPNVAGSASALMGHYNTAAASFLHCFSHCSVTARPGRWAG
		>unique/3122/3/Org3_Gene3522	>unique/3192/4/Org4_Gene2790
		MKIVSKSFLIGLATAIGAVSALYTIYFGYFPNAPDMQRKDDIIGTWRSFDSYSYSYSYSYSYSYAAQGIIVSSKLKTSYFSNGKYNVSGEISYTSDKTNNANLYVSYLINGAGEWQINDKELVISLNNLKSNPDKIIYNGEKIDLDNLSLLEKLTNKKFPAVEDMLAKGASQSYRIIIDNQNYKKFDVINPFGNNFNMEMYREK	MKNVLIINAHQFYEGISSGSLNKTLISVIQEAMEKRGYTVKLTHIDQGYDINEEVEKHLWADIIITQSPVYWFSTPWIYKKYVDEVFTAGLMQQCFLVDDGRTRQDPSRQYGSGGKMQGKQYMLSLTWNAPKEAFDDKEQILFSGKSVDDVFAYNTVNYKFCGVEPVPSFSCFDVMKAPEIEKDIERLKEHLAYVFS
		>unique/3142/3/Org3_Gene3524	>unique/3194/4/Org4_Gene85
		MSTIETLRELSEVWSLFGDMPDDMTLGVDLAALYLGISVKTLARYRQNGDGPPYIQYQAEGSRVRNQRVNYLLGDLRVWRDSHKVRSTMHAAQIRGLTFTSLSDFTEPQPFWQMITNGGSKNKIISHALTTPDDIFRQLLEEPNKKVIWTSIEEALFMDWINVGERKKWNDLFNEVLNYLIKSSNAALEKQTIETALNLKGM	GLIAIPRIGHEVIVSFLEGDPDQPIVTGRTFHATNPSPYPLPANKTRTSLRTSTHKGAGFNELRFEDQAGQEEVFIHAQKDMNTVVLNNRSTSVNVDHNENIGRDQTVVVQQNQTVSVIADQITEVQGEQTVVVKKNRSTVVEDNETLRVTNNIFIHAEDGSIQIGTGAGYISIKHSGDIEIVGNNLTLNGTRIDLN
		>unique/3143/3/Org3_Gene3511	>unique/3211/4/Org4_Gene2804
		MKSLSEKGKKNNLIQDIVIFILTTILIPILTSLIIIFDSKKPNEDLSLFYNVILNTNNSFLILLIFLFLTLSSSIYTTFRYSCKHNEIKEMNEFILYVSVLYSAYMIFLTSSSIQCNDVNKQLHETPEIKNIVSQIIFLTCSFNKVFIIIVDIFKHYESETTSSNKIKDKIENYNMIKKIRNEAPLIALGIAIYYILFRKKL	MLNQQARTQSATANKTGLSFLLILSALMAVTSLSTDIYLPAMPVMAKDLQGNAELTITGFLIGFCIAQLIWGPISDRYGRRLPLFIGLGLFIIGSVGCALSTDIVQIVFWRVFQALGACTGPMLARAMIRDLFSRTRAAQMLSTLMIIMALAPIAGPLIGGQMIKVTSCHFLAAGDYRNINADVFILVTGDITC
		>unique/3171/3/Org3_Gene1327	>unique/3219/4/Org4_Gene2808
		MTAPTTTANAPAVPPRPRSRLRARIVLATLTAIGFAALAWAAFVSPLPRLTYNPSDSVAVGWYRIDPFDPRTASLPRSLSVDSIVLLPLPATAAALAAQRGYLQTRVPLLKRVGAVAPQHVCIVAGQIRIDGVPSAAVLPADRLGRALPSLQLCRRLEPGELFLLSVTNPASFDSRYFGPVSASTVIGVAHPVWLETRP	MEHDPNRRMLITALAGLTLANVSLASASTGNANVQSKSHVLVAYFSRSGNTRVIAGVIHRSLNTDLFGIEPATPYPEDYFQTVEQAKNERERGVKPALKNSVADISRYEAVYLGFPIWATSVPPVVQTFLSSHNLAGKLLIPFITHGGYGKGDSDDILASLAPTARREKPLVIECDQERRTTETVTSWLETIRS
		>unique/3236/3/Org3_Gene3501	>unique/3244/4/Org4_Gene1454
		MRKIEISQKTFDRLAKHATGFDTPENVINRLLDKQETEFSQRPELTFKPEDEELFKQELIRTKYATVELYKADGSKEEGEWNARSISELSSIRSNLWSGYLRNWKEKGIVRAVFTVKENKNEIGIKKSAVYKNFKINQLDTGTITVYDNDKIVDTVIPVLRAIAQEIGVSPVNSNGNDRNTRQLGQLIIERLS	MFLSCLCGSEHKVIQRALSIVFLSCLCGSEPSACIALQTCDFLSCLCGSERLANTARNATAFLSCLCGSERMTGSMLFPFAFLSCLCGSEQVVECAAALPLFLSCLCGSELQRRAWVIRQRFLSCLCGSERNIPTRGMNRRFLSCLCGSEQYEKCRTIAHHFLSCLCGSEPVFKVDEIRVAFLSCLCGSEQS
		>unique/3269/3/Org3_Gene2956	>unique/3281/4/Org4_Gene500
		MEEDVLKKKRTKWNDAVNDLNHSGLLSCVKRPNLSQLGKIENIRLKDLVDQVFHDGYQPRRMTFLNKDRFFVAQDFSTGINLYSVPKETKVSYSYRMQHQDGRTYPIPYVGYKYDLLLLYKSSLDGNISPSSLGITEDFFRAMLDTAKEVCDKHSNLYRIVNPIKEEELQDYNDTEYNMQVKPNIRKNRP	MFTYLPGKRGWLIIGLLTTFSAHSATEFPTQVNWFSLKALGWTNTDGISDDELGRRIYKGRAIFNYPWTEQFFVRDGTGPLFLANKKAKTLSLVKVNTRSQSPGDLEVTYRGNKTSNCTYEITDKKTYFNANFADGKPEQPTLLLSIPEKCIDQKKMAEIQAQKREQEQKLGKWLVDGVNKEHYRRYGY
		>unique/3328/3/Org3_Gene2768	>unique/3400/4/Org4_Gene187
		MTVKGLQQAIDNLNSISKTAVPKATAQAVNRVAGRAISRSSAKVAKETRVPRRLVRQRARLKKATTNRPVATVKINRGNLPAIKLGVARMLISRKKGNINGMGSVLKIGRFTFRNAFIQQLANGRWHVLQRTSKSRYPIDVVKIPMTAPLTTAYREETTSLMESDMPKELSYALKNQLRLIIKR	MLNKVWFTYKARIQAHHRLEWMDTHSQFLLVWYAILGAVLAVVAIRYPMLLGKNTDIFGAVLSIALLGVSLSVANRDFRGRALNMRKNYLALQHLYNVISTRDRASLEDIIKYNELLSDVENHREMDDKTFRVRNTSQLTSRKPVKKEYFQVYFYAVFRHIILFVFYMAPIIVAWCLYE
		>unique/3364/3/Org3_Gene861	>unique/3422/4/Org4_Gene850
		MIRKIVIVIMVVLLPTLIGLGFYFGRTIPFSAQWSLFEALRTTASIIFAVVGAWLAIIYPERLRLTFNVGTDQKKSSSSMVNMGKLLHPAIHSTMILCIVLLVGVIAPLIKQFPILLPYKLELRGASYSLLMILTFWQIWTVILTLVPADIIKSKSDQEIAKHNGRADFFSQTQQLDPKKDK	MNIRSLLKVIALSQLLVLTPSHASSNAIQTLMSVGNDYSSDKVKQAEDIMSQLAIKNESLISNLNLSEKQLNSVVYVRLDSWRQYSTLKEFLAVFYELSIMKSIKVISEGDYLAFKIKFSGRPAGGYVLYQSEGEYFLKGVVANDGIVVSQSEGDDQFIFSAYYSIANTVFQANGLN
		>unique/3376/3/Org3_Gene1328	>unique/3465/4/Org4_Gene2745
		MTASASPAAGAATAAPLLHPAVLAGQAGNVPLTRVSLAYLEHRFKLYLRFGEPARTLRLDDWRRCAVFLPGAMFCRIRWQANDYGTIRWQLMVMQACTPLDAAQRIPGVQPGARLLLHAEGDANVRAVLERIDGIEALGIAAIDVSPAYWRTLGNRLAARLALPEYTAERHTAWLAGKVLP	MGPRTGGGAGVMLGDTLLIFLAWAGIAALIKTSPHIFIIVRYLGALFLLWLGIKILWTTMREPLQGSADKVIKIENYCLKAFLLSITNPKSILFHVSFFIQFIDPAATNTTFAFSFLGAVLQIISLSWLSILLLTGAALARWFRGHKRVVKLANSLTGLLFISFAARLAATQS
		>unique/3388/3/Org3_Gene2973	>unique/3482/4/Org4_Gene2402
		MCIESYVEDMQIVGNVLAGVSSSASQFSNTQPSKRDVLACKNMPVGKIKSTPVSLTPFLMNAAVERIKHLTAKHVRLVHQISNYSAEQVRDFFGENNYQDVKNLYLSIRGLEGYIATLVRITSGTSANRTLKHLDNVITEYRIAVSDLLMILDQSFIESIVVPSQTEFVDESLFENFSFH	MSLLTYTLLAKNHNKKDFNCGVPELNTYLQKYAGQDSRERFTKCYVAVDENNTVAGFYTLSSSAIDISGLPETMTKKLPRYPSVPAALLGRLAVDSEFAGKGIGGSLLVDAILNVSRSTTGIWALHVDAKDQAAKNFYLKYGFVAFQRKPNSLYLPITNTLLKELASFELV
		>unique/3401/3/Org3_Gene2932	>unique/3501/4/Org4_Gene110
		MLLKNRKYRKGFSLLELLLVLGIVAGLVVSAFIVYPKVQAAQRVEMESKNIAAIQAGVKALYTSAPDYNGLNNTVALNASIFPDSMLSGEGDERTVVNSFKGDVELTVGLTSPGGIPDSTFSITYYGVPSAECIRLIYAVRNNFYSVLINRVAVPQDDYEFSSRRCSSTTSNRITFTSL	MSFLDLMDSAVESPQTALHNLLMKMTNSVKTLHVYYEGKCDNKLYYGMLKRLLNDAVNIRTVICGNKKKVFSFKTELSDRNDDNNKLIFFVDKDIDDYFDDHNYIITKDMHESKYYSIENYVSCEQVFISICRECFDMKDLENSNNKFYIEILTKYNEVQEFFFSRIKK
		>unique/3406/3/Org3_Gene3628	>unique/3511/4/Org4_Gene2750
		MTSPEIYISVDIETTGPIPGEYDLISIGACVVGKPEDNFSCLVKPQGGLVEDEALAVTGLNIDDLNEKGKNIIVAIELFNNWLERDEFKNKKIVFVGFNAAFDWSFINYAFIKHFGRNPFGFTALDIKSYYMGKFGTFWQETKSSKIDVRLKTKNMATHDALQDAIYQSEIFSMISKK	MPKSSSLLVTLMELKKYQEIAFYDLLLSSECQSLPEVVHSGSYWLNHIHIVDKIFRAHLCGKRHSFISTVSDDIPRLQLLRQEAINSNDWLIDYAGSLNADTASERIQFAFTDGVPGDMTREEILLHLLTHASYHLSTCIPSLEKNGLTMPPMLLTTMLSSSRMDSL
		>unique/3441/3/Org3_Gene2979	>unique/3513/4/Org4_Gene2806
		MKKLPGSLEIKLHEKLSKNDILNILAEQMTMLEETFGIQEFKLYSYLECYRENKKQALYHQDHNIVVGAFNLRSQENLENTAKLISKEGNNRVISFEKKLDVDKISTTVDNIQASNPYRYWSNNIQVIPASLVSSIIQNEQNRQQAEKERLDLIEKQYKKEEQIRRFKRFYHPKN	MFNSGLVRRNGMQDSQLDTIQQRLQQASDARAQEAAGGEVLYSGDANLTDEQIAKLLFALYRQGYEYYWKTYAHPNCTFKYTTSSLLDLMNFDVTDHINLINKPLLMTAGTKADTLYMTEDAFAKATGTKNKELFLIEGATHIETYWVPKYVDQAMQKLDVFFDKNI
		>unique/3472/3/Org3_Gene2798	>unique/3623/4/Org4_Gene501
		MDNKNFTAPADITAAMHKLITEFAGGYEAMAQRLSHDGTYNALSNRVRQVGGQMVPFGMAIQMEAISSRTDITQAMCKRAGGAFVKLPDVEQADNEELLVKFNELLASLGAFATAHNEFTADGVLDRDETKRMRAKGYRVQSLVAEIMVVTEMLFGEGDASSVQPLASSASN	MKHIPSLLLAGALLLPLSAQAVPNLWSADSGQGITEYRIANTAGSVFTVNCTGNPDEDNTLQHSVAVSPVNGQGVDSHFSTEVYIVVVIDDQQYGIPSSLGWRNADNAWFAFIEAIGSATQFDVYLNDRHVGAWEPRQKNVQKVLADIASCATTHRE
		>unique/3481/3/Org3_Gene2961	>unique/3634/4/Org4_Gene2398
		MKNEQSFMIKIKYILPFVIFMSLAATNASAAVCSPTVQSSIKQAQYNVMKTDATQLETVAEDFMSNINNSLETIGCTDVWPTGNLGINLPSIDSIIKKTKEAAISKACSLAREKMRDVMGNISESISIDMPVIGNVGGVSVSTGTGSSAGGTVNVNGDSTDVWNSISSVMK	MDTTEEINNTYYYHGHGNLTAGELFNLIFLENFSSRTGLEITAAALILSGQPYLKVSGKLSAATATPGTSVASRVSRALLRDLRFPYGLRPLTPMGKNLATLKMVPTNKIASFVGRYIPWIGYVQLIAIMQWVARDTRRQYNLIARPEDRIEWTYF
		>unique/3488/3/Org3_Gene1164	>unique/3701/4/Org4_Gene21
		MFNYNRKEKTLTVILLLLVLVILTSISYIFKFGWKSTLLFLPLFFGIFITYKSYPNYKKTLKSVVDFILYFSSSITAIAYIIMHEKIFDVLGKSFEINSIMIFLLLYFIAIITVIKCCVSYCDAVEAYRDETNNHISKNERNRVHIPSDEKERIDTKAGLMVFLLYLLLK	VLSLNPTDTDRALVRAGMIQLTRVDVTESFHLESRAQVLAWLRAAEQTAHLSHRGRGQLVKGTTLYFGKNSRRWGLKLYSKGQEIHAKGHGQDAILSLPHAVAWADRTLRAELTIRSMELKRMGRSMVSEWFSDDGLPCDVTRELLRERLQ
		>unique/3499/3/Org3_Gene1345	>unique/3711/4/Org4_Gene2813
		MSQLSFSWFDSSLMIRDAHGRYLPASADDILEAARQIIDQKMQRGAEFTSPAAVKEYLRNKLAGFDHEVFAVLFMDTRHRLIEYREMFHGTIDGASVYTREVVKEALRLNAAAIVVSHNHPSGNPEPSAADRALTQRLKEALRIVDVRVLDHIIIAGNASESFAERGLI	MDRIDCNILAELQQNGRLSLTDLAERVGVSLSSCQRRVRALEQDGVISGYRAHLDPTRFGLNFSAIVFVTLREGDRQAVSAFESAVKEIPQIIQTQRLFGDPDYLLQVMTRDLSAFQVLYDEKLSGMSGVQRLTSTLVMKTVVKDRALPV
		>unique/3510/3/Org3_Gene2931	>unique/3760/4/Org4_Gene2091
		MKNEIKNISIRRLTDTDSSEFINIRLEALKNSPENFGSSFDEEKDYSEVIFLEKIKNNIIIGCFDENELVGIIGISKSHLIKMQHLVSLWGMYVRPKARGLGLSKSLLNFVIAEMKTHCHSIRLSVVATNVAAIRLYESVGFKTWAVDVDALKIGDTYYDEILMRYDM	MIRQDKNKKSSNGNFHFDKKDKDVETKKITSLRTHCISVRLNEKELYILNSQRKIYSKGEWLRMAFLHKLPFIIPEINIEAWRALSDISQKLNRIAAHIDGKSKESQLTHTELFAVKRQLEELRQNLLSADIWSKPDEGYAEDKKG
		>unique/3516/3/Org3_Gene3506	>unique/3800/4/Org4_Gene109
		MLTTPKKINSFVKRFGDNLCNANESDFCFYKFKRIDEFQPLAGECFYNVARMIKENGGSYVLGWMIWEDETHIEAEAHCLYKNENGKVMDITPRVDEERVILFLKDSNVHPKLSYVDGDIYKMTHKRWPMFDKMEGFRPYSEITFDFNKSEIEVIDLKEYHDSFLFK	MIYSFIARKYVNKPVLSNMKFNDLFYFDGKCNIDYKIKGNYNTLLEYFIEKTKCDITGYLDKYDDCLELLSKTDPRCYIRGKYHMEMFCSFLLSLQQAIGDKLPYKQKFQINDESLFLFAGPRIAIPDSIVDFISDALPDFID
		>unique/3522/3/Org3_Gene3526	>unique/3821/4/Org4_Gene2094
		MSKVIDVDIIGDFELELTYEDGMVCKVNLYKYKESPSFNDSKLFVKFGLLPNGDLQWLPDINISSDSLRKMGKDKKHNEKTAKHNFADIISMAFYDAIIENRPEIIQAALKSAVDKYGTSTIAKNAGPKSRTSIYKSLNENTNVSMLTVVNLAHTVMRLEEKEDTAH	MYKNKINPEFTLEEQLIIIIDKYISKRYQPGDKSFSYQLYLIFVGYHLKYFYPKRIYSKSNRNIDNIMAMFSSVYKSLTSNLLQRLNNKEGVLRELNSLVNYIDNSQEKAEEIYATVRAQYEMKVIEKELTHELRVRTVRL
		>unique/3543/3/Org3_Gene2801	>unique/3887/4/Org4_Gene121
		MSRDDLIFDMNYSHRLEDMFGTMTGRIDKFISLLLFVLGGTVFSPYANIFVFGLGVSVLSAIQLFYQFGKQSGISDDQAKKYLLLMSEASALTESELLKKFNEIQSVDSKPWGLLKNAAYKRACLQLGLQDITPNLTRVESVVAWLAGDLPKSNGSSLHDKSHNS	MQSENGFMKVKNKNYRHLLRIEARFKPKLTLKDKKAKALLLKEISSMENPFLRLIIYSNQMQENLIKNNYLQYKLKTNNVIVIKKKMKKRSKLSRHSLAVIEGSEIDLIDLGKVWENWKSCIRRLENLSQNTEAY
		>unique/3545/3/Org3_Gene2775	>unique/3890/4/Org4_Gene105
		MDKELDAVRLNINQLAAITDLHRQTVATRLKNVPTAPGSNSRLKLYAIRDLLSELMKTGAVAKVDDMTPPDRKAWYQSERERLKFQQEVGELIPASDVIREFSAMAKAVIQVLETLPDILERDCALTPSAVSRVQSIIDDLRDSIAQKVTEADTPEPEGDMPEEV	MDELSKAEAVLKEFIIQMNRWELKYYPLFRNEGMTVHKDTAKKDLDDIYDLFCTKKERKQGRQVSLSCGEPPEYSPDEEILSSELNKNKAIFVTQQYTEAKSKFRYTLNIKEGEWRIDKKERFSSFEDKWIKYNL
		>unique/3555/3/Org3_Gene2919	>unique/3914/4/Org4_Gene2777
		MNRHNNKLMEIPADYVFHENHNILHPVNNTEHWGEVKITSKQFNQLGGKIFLRAGKHIGPHKGFGVRHIWSERGSKLIQWGFPTIHDVPRFVSEIIVHQAGIVCEFSEMGGYHRVVVLRGRKGCAVLAAFDNPNDGGSLIYSVVTAYRNINPNGTLVAQVSVL	MKKCFIGAIAAMSLVFSAMGHAQEIQPRGYMIANYDIKDQAGFQKYMDAAGSLAPKYHGTVTVFNLNATAVEGHPKSVMAIAEFPSLADAQRFYNSPEYTAAKKFRIASTEGSVILTEGFVPPKQSKAIASMV
		>unique/3573/3/Org3_Gene1173	>unique/3925/4/Org4_Gene103
		MANYAYMTIEGKSQGLISEGCSTLESIGNRYQAGHTDEIMILAFNHMMSNDGHAVHNPITLVKPIDKSTPLLAMALNEQEKVKVLLDFYRTTQHAKQEKFFSIQINDGLISDINLVMPNIIDDGAGLILEHISIRYKDVTWTHHKAGTSGYALWEMTKFMN	MQSKQLNWLCFSMSDFGKRLAALRKARQLTQIELANLLDIQPRMLGRWEQGQVKPQFDYIIKLAQFLEVSIDYMLLGDKDTPAPVFDIKNKRLKELCKQVDELKADDQEVICRILDMAITQEKMKQVMKTMR
		>unique/3587/3/Org3_Gene2760	>unique/4017/4/Org4_Gene849
		MTVLDRIYASGGSEVVIPTLEITIGADKYYLTHGYDDITATLETGETVTFTACAISVALPTRNADGTQDLKFAISNVNGIVSTRIRKAIEDKSESYVTYREYIDTYLAEPAKRPWTMKVKGGYWKGVEVQITAGYMNVLDTAWPRYRYTLPNFPGLRHLS	MAKLASELTDKLVGQRIQMRRKELGITAQQLAEYADISQQQLSRYERGTNKINVAHLVNIAIKMNTPIGWFFIDCFDENSTGNNKQTEFVPVKDVDLKNRFEQVWPRLTHEQRRVLIMFLDEYI
		>unique/3604/3/Org3_Gene2972	>unique/4026/4/Org4_Gene4218
		MKVLWNSDSYDKFLLPVFKVKPLWETSLLNDFISYKSSQFGTIPAIFGKDDVYTEPNSIVSSRIYHIHLMTGESDRKGKNKQNWTSNAALVYTKHIKADDVYSLLAIFPTNAHSFARKNEIMKELASYARLCPVTIFCTIRSMISPQKVLQFGSLRFSR	MDRTFYAIHVGDLYGYSGSVKTRVLAVFSSLACFPRHNSVLYCVAAADGGGLAHRATISHRAAPLTLLPQYVLVFRQTGAELDTQVRVKPPLVNDILDQYERHLNFLHLNREAPGNTLTLPDT
		>unique/3605/3/Org3_Gene2927	>unique/4079/4/Org4_Gene1453
		MPGAARLNDIGSGHDCFPEPPIIEGSSDVIINGQPAARQGDAVLLHGCPCPNAPHGVHSRKIAEGSSTVIINGKNAVRIGDGINCGGVIVSGSGNVIIGDTPHRSPVQDCAKQAALTRAPLLALTPMLAVEPVLPNPVYVARVVPMRERKTSHRATSGR	MSGFSRDYAEFLSCLCGSELYGLQTFGGHEFLSCLCGSEQNSVSSFTAWSFLSCLCGSELQTQTDSLQRLFLSCLCGSEQDLTAVYQAFNFLSCLCGSERLSLAAHHALSLSKLPMRQ
		>unique/3606/3/Org3_Gene1470	>unique/4116/4/Org4_Gene195
		MRKIRLDNSDLLAYFNTINELKNHPSMGEYRAGYRKLRDYDAFAYEINKYKSAHTTLRRLDKKRQSLLDSFISELNPISSSAANTAAKTSGSLDKIHERILYRKAIEEKNDAEIIALVIKQRTEAALEFQRSVELSLEQLSSISSDLDAPNKKCKTMAV	MARSCWYLWRNRRNILSPACSVGNSGTVLFVKRRLAKLHYGAPSGKASRKFNPVGYHEHRLPVSKNLLKQGFSPDSLNQKWVDNITYLRTDVGWLYLAVVIGLWSRVVMTDRCHHA
		>unique/3611/3/Org3_Gene1488	>unique/4149/4/Org4_Gene2395
		MSLVDKIIEYREELLKENKEVIPEHYQGINKEKIKNVLNMIDRSSNDMIDAVFALLDERPTWFSKKAVNAGIKFCDGATTAHIGTHIGILQNGAYSKKDREGRDYWLKPLWEIGALEKVMLDKHTLQFVPGHPIAKSPLCAYKISHEFKLILQASNGV	MNINNQSCIPLEVRTAVYRRAVAQAYLDNCRETGIALNCNLTELEIAIALELEGAHVREHGTATGMEIACAMLGDMVQPTLLTDKPRLTVLGHIIMGELCQCATAATPTTTLH
		>unique/3614/3/Org3_Gene1311	>unique/4155/4/Org4_Gene2575
		MSQYRLNLFIQPEHAKRLEELAAKKGVSKSSIVAAALASWLSPDAGDQREAAIAKRLDRLSRQAERMERDQNIQIETLALFIRYFLTVSTPVPEAHQDAARAQGKARFEQFVERLGRHLLRGRSLVRDVVDELHPDPVRMDDAAALAEDHERTGERGL	MISQMTFNALVKRVEALELALTAMQQKGNVPDGMAPLTTLAAEMGLSTSKAEELARNSGVMIVKQGNGHIVHAEKFREAALIIIKGAKRKYGSKYWYHPLIGKFQMLGRPQA
		>unique/3624/3/Org3_Gene3625	>unique/4171/4/Org4_Gene194
		MLAWTWGWEKYDFELHVSKDVSDVFDTHRQHSNKNECGGQLFIDVSFNNGLWLSSATLPHSSDKSSKHWVEFNSDRCESEQNQARRNGLVFAGYWHTHPQVIPMLSHQDKISIERFYLLNKNIIRSPIFIIVGTSLGQDGIKAWAYKNEGYCEAFKR	MSGSGGGGGYSGQYGDDDFEIACEKLTFITQLSSPQAHVVNTLNVGAILGIAQQVQGGQSVTVAIFNGNVAGGIASPKVQRMRVCISNGTTYLAKVLSINGGQVRVQVYAI
		>unique/3639/3/Org3_Gene2950	>unique/4184/4/Org4_Gene2087
		MSGKNPFWNYDSNAAQRNREIVDSYQQANEARLDSQQAQFEASMANDRVNRLQMQLNNTINSHKKVVADYEQRLEGFKLNFYKIALQRNIFKTTLDRLQEQWPDKKEDILDEIQKQRDRCNQPEYREKWWNAVSQNNIGDSVLEFPYAKRELKNKP	MKFKLSVSEKGVYYEEFDFWDNAILKALFEYDRLLELGIIDKNVDEEKFCEIITLLSVSPYVVSSLPNSNFHLDSISSDDIPPVTLERIRLVVSQPISKFIHFGLNLGNN
		>unique/3647/3/Org3_Gene2761	>unique/4188/4/Org4_Gene2397
		MADIYYPHDYLPVPKREEGTGFQSVSPLKRTTMTSGRARQRRAYTSVPTQSDVTWLFKTDGQAQLFEAFYREILKDGEAWFYMKLKTPLGIQPYKCRFLDIYQGPLIVNGRHWQFSATLELWERPILPMGWAEFPDYIVNQSIIDLALNREWPKS	MNQRDIENEVIQYLMERYPIRKHWFKSGIRQVTKDWTLQDDYQFLPEDAHDFLLDVFGHFNIEHSNFDGGNYFEYEYPIWQKKPLSQALKPLTVGMIIESAKAGKWLYD
		>unique/3650/3/Org3_Gene2925	>unique/4196/4/Org4_Gene2776
		MSVNVDALIDSLGRTYQEIFDAGLIPYKTKPTGFSGDPDISLDMVKEGVYLSFNRSDRVLNEITLTFVDDDKKSWIFPNELSLPLKKYMSRDYVHEFFGIPVKTSPPEIILKRQFGWIELYSLEGKYLPTSMQINYTLDEVVKTITFLLTSTVRW	MRHNNDTKTVQEQSLLQSRRQMLKTGLSLAALPIVAAVSSGVMAASASAATTATTTNDATADTASDAFINGLADLMAHSTRTPILRWPNEYGMEFEEIFFPAIDGVTV
		>unique/3663/3/Org3_Gene1316	>unique/4240/4/Org4_Gene2082
		MSKITKTLIMAFAISVAMFGNASAQTRDMASEESNRKLVLEFYERFFNQHDTHKAAEVVADNYRQHNPEVPDGKKPFVEYFTGFFKDNPQSRARVVRSAADGDLVWLHVHSTTSQGDRGQAVIDVFRVKNGKIVEHWDVIQAVPESAANTNTMF	MKVEHPGKSLLCKLEECGLSASELARKIDVPKNRITTIIKGKRAITGDTALRLAHFFQTPPEYWLELQLFFDLNEAKLKSKQLIQFLPKFQRASSNSISKDNTND
		>unique/3673/3/Org3_Gene1489	>unique/4252/4/Org4_Gene2093
		MVKKAKELVHSPHSQLIADSCEYYVPMFLKNYEIIFIDDGDGDRITEEQKEKLEYAGLTLQLNDSMPDVLLWNKKDDTLWVIEAVTSDGEVDIHKVENMKAFARRNDKKDVGFTTTYPTWSKAAERQRKYKNIAHDTYIWIQEDPSKNFYVNG	MKTHSILVIILSTFLLTACNSEPSEKDIANVFKSVVDRSNASMKSLNPSISEKDLIKVDYVKKVNCTEEANNVYNCIVDASISNMKQTKPVKLVKADGVWKEVQ
		>unique/3700/3/Org3_Gene1326	>unique/4253/4/Org4_Gene2744
		MMAADSLHVAVHPIVTSGVSFLLPPPCRRACRAGAFAPHVAQHPAQPSDVQASCLERARPAAIAAFAGALAAHAAAPPGRRCLERQRKAKAEGKTKGRGTGPCRKPVCTWGEHSTQQIRRRAVFGARVALMQACPRASHDRTRQSLQGAQP	MAWLMLTAAGILEVVWAYSMKLSDGFTRPLYTVVTITGMVASFILLATAMRALPLGTAYTIWTGIGAVGSFVAGLYFLGEPATPMRILAAVVIVVGLIMMKMAS
		>unique/3713/3/Org3_Gene1165	>unique/4254/4/Org4_Gene2099
		MSWYNILSLVFSALAIIISIIVVIYTNKNHRIECLKVVLDIETEMNARKLEFDKTSKEIRLLNITSDVNENNKDEKIEILGNYFETTKENYLNSLDRLCYCIDKKYLVDKDWRSEYRNMLNETIDTFPADFGVNSSYRNIKKINEIWQSS	MNIEEFVSEDNHMCNLGDDLFYKIFEPGAIYDLPDNVFNRKIVYWLSQYLVGNLREPLDAIFELNIFDQFYVYETWFSLIKCPVEMKSLSKRIIQYHIGLRTLL
		>unique/3740/3/Org3_Gene3523	>unique/4270/4/Org4_Gene2797
		MYKIKIQFLNENDDIDETEFFQSKNDHDDELFREYRELLFRDVNNNIYRRKIKIPLASLIKENTIVDFVEKDNCVILSFNNEHSKENDIINEPDNHYRKSGNIRLLLSPGENNGRLCDIDLPLEILKDQYKGYIRVSLTTQGDSEGLV	MNDSEHEILKNECLIYDTIPFREKFKMKSEDTLDWYPAQLPPVKIILGEAVLAVGKQGRPINTRTLLEYLQVMQDKQKRRDDKIAMQTAIDVLRDNQRINGRR
		>unique/3761/3/Org3_Gene2968	>unique/4277/4/Org4_Gene2576
		MNNEFFNDIERLFESSNVGYDYLERQFSVNDRKEIAAISASIFIDNRYDVKILNTYAGILSNLGIDDFAYAFTCLYETYEEKKIPFPKEEKIKVVITVLTILKDIEGIDFDEYKRRLLHAISGAYKGDKYLVRDNGHHMPLYGWSS	MANASKFQLLINGHYGVTADMAGDISKMAEEASTTIPISLAAIGNLMFHATENPDYELEDMRSDMLNIGLLMRLLGNFQVAISTTEHNADLALRNAEKEATK
		>unique/3813/3/Org3_Gene2921	>unique/4441/4/Org4_Gene2394
		MRIFFNLRNDWPDNVKKLDSAKYDQNEIPWCGKELFFLHEDGRVYQKYVKMPFIVDVDEFSLFSLVTKDYNSFLIEKITDWPKGVNIRKGFVRAEWGHKSYGACFYVFPDGSNMYAYFDAPLIKEHHRIYNVMPFISYEVLN	MNSLAARLNNHDTYPIPYADYLRLSHAHRVGVMFLDMLDAQQCGMTAAKPNTLPADDMAALVALLTDQIGHVMTHCEAHLFTVRETAQ
		>unique/3860/3/Org3_Gene2765	>unique/4443/4/Org4_Gene2401
		MLKNEKFTFNGETVTLNELSALQRIDFLQYLVVEEKFLPKEGEDEDDNSRAAAITEMNIRSAARVVAMSLWQNDRKGPTVDDLQQDVLETWSPTAIGEADIKIKILSGMIRPSEQEDGIQANKGDENEEDQAASLEKP	MPTTARLEARIPSELHALIKHAAELQGRTMTDFIITATQEAAKRAVEETAILRLAMEDQKQFADSLLSESPASPALLGAMQRRKALGR
		>unique/3862/3/Org3_Gene3518	>unique/4490/4/Org4_Gene571
		MAKHLTKEDIQSIINIIAGWNSNKLGKLTWEALCDYSADVIGKRPTRQSLSCHSDIVAAFSIKKDNIKSGLSNLKRPANLNIAAQHIQNIETKKSILEEQYRELKKMMVLWQYNAYILGVDEHQLNKPLPIIDRERSK	MEIKNLKEAIVQYEILEKRLTQAFNEYEKNLITQEDLILSVYRVEGYPRFSIDNEDMKLDKTIEIKFVQWLYMKRVRENNKRACP
		>unique/3883/3/Org3_Gene2939	>unique/4505/4/Org4_Gene2781
		MLTRAQIIEMIDADFRSNPEVCRACHSVIDYICSSSKDNLRHIAFFNLKKVINTHDDSLVVNVVRYFSGDSLPIIDICFEFIEDDFIEQVSLEDFQKTQLDNKYYHPETGELVKDFESKIFMYFSLSKLGREVECN	MNRIKCILSACVILSISTSAFAAKSVTSDEGLTKIGVVSVRSASTLDDLENKVADKANKAGASAYRIISAHGDNRLHGVAVIYR
		>unique/3892/3/Org3_Gene2949	>unique/4510/4/Org4_Gene2399
		MRLNTTATNHHEFLATTEVFGGSALSYEYEQAEFVISLNEHSVLLFNKNRSAVYGYANIMEINYSLSFNKINNSIITIITDDHIRPEWIISVPSDNKYFSSRQICERWVEIFNENISPFSPEKEIKKTQFYNYQL	MSVQPILANAAVSISDFKKSPNAALKEANGEPVAVLTNGRISGYYVSPETWEALADYQEDIELAKIARSRMKGKRVKVDLDEL
		>unique/3897/3/Org3_Gene2767	>unique/4530/4/Org4_Gene643
		MIKHPLIRNAVLAALKQSITVSPVVWYDGRPAFIGPDELPVVAVYLTDAQPTNQLVDEDQWSATLHIEVFLKATSTDSELDSWMENYIYPALSDIPALADIIETISPEGYDYQRDDEATTWGSADLKYSITYNM	MDAAQACATQDKNVRDVFEQHLCWPEGRVPFMGRVIVSQAVRKAGYRRRHRFSGIISAESLGSRGERRLSRPVSGACYEVA
		>unique/3912/3/Org3_Gene2951	>unique/4540/4/Org4_Gene2774
		MTTSNKSRYIVFAILAPKHLRTGKITDKDIMDEIFIIFDSQNLKVHNAHINDEIAANNECYALNHPAPRYKLNPIPEKIEEMRNIIDITPYLADQISENETTHLDESYKVVIFDFLKGKYIPSAHKIFKQTHP	MGGISITQLLIIAAIIILLFGTKKLSSLGADLGASIKGFKKAMDEENDKATSADESSKLPPSLSNHHVNDHPDEIHKKDK
		>unique/3993/3/Org3_Gene1309	>unique/4573/4/Org4_Gene502
		MTQMHIPASRISVNPASTIARLRRLVGPAHHGLLLAAVMLMTAGTAKASGSSMPWEGPLQSILESIQGPVARIVAVIIIIATGLALAFGDTSGGFRKLIQIVFGLSIAFAASSFFLSFFSFSGGAVV	MPIIAIIVIVVVVIVLSKTGISDSLIGLVIATVAGLLTGSGTAGVASVALTPFLGIPIGLFIGVTVFAKVLRWFSRR
		>unique/3997/3/Org3_Gene2793	>unique/4584/4/Org4_Gene2754
		MKLTLPFPPSVNTYWRSPSSGPLMGRHLVSAKGRAFRAQAIACVLEQLHRKPKAITTLVAVTITFYPPDRRTRDMDNYLKAPLDALTHAGVWADDSQIKRMLLEWGPVTKGGKAEIVISDFQGVTW	MPSDGLQPYVTFSDPAKTQHIHDWFSASNIQVAAPESYVTNMQAAVWFIIIGFANVDINAFESVLEKPHRFLLASS
		>unique/4002/3/Org3_Gene2759	>unique/4621/4/Org4_Gene2581
		MLNIDKYRSVIWQKGGRVYPNLDCFGVINEIRRDLSLLAWPDFAGVTKDENGLDREAKKLMCELSLCVPCTGAGVACYSSGVVTHVAIVVEINGAFHVVECNPGTNVTILPLRRFERRFMKVEYYQ	MVINMQLVTSHLSIERFTRAEAAAYLGVNSQTLANWAHTGKVEIPHHKVGRKVIYMKSDLDCYLASTRRTQTA
		>unique/4008/3/Org3_Gene2955	>unique/4635/4/Org4_Gene2807
		MRINIKEVLTMSMVLSVTVLFAQTAGAQTVSDVAERLTDQLTNISKLAVGVMFVGGLVTGGMSALKFKEHNENPNQTKLSKPITYLLVSAALIGIPTYLGTMANTLNGEGHKSSDATGSTFNQIR	MLMVAIDLNRLSVSAATSQYPPPPQIPSRPRREVSSRELATVGALAATPGVEAQLLSHTRAEKALQQALANN
		>unique/4030/3/Org3_Gene2781	>unique/4653/4/Org4_Gene1925
		MKQWTIAASALVVGMAIGWYVTALRWDVDAAERDTSISTANKQRAETITANVITSLRIINTITQANADAKQQIQNESETRIVHIRQSLSGERCAVSPVPADVVNGLREHADRIRHGSSSTNSH	MTNGVTTLIIKNKTLFFLISTLFLFCDADRIIRSYQKDIGAFYLPPQHSQWSSSLILYATYIRNRVHELC
		>unique/4034/3/Org3_Gene1313	>unique/4675/4/Org4_Gene2090
		MQAQGVLFGQIAAVFGIVIAGVWSATQWTAAALGYQLRLGSPWFDFFGTPVYHPWRLFEWWFFFDAYAPHVFDIGGAIAAAAAWWPWWSPSPCRYGARGKRASSPPTDRHAGPKRMTFARLG	MTYAALPHESSFDFTNRLTQCNSLYHYLSFILLISHMPIIYYIMTLPTDINNTLLTKYYLNYILHYHHN
		>unique/4066/3/Org3_Gene2935	>unique/4695/4/Org4_Gene2578
		MTGRVLLLGVFFLVGCTNFSAKQPYRTQDGEQLLISANMPNGVLKLWINETLIINESFLNQDKSLAGVFSNSYTNVYTGTYKGKKVMARCKRETHTFSAPDHECDVFINGEYAANLFLR	MSNQVELNEVLKNAQKASVIARALHYTWVELQGHEVELMLEMTTEYTDSVTEYLINLSGEDSEGANHE
		>unique/4072/3/Org3_Gene2762	>unique/4787/4/Org4_Gene1430
		MKKLLAVVLSTMMLAGCTVRVADLTVASTKNYNLNSAKFVKGKRVTAEDSYAVILFPTGIPNVKTAADRAIEKDKCAVGLTDVVVTQLNHAFIFGKIGLRVEGTLIIDRSQPGCENAS	MSEAPPIQLRGQRERFFWPRDVLSSSPPENPPDCFLRRYFLQRYFLQYYSVFMPYCEALRMP
		>unique/4093/3/Org3_Gene1323	>unique/4817/4/Org4_Gene2577
		MNSTSMTGIGRLFALACLLEGLTWAGLLIGLFLKYATETTELGVWLFGRLHGVAFLFYVVVSIIAARRLQWPWWVTNIALLAAIPPLVTIPMETWFKRHGFLIGADDRKLQMQSTKG	MSNQPLASLACELAALLLVVEECELDQVTSVNLVSLARRVSDNLAAGMVEQDSAEVRHG
		>unique/4096/3/Org3_Gene2959	>unique/4818/4/Org4_Gene2573
		MELEIRVGDKKLIEPDFKIYTNDNDKTLFFIAMKVDIDAEEKIRQSMNNDEFKIEIQNGIIGLTIIDRIYSFDVRGFLRAYLINHVKDQFSVAFAFLDEDDKIKKENVKAIRMRHK	MPTKKKGQAVHIDADTMNKIEAYQEWCRKNRPEMPVPTKGQIVRNSVHYWYNASLGAWL
		>unique/4106/3/Org3_Gene1467	>unique/4851/4/Org4_Gene3334
		MKEIVLNGFDKTKNHLIANIFQGFCDEIYAIHEEDPETATYILSWGKLSEVIYDVLITREIMKCSIKNDMSGINQEVLKEEILHWHLEHIIELLFENINQDENQDPVYWKLKMTVV	MGIGAIIDALKNTLTKSKRWTQDSLKLEIVENTENIKNRTLDNYFSEANKFYKSNC
		>unique/4114/3/Org3_Gene1336	>unique/4855/4/Org4_Gene2803
		MTLPLVTADERARLLAHGAALAAGQRLDPLPVVRLFTPDAHVTWLLVSLDPADGDTAYGLIDLGIDMPELGMVKLSDLAGIVGPRKLPVRRDRYFQAVRPLSEYVRLAQENGAITD	MRRRFSPEFKRESAQLVLDQNYIVIDAANAMNVGLSTMARWVRQLREERQDESPKA
		>unique/4136/3/Org3_Gene2970	>unique/4886/4/Org4_Gene1010
		MLNRVGVIRKSGNLKSRPKAVLADKGYSSRRIRIYLKIKGIKAVIPFKSNEKASQDGRRPLNTSLYKKRNVVERCFAILKENRRIATRSEKTARNYLSMLKLAAIRLFLKRLLS	MGEKYCVNLSNIFQTTTEHLQQISTYLNTCAHLIPVLVILKEHASSAHTANFT
		>unique/4138/3/Org3_Gene2790	>unique/4899/4/Org4_Gene1
		MRDMYERLDRWGAWAASEQSGVDWQPIAAGFKGLIPHGKKSRTQCCDDEGLMIDGCVARLKKYKPEEYDLVVAHFVLGISLRAIAKKRKCSDGTIRKDMQTAEGFIGGCLAMLV	KAVSNDLTLKRISIVYAARATDEVALLFNNIIRQSVWALTRPYLNDIKSLEE
		>unique/4151/3/Org3_Gene2805	>unique/4907/4/Org4_Gene513
		MAKNSKDAYGAQGKTNVLNFAPENLYMTDDPAHPLPTVEFDEWTQNNGMDWGITELETDPATEADAIRNRYFEAGDLNVSDWNPTPPDGDGWFVVSIHDTEDGPVCIWVRENA	MNNIQTPISLSFDALLASLLENKEQLANELSDNNVFHTESIDSFGSWYEAD
		>unique/4159/3/Org3_Gene2971	>unique/4908/4/Org4_Gene1941
		MNGIFWVLCSGAPWRDLPERYGQWKTIYNRFNRWSKAGVMNSIFNKLLQLLDEKALIDWDVIALDGSNVRTLKAAAGAKKNIPMNTRTMGWVALAAALAPKSIWRQMAQDYR	MCLFHLNRNQFLFKVIKINALCFYLGFILCFYPRYTYGFIHSLAIVIVVKS
		>unique/4160/3/Org3_Gene1305	>unique/4912/4/Org4_Gene2792
		MRCVPVLLAVLLTACGQSSEQHRAKDLAATLAADPVRLKALRAQCATDPQAAGEDSCRAAAEAFRRRFFAGQTGPDEYRTLAELPPIPASFDTPADDPQEGDAPLATTEDTP	MGSMCRNGNCLDNAVTERFFRSLKVEGVNYSRYETRSQCIVDVIDHIDSYL
		>unique/4183/3/Org3_Gene1337	>unique/4925/4/Org4_Gene4298
		MGCHLGFYGETKLVTAKHSLATAIRTVRKARGLSQEAFSDVSSRTYMSTLERDLKSPTLHKLTELCEVMEVHPLTLLTLAYAGDDTHKADELLARVRQEFEAVLKERDAP	MFAFACGVHCRWHDRQDQMGGVYHKAYNGLILFTDNAILVTVFYAFNLFK
		>unique/4204/3/Org3_Gene2770	>unique/4932/4/Org4_Gene3335
		MAKNFIQEGKTIAITNAGTEEIASGELVVVGDLVAVAITDIAVADTGDGFTEGVFQLPKLAADVIAAGKKVYSLDGTIQLDATDAVYAGYAWEAAAAGDTVVSVKLNG	MVNLRAVSSNVNHFLSLNSFFMMLPIRESCASCGEKHSGMGFSVLPVFTG
		>unique/4224/3/Org3_Gene2981	>unique/4939/4/Org4_Gene2213
		MKPLDRDLAKKLIRAVGVEYEYQVSGNPQDAVFDVYFAREKHGIAFQVRHSTHPSAQDGGWLQVHHYEGEPADWGPALHSLRTIGDVVAFCQTLITFSQIKSKRQA	MAAYTVIWFYLSRQVLLFRPAPSELALITEKCFLCEIRPKILTYSTTSW
		>unique/4250/3/Org3_Gene1338	>unique/4948/4/Org4_Gene409
		MANIGTFTAEKDGFTGQLRTLTLNVKVKLVPNDKGENESAPDFRLQAAGHDFGAAWKKTSEAGRDYLSVAIDDPSFPATVYARLIEGENDTHDLIWSRSKPKAA	MTRCLRIGLVSFAAKNTHDISAAANCGLAQRQSHALGGQSEDSPSDTTI
		>unique/4251/3/Org3_Gene1464	>unique/4974/4/Org4_Gene491
		MNSQEMKNIKESSTNIFAAMAKNLYITGIRIYKEQEEYEVLAAIMLDSNRTGSYILHVKEYLEKRFDEHMEEAGKREKLIYVDMDKVMFEMRYIHTQALLFSMS	MYFDSVLHHEHSVVLLQPYQQLMTNLGAKIQQLLLKCHEILFDENAIS
		>unique/4279/3/Org3_Gene1324	>unique/4995/4/Org4_Gene4484
		MHAMIQWKVKPDQVETELELLAAVYEELQQREPGNLDYSTFQLDDKVSFIAFANMPKGLGVLGDLAAFQLYRSTLDDRCEQPPSVTVLHEVGLYTSVPRTVG	MRVAKKLCEFALMELCFTIVGITFLFGFFVVNKRGANHKNLIKHSER
		>unique/4284/3/Org3_Gene2985	>unique/4997/4/Org4_Gene3272
		MVNNIKKNEISTILRKKDNEQSSMINKISVVVSVLCDGPPEVMNTIQERFEIFVAITGYSVEEIMDDENILDELNLFINNELIDYLGLEYSSVITNIGYNN	MGQEPKGIESRKIQDGNVRTKVGRQQGLWVRMTKKEKFSRMSRDANV
		>unique/4290/3/Org3_Gene2764	>unique/5011/4/Org4_Gene1241
		MRLAREFRRPDWRTMMAGMSSTELGEWSEFYRDNYFSDSLLDAHFSNLSYLVISTCCKHDLTPEDFSLFNHSSPDVELDNEQLMSLAESLSGGVRYGPTSG	MRIVLSHFVNLREGDVHQLDTAMLFWLVKFVPDEFVLLLPRYDADR
		>unique/4291/3/Org3_Gene2792	>unique/5063/4/Org4_Gene3164
		MVTKAEMQQSITSLERENSALKTLLSRMERELRGKPLPEDMPPKPIPSMILGLMREYKLPWECFWCDKHRDWFVVLDSCFPHYWEDCECRACMNADPHGGC	MEKILYWSIFVLFLIPKINIISVGNYNAGIRIDDFIIASWILFL
		>unique/4304/3/Org3_Gene1344	>unique/5069/4/Org4_Gene2811
		MPEIKKSDLNYDDYSWTAVPGDDPKKTKEDADRFSRKEGYEVLTLLNSLTGENKADLSVRVRQVCEWMIHEKLPSDIQGRSKVKTWIGKNYSELSPKYPH	MNTLNVREASAMGFMVSGGLSNTISVAKAGIIAPATSYINVTN
		>unique/4327/3/Org3_Gene2986	>unique/5097/4/Org4_Gene4442
		MSKEKISMNKSTELFYELACRSFAASWNLFMEVNGDGDANDYLDDPDFMSPFIIHVIDYIQNNFERFTAQEGNSGDINQVNFEKVAAMLVEYSDNFRK	MLLILSSMVMGHAEHIKITERLFDFYPYCMGIRKIEEQSIFII
		>unique/4366/3/Org3_Gene1333	>unique/5126/4/Org4_Gene1825
		MRPAPLRPAAAAVAAPAQPQRYLTNDEAAEYLRLSPRTLEKQRVIGGGPKFRKFGRRVMYAVSDLDAWADQRSYEATSDPEYAERHAGDYRDGR	MRGWRRIAKKSQHPSWLNNTGSNVSNVVPSQGSRIVMNTIGN
		>unique/4376/3/Org3_Gene1329	>unique/5149/4/Org4_Gene2279
		MTAKQPPNGKRTGKRVGIGARPPANPHAEAWIRQGDADALGKGDFYTARLTLDITPAMRARIKVSAFTQGVTVADLLRGLLEREFPEHRREKTP	MPLNIDYPYKNTSWPLSQKTLIKEHIRYLYYNSKLKLRCCC
		>unique/4419/3/Org3_Gene1308	>unique/5150/4/Org4_Gene2794
		MSGPDSFAAGFEVPLHRSLTEPLLMGGAPRTVAIANGTLAAAVGLGLQLWIPGVVLWIVGHSLAVWGARVDPQFMQVFARHIKHKPLLDV	MRRKTFTHEFKQECGNLVLQQQCSVTQVAETMNIGLSTLQR
		>unique/4420/3/Org3_Gene2974	>unique/5153/4/Org4_Gene514
		MVGESRQIGSVSIQGETIEELRANLLRDIWGIIEVGYAVEQSKKMCREQLSEQAVASFADYQNSGKHLTGKEVIDFLRSGKTGELPECHR	MFREKIYLHSINGEQLKKISVDTQVLSHVIAMIARRSANQA
		>unique/4421/3/Org3_Gene2953	>unique/5180/4/Org4_Gene2793
		MIKVYKQFENIMIKLRDNVLFLVLIIVLFDSCIRNKHDYLVGVPLFFVSDVFSACMAKFFEKRKILVKLASFIIFYGVMIVLVASFIKSR	MPHAAAKHINAEMDETYVRRHMCIKLREQGLTLSDTVSVR
		>unique/4447/3/Org3_Gene2132	>unique/5187/4/Org4_Gene1442
		MPTGTLCPLVQASLVVKVVCFLSLIKQISPRNRAANTDFDNLSYPLRDGLVIMVTMVTMVTMVIMVIMVIMVTLQPPCDVFTLRTFFG	MLVFLSCLYGSERIPLGLLSNRGFLSCLYGSELYLIPPTC
		>unique/4448/3/Org3_Gene1314	>unique/5190/4/Org4_Gene4289
		MKRMTPLLLIAVLTGCGPSETSKPPNLPTVEELAADPTRLKELRQQCKTDRATHGDVLCNRVAEATRKRFYGDGKTPYTPPDTPPKF	MYQISGGLVSKIVGLLFSCCQFVQWTGIHLLSEGYDANLR
		>unique/4459/3/Org3_Gene1166	>unique/5203/4/Org4_Gene2821
		MKNLPDSITLEELLDVISKEMEGTPSEKLTEKLIITIGILQDVYDIDENANNYILYSVAGLEEQSNKRTLTNAQAAQKIINKKKQGK	MDYPISSQFSWVQLHLNKLTPEKYWLMAEKPDILKSVWN
		>unique/4492/3/Org3_Gene3525	>unique/5216/4/Org4_Gene2753
		MPEIDRMFGLVFCMYYYDTGKHSLPHVHVKYGNYELIVDINTCIEIEGYLPNKKRKAALLHIEQNKKKLLQMWQLAVNGINPGKI	MAFPEGQLYHVDFVVSYSKSYFWNACNYIFHYFSIRIKA
		>unique/4502/3/Org3_Gene1476	>unique/5287/4/Org4_Gene2119
		MDKNTFWSYTTPLPTHFDGVEEGGFSSASEHNAERQQVDIVVYIASEDILNVEIEVRNFNIADSGLGNSNRSFRERIFLRKNEK	MSLNPASLNVAETSCGVFLVFLLDCHADSLSVGLGETR
		>unique/4504/3/Org3_Gene2963	>unique/5290/4/Org4_Gene2013
		MIVNGKKIKAKDLAKMAGVSRSTVIKYYGITRDEYEKEAAEKRSLAFQLRSSGLKWKEVAEKMNTTQNSAIAYYRRYIKSNHTL	MVNYREELTYQKMTWAAFATVKSDKKGNLRDAAAGCNP
		>unique/4506/3/Org3_Gene1331	>unique/5291/4/Org4_Gene2819
		MDGLVLSGVPGIVLSGVRLSCYQEYENAGKPITARVCGASNFPNKKYITFSRSAPFRWTTEKRHGEQRFARQVKPGFPAGRAAP	MLKENFNELQIFLVVARERSFTKAAGKLGFLSQHSATR
		>unique/4512/3/Org3_Gene1463	>unique/5319/4/Org4_Gene567
		MKKNNINQQRTALYEQNEVTPRRLIRLPEVLKRVGLSRARMYGLINAGRFPKQVRIGLRSVAFIESEIEAWMDSVIAARNESH	MSEFLTLPARYFANIRINPTHRPPLTLKAAGWKRRGL
		>unique/4514/3/Org3_Gene1252	>unique/5343/4/Org4_Gene2798
		MFFNLSVLNLEDHLGLVISPQSPLSAGYITLQACRRSLPLRFSTVTPGGLVGLLVMSYRFNIPDRLVVHLSIHADPELRAHYS	MMNQENIFLKINDNPIEFYKDRFLLTYNSVLTLHIFY
		>unique/4522/3/Org3_Gene1348	>unique/5344/4/Org4_Gene2770
		MILPSKHLQQDRALLTVGAHVLTYLVRPKTVSALWEELNKHEPSVATMPRKITYDWFLLALDLLYAMGTIELESGLVARRAP	MVFNRQRGEAQTEAERSAASTEQSAPRRGIKNHPAWQ
		>unique/4536/3/Org3_Gene1167	>unique/5366/4/Org4_Gene114
		MFIKTIGKTNHSEWVVRNSLYWMSAYTRWQLGADDNGWIVFFKSFDDTIKFELERFLIHTYPFCVNPRYLSSHYRSDLDH	MSITTTLSVSIVVTLSEKETEGDGMTDETCFP
		>unique/4539/3/Org3_Gene1300
		MTTRKLRLGPLPKTESTKLTFACSAALKADLDRYAALHAQTYGEAVDATTLIPHMLDAFMAGDRGFRKGGVSKATPPKPS
		>unique/4541/3/Org3_Gene2769
		MDAVTRDRLGKTVSINDEDFIAVESHLIPELGPVTGDGISLVLLSGNYRPRRNDAVVLDGKSYIVTRYQVFNGKPQIWIE
		>unique/4564/3/Org3_Gene2933
		MKKKKLKKNPLEDTAVLSRIAQRASQKAINEAFKAGMPIHCISEGKLVKLYPDGRKECVKVLNIEPISLASAVRQLSR
		>unique/4570/3/Org3_Gene3509
		MDMCPICQDSLRESVVAEVDGEHYKSCPSCSCKSGYHVFYRYEDFGMRNMGDGRQIVQSWCPGCRLEQGTYPSVAFDC
		>unique/4590/3/Org3_Gene2799
		MKNIAVEKAIAIAGSQKKLANRCGKSQSTICDWLNGKKKISPEHVPDLVSATDGQVKAHEFRPDLPNIFPSPNEE
		>unique/4605/3/Org3_Gene2778
		MTVRAKFRCHYIQKADDDSHRTIHMSPVTADTEENKTWSKYTPGGLLQMHISNPAAFEQFEQGKEYFIDIQPAG
		>unique/4606/3/Org3_Gene2795
		MILDDIELAKQLEEKQLWRRAARQWLTVMDRTKGTTERGLVATRRSICLGRARMSTQQYSGVRVMTAAGGVLND
		>unique/4615/3/Org3_Gene2967
		MSRYNIKEKIERDPDGKVVSETWEIFHEDGRRIKGGILSEKIAQEEVEALDTIDELEEASKHIKVSHKKSTLD
		>unique/4633/3/Org3_Gene2988
		MVQIEANKKQRLIRLPEVIRRTGFGKTWIYTLIKAGRFPSQVKTGLRSIAFIESEIDAWIEKIISDSRPVSE
		>unique/4634/3/Org3_Gene2773
		MNQADIENMIEKYLEAEMAVLAGKSITFNGQAMTMENLSEIRAGRESWERRLSNYKAALRGRPMYKLARFPR
		>unique/4662/3/Org3_Gene2924
		MDGMIDEFEYGYPCPCCGKHEFEELGEYDICSNCGWEDDPFQSKNPDRSGANKMSLNEAREAFRNGQKVK
		>unique/4677/3/Org3_Gene2923
		MESYSLFDVICLKNDLPEEGLKKGMLGAIVHIYNEPSPAYEIEFCDDNGETLACITLTLECFSKVDFKK
		>unique/4679/3/Org3_Gene2806
		MSKLMKASKWGKREFEVGSEPDTRTIKRWIENGLLRGRIIDGSVWVCSSEKWGVDSTVSQAVMRLISEE
		>unique/4680/3/Org3_Gene2928
		MNKGKVGWISLFVLVFLITLFIDLGRIKNSTLVDKQDVNHLVINCSCEPHAAHSVDNLNCMRVFIIVGE
		>unique/4694/3/Org3_Gene3512
		MKIRSLLLCVLLINLLYVPALLFNVKLMWILILKDVLEIIIFFVDFTVFTCLVVFTIDKINNFTGRRK
		>unique/4701/3/Org3_Gene1174
		MTFFIKKILAFILNHLAMFLFPFCFFWMLYILFVGYAPWSEKIIHLIIAGIILYILGRISDWYYKDK
		>unique/4741/3/Org3_Gene3086
		MITAGADHVKGVNHKIALFGERMCNMPIFLANTDSLSCSFIASVDALTIFICRTTPIAALILTE
		>unique/4743/3/Org3_Gene4512
		MPAIFNVQQHQQLVCFIFSNEINNRARSLYFPIYNGVLFLKSRWWLTHDKWKITFPDANKIKQ
		>unique/4766/3/Org3_Gene1346
		MASSDVVRARIDGHIKEEATNVLAGMGLSVSDAIRILLTRIAADKALPFDVNRGQQQTNTKKQ
		>unique/4779/3/Org3_Gene1163
		MKLILYFFLLFLFVCSNTLSILLFNEDVSVFWEWFTSANLAITLVFGPLIVALFFFNYPKKI
		>unique/4850/3/Org3_Gene1483
		MDGRAKYSEILTRLGFDGVRRTERVLNYPAARRENTKTQKAVKDSDDFPENKVKGE
		>unique/4893/3/Org3_Gene2946
		MESGEKVWQTALREAKEETGLTLSNLYSSDYCERFYEANRDAITLVPFLFPM
		>unique/4894/3/Org3_Gene2977
		MKKEGKLHNKNINFIHKKLMIFNIETPHGDHKNRPVSFNPLKYYLLFLAKLN
		>unique/4928/3/Org3_Gene2942
		MNACKTKRRIKRRNLDKWAKYSLDIIVMGFRWRPKDKKNVGLSRHKAGER
		>unique/4929/3/Org3_Gene1482
		MAIKNKAMPTYALSLRSNAVGSTDGCLPQAKTVSCGNKIKVNVNPGVFLT
		>unique/4930/3/Org3_Gene1517
		MNLAAARFLRYSCPLIGPPATRSRRGAGFRGVHAAHPAVMHTSARFFTPM
		>unique/4951/3/Org3_Gene2941
		MYSDYLAGIAAAGADVLYVLTSNRPRNYVVQKKRVRWLRIIGYLRLIIG
		>unique/4952/3/Org3_Gene3024
		MADKKLVKGHTAVIAAEESKSRLREIFINSPCIRRYPLRHQFAGGNGAK
		>unique/4954/3/Org3_Gene2182
		MSKNSALLFQVIRRKTKRYCQEIVRLAKGIRQRLNPFDLLLFLAAGFHC
		>unique/4987/3/Org3_Gene2562
		MIDKDKIPLVYRQYQLDNHVNEPVQGDRVSVSSCLISLIIYLVERKQ
		>unique/4994/3/Org3_Gene2920
		MSAIRGFFNLSLLCKLKRPNHTVAVSIKKISPPLQHQATLFKVFDLT
		>unique/5037/3/Org3_Gene3915
		MAVDKIALGACAKEALLSLNVLSKNFKWKNHDRKTIKSLPALYTV
		>unique/5043/3/Org3_Gene2131
		MFLNLYSLRGKNNSYWLLMIHMHLLILIFTMTKNGCDWIYQFSYD
		>unique/5048/3/Org3_Gene2783
		MLLPHKKIGWMISEIAAQPHHFHRESDWQASGLLAEHIHQPKPQ
		>unique/5058/3/Org3_Gene863
		MAGKRAACLVVEHRTSRQHTDVTCESTEALPFSRTGKAYRIFIL
		>unique/5091/3/Org3_Gene3944
		MRLTSGLHYTDQRRPNNIILITFDLLLCDAGRIFQTNRKVELF
		>unique/5096/3/Org3_Gene1855
		MKKIQVSFVLIQNIVNERRLYSNLSVEFSPCLPKDKHVLRQKG
		>unique/5098/3/Org3_Gene1002
		MAFITSPAALTAVFVRLPDNPSRSAEISNQLCMILVINTNFLS
		>unique/5115/3/Org3_Gene1572
		MLLFLMVNYLTQIFPKSNLSKKLRRPREKTASIAQKVIYARK
		>unique/5120/3/Org3_Gene2930
		MICYFHFHRPFLFTYILISKNKKAVKALTKIQLSIYFKLTKM
		>unique/5122/3/Org3_Gene2776
		MHRAFINRDRIHYSTFYDGRWLHCAGMRLMYGPSHHSNHSAG
		>unique/5128/3/Org3_Gene4036
		MEYRAAPYSPHSIVFKEMRDGHPSGKRYAPYLGQKRGTQDEY
		>unique/5157/3/Org3_Gene2178
		MLWTLAKNGTITGGVKNNLLKISVIKIILGWHKACSSVFAK
		>unique/5158/3/Org3_Gene1341
		MPFLGLAAFCVFLPPLQNVNVPLQLKERLFDHSVPKSLLIR
		>unique/5159/3/Org3_Gene1487
		MKLQSLLVYVPDPSMSFHRHFHQCICILQDELLEQQQDVKI
		>unique/5188/3/Org3_Gene2779
		MYHGDYNAAFIFLGIVCAVVGWGVIEGALWLLSHVSISWA
		>unique/5193/3/Org3_Gene3508
		MLTSRNYDHDSFVCVFFDVVNTFHSVFYEARTYICCIGFL
		>unique/5195/3/Org3_Gene3630
		MNGSVYRDTYTSQKVQLEFTLSNLTSDIFTLSKRDHAGEQ
		>unique/5196/3/Org3_Gene4147
		MHRYTKKSAAYVGSQLQLPSGSQPAFSFPSLNRSIKKAPQ
		>unique/5235/3/Org3_Gene473
		MNRIKKEYLRSLLNSTAFRIQVTVKVTSSARWAKVPFWS
		>unique/5238/3/Org3_Gene2991
		MKAFARVSSDVRVCARSYAFGNEACAQTRTSRPHLREVK
		>unique/5239/3/Org3_Gene2005
		MFSRIRRVKLLYQQINEPVSSSRDNAAFVLASRYWACIG
		>unique/5251/3/Org3_Gene1335
		MPSGRHQNWLGCNCRCQDHLAPACCGNRLKATATPSGK
		>unique/5280/3/Org3_Gene830
		MKNGIFLSNLDNINKKCRINLPESQRPSFILFIIKTIG
		>unique/5324/3/Org3_Gene4229
		MAFHPWPSPLRAVADTTLKISPGNFLTLAIFWPVKPS
		>unique/5325/3/Org3_Gene4181
		MTGRLILGLDRQEISGNPAFYRRCLRDNEYRHWQEVI
		>unique/5332/3/Org3_Gene1786
		MDPTVMTAYQLSIAGIILTISGYCTGGHLLYLIGRLC
		>unique/5333/3/Org3_Gene2495
		MSCPPVFHNTNHFQLVYIRFTLSVDNLANKINYLLCV
		>unique/5334/3/Org3_Gene2329
		MQSRCKRRSKTFLTFLSMAQTLYSSIPLLSFFIQSMA
		>unique/5335/3/Org3_Gene2028
		MGTVALFIQNSEKTLIVIFSIDLSALSGVDFINKVKR
		>unique/5352/3/Org3_Gene2975
		MKNNNKQQQRENLCERSSVENKKRKIPKYTFDQFLV
		>unique/5371/3/Org3_Gene2332
		MRFQRKGQIMTQMGYILGVYLPIFNLAGSG

## Sheet: TableS5_ICE_ICM_elements
Table S5. The list of integrative conjugative elements (ICEs) and integrative mobile elements (IMEs) found in P. betavasculorum genomes.
	CFBP1520	SF142.2	NCPPB2793	NCPPB2795	CFBP3291	Ecb168
ICEPb1	Putative ICE with T4SS region1 pilus genes	Putative ICE with T4SS region1 pilus genes	-	Putative ICE with T4SS region3 pilus genes	Putative ICE with T4SS region1 pilus genes	-
		Putative ICE with T4SS region3 pilus genes	-	-	-	-
ICEPb2	Putative ICE with T4SS region 2 vir genes	Putative ICE with T4SS region 2 vir genes	Putative ICE with T4SS region1 vir genes	Putative ICE with T4SS region 4 vir genes	-	-
ICEPb3	Putative ICE with T4SS region 3	-	Putative ICE with T4SS region1	-	-	-
ICEPb4	-	-	Putative ICE with T4SS region3	-	-	-
IMEPb1	Putative IME region4	-	-	-	-	-
IMEPb2	Putative IME region5	-	Putative IME region2	-	-	Putative IME region2
IMEPb3	-	-	Putative IME region6	-	Putative IME region 2	-
IMEPb4	-	-	-	Putative IME region 1	-	Putative IME region4
IMEPb5	-	-	-	Putative IME region2	-	Putative IME region3
IMEPb6	-	-	-	-	-	Putative IME region 1

## Sheet: Table S6 prophages
Table S6. The list of prophages regions detected in P. betavasculorum genomes
Pb strain	Region	Region Length	Completeness	Score	# Total Proteins	Region Position	Most Common Phage	GC %
NCPPB2795T	JQHM01000001.1
	1	26.9Kb	incomplete	30	21	844571-871511	PHAGE_Ralsto_RSK1_NC_022915(3)	50.16%
	2	46.8Kb	intact	100	50	863053-909926	PHAGE_Shigel_POCJ13_NC_025434(7)	49.62%
	3	38.3Kb	questionable	90	52	1413243-1451627	PHAGE_Burkho_BcepMu_NC_005882(32)	52.74%
	JQHM01000002.1
	4	19.5Kb	incomplete	40	15	282359-301944	PHAGE_Escher_500465_1_NC_049342(8)	47.55%
	5	11.3Kb	incomplete	20	12	476317-487682	PHAGE_Klebsi_ST147_VIM1phi7.1_NC_049451(5)	48.96%
	6	22.2Kb	incomplete	40	25	524115-546340	PHAGE_Brocho_BL3_NC_015254(1)	48.21%
	JQHM01000008.1
	7	21Kb	questionable	90	21	95861-116906	PHAGE_Salmon_118970_sal3_NC_031940(3)	49.79%
	JQHM01000009.1
	8	15.5Kb	incomplete	60	16	28351-43930	PHAGE_Erwini_Hena1_NC_048828(2)	49.59%
NCPPB2793	JQHL01000002.1
	1	12.6Kb	incomplete	40	20	169733-182336	PHAGE_Erwini_vB_EhrS_49_NC_048197(5)	45.61%
	JQHL01000003.1
	2	19.9Kb	incomplete	40	23	43131-63080	PHAGE_Klebsi_ST13_OXA48phi12.1_NC_049453(5)	49.33%
	3	28.3Kb	incomplete	40	26	229629-257937	PHAGE_Escher_500465_1_NC_049342(8)	50.71%
	JQHL01000005.1
	4	36.5Kb	intact	93	50	172753-209280	PHAGE_Burkho_BcepMu_NC_005882(33)	52.90%
	JQHL01000010.1
	5	15.5Kb	incomplete	60	16	28350-43929	PHAGE_Shigel_Sf6_NC_005344(2)	49.62%
	JQHL01000012.1
	6	15.2Kb	incomplete	20	9	650-15886	PHAGE_Burkho_KL3_NC_015266(1)	49.34%
	JQHL01000027.1
	7	10.8Kb	incomplete	30	11	4948-15789	PHAGE_Paenib_Lucielle_NC_048716(1)	46.14%
Ecb168	CP118484
	1	22.3Kb	incomplete	60	24	56471-78820	PHAGE_Escher_ArgO145_NC_049918(2)	53.26%
	2	11.3Kb	incomplete	20	14	636398-647700	PHAGE_Klebsi_ST13_OXA48phi12.1_NC_049453(5)	49.07%
	3	25.8Kb	incomplete	40	22	815694-841520	PHAGE_Escher_500465_1_NC_049342(8)	49.77%
	4	12.6Kb	incomplete	40	21	1209242-1221845	PHAGE_Erwini_vB_EhrS_59_NC_048198(6)	45.62%
	5	59.8Kb	intact	150	65	1823875-1883748	PHAGE_Entero_mEp213_NC_019720(12)	48.74%
	6	8.8Kb	incomplete	30	10	1980019-1988850	PHAGE_Agroba_Atu_ph07_NC_042013(2)	51.37%
	7	15.5Kb	incomplete	60	17	3418176-3433732	PHAGE_Erwini_Hena1_NC_048828(2)	49.62%
	8	40.5Kb	intact	93	56	3814564-3855123	PHAGE_Burkho_BcepMu_NC_005882(33)	53.32%
	9	16.6Kb	questionable	70	7	4107798-4124492	PHAGE_Vibrio_12A4_NC_021068(1)	56.53%
CFBP3291	CP129215
	1	22.3Kb	incomplete	60	24	57801-80194	PHAGE_Escher_ArgO145_NC_049918(2)	53.34%
	2	18.4Kb	questionable	70	14	1166396-1184840	PHAGE_Shigel_Sf6_NC_005344(2)	49.43%
	3	26.9Kb	incomplete	30	23	2101509-2128449	PHAGE_Escher_RCS47_NC_042128(2)	50.16%
	4	46.8Kb	intact	120	53	2119991-2166864	PHAGE_Escher_PA28_NC_041935(9)	49.62%
	5	55.6Kb	intact	93	53	2659259-2714932	PHAGE_Burkho_BcepMu_NC_005882(33)	53.10%
	6	6.2Kb	incomplete	40	8	2965004-2971214	PHAGE_Gordon_Rosalind_NC_030694(1)	49.70%
	7	19.5Kb	incomplete	40	15	3733203-3752788	PHAGE_Escher_500465_1_NC_049342(8)	47.54%
	8	11.2Kb	incomplete	20	11	3927161-3938397	PHAGE_Klebsi_ST147_VIM1phi7.1_NC_049451(5)	49.04%
	9	20.3Kb	incomplete	50	22	3977779-3998080	PHAGE_Paenib_Tadhana_NC_048691(1)	47.43%
	10	12.7Kb	questionable	70	22	4327509-4340211	PHAGE_Shigel_SfII_NC_021857(3)	50.54%
CFBP1520	jcf7180000001567
	1	54.8Kb	intact	150	74	242512-297346	PHAGE_Escher_HK639_NC_016158(13)	49.97%
	jcf7180000001572
	2	16.5Kb	incomplete	30	13	88953-105545	PHAGE_Paenib_Pagassa_NC_048690(1)	49.58%
	jcf7180000001573
	3	24.3Kb	incomplete	40	13	138368-162692	PHAGE_Entero_P4_NC_001609(2)	50.82%
	4	39.5Kb	questionable	82	54	233141-272661	PHAGE_Burkho_BcepMu_NC_005882(29)	53.12%
	jcf7180000001574
	5	25.8Kb	incomplete	60	19	110101-135916	PHAGE_Escher_500465_1_NC_049342(8)	49.79%
	6	11.3Kb	incomplete	20	12	302492-313857	PHAGE_Klebsi_ST147_VIM1phi7.1_NC_049451(5)	48.97%
	jcf7180000001517
	7	52.1Kb	intact	140	61	12128-64277	PHAGE_Pectob_ZF40_NC_019522(17)	48.38%
	jcf7180000001580
	8	11Kb	incomplete	40	18	131154-142247	PHAGE_Escher_ArgO145_NC_049918(2)	49.84%
	jcf7180000001579
	9	15.5Kb	incomplete	60	16	29119-44697	PHAGE_Shigel_Sf6_NC_005344(2)	49.62%
	jcf7180000001507
	10	7.3Kb	incomplete	40	8	16015-23383	PHAGE_Pectob_ZF40_NC_019522(3)	48.92%
SF142.2	scf7180000000112
	1	54.8Kb	intact	150	75	243256-298089	PHAGE_Escher_HK639_NC_016158(13)	49.97%
	scf7180000000114
	2	19.2Kb	incomplete	30	11	263893-283126	PHAGE_Ralsto_RS138_NC_029107(1)	48.88%
	scf7180000000116
	3	24.3Kb	incomplete	40	13	143515-167839	PHAGE_Entero_P4_NC_001609(2)	50.82%
	4	39.5Kb	questionable	82	55	238288-277808	PHAGE_Burkho_BcepMu_NC_005882(29)	53.12%
	scf7180000000117
	5	25.8Kb	incomplete	60	19	110464-136279	PHAGE_Escher_500465_1_NC_049342(8)	49.79%
	6	11.3Kb	incomplete	20	12	302854-314219	PHAGE_Klebsi_ST147_VIM1phi7.1_NC_049451(5)	48.96%
	scf7180000000120
	7	52.1Kb	intact	140	58	11942-64110	PHAGE_Pectob_ZF40_NC_019522(18)	48.40%
	scf7180000000124
	8	15.5Kb	incomplete	60	15	47092-62670	PHAGE_Shigel_SfII_NC_021857(2)	49.62%
	scf7180000000127
	9	11.7Kb	incomplete	30	19	3120-14825	PHAGE_Escher_ArgO145_NC_049918(2)	50.44%
	scf7180000000138
	10	7.6Kb	incomplete	40	8	72-7734	PHAGE_Pectob_ZF40_NC_019522(3)	48.96%

## Sheet: Table S7 Secondary Metabolites
Table S7 List of clusters of genes for the biosynthesis of secondary metabolites identified in the genomes of P. betavasculorum strains. SF142.2. CFBP5271. NCPPB2795T and NCPPB2793
	Cluster of genes			Genomes of P. betavasculorum strains
		SF142.2	CFBP1520		Ecb168	NCPPB2793	NCPPB2795 T
1	1.6-phenazinedimethanol / fontizine A	+	+		+	+	+
2	O-antigen	+	+		+	+	+
3	beta-lactone containing protease inhibitor	+	+		+	+	+
4	amonabactin P 750	+	+		+	+	+
5	Linear azol(in)e-containing peptides	+	+		+	+	+
6	APE Ec	+	+		+	+	+
7	Homoserine lactone cluster	+	+		+	+	+
8	siderophore	+	+		+	+	+
9	β-lactam cluster	+	+		+	+	+
10	colicin V	+	+			+	+
11	rhizomide A / rhizomide B / rhizomide C	+	+		+	+	+
12	coronafacic acid	+	+		+	+	+
13	bicornutin A1 / bicornutin A2	+	+		+	+	+
14	icosalide A / icosalide B	+	+			+	+
15	xenoamicin A / xenoamicin B	+	+
16	hexose-palythine-serine. hexose-shinorine	+	+
17	orfamide A / orfamide C					+	+
18	gacamide A	+
19	holrhizin	+
20	glidopeptin		+		+
21	Le-pyrrolopyrazines		+
22	nunapeptin / nunamycin					+
23	microsclerodermin					+
24	thanamycin					+
25	syringomycin						+
26	teixobactin						+
27	N-myristoyl-D-asparagine / cis-7-tetradecenoyl-D-asparagine / (R)-N1-((S)-5-oxohexan-2-yl)-2-tetradecanamidosuccinamide						+
