# Supplementary figures and images for: Comparative genomics, pangenomics, and phenomic studies of Pectobacterium betavasculorum strains isolated from sugar beet, potato, sunflower, and artichoke: insights into pathogenicity, virulence determinants, and adaptation to the host plant
Source: Frontiers journal article supplement (doi:10.3389/fpls.2024.1352318), 2024-03-21

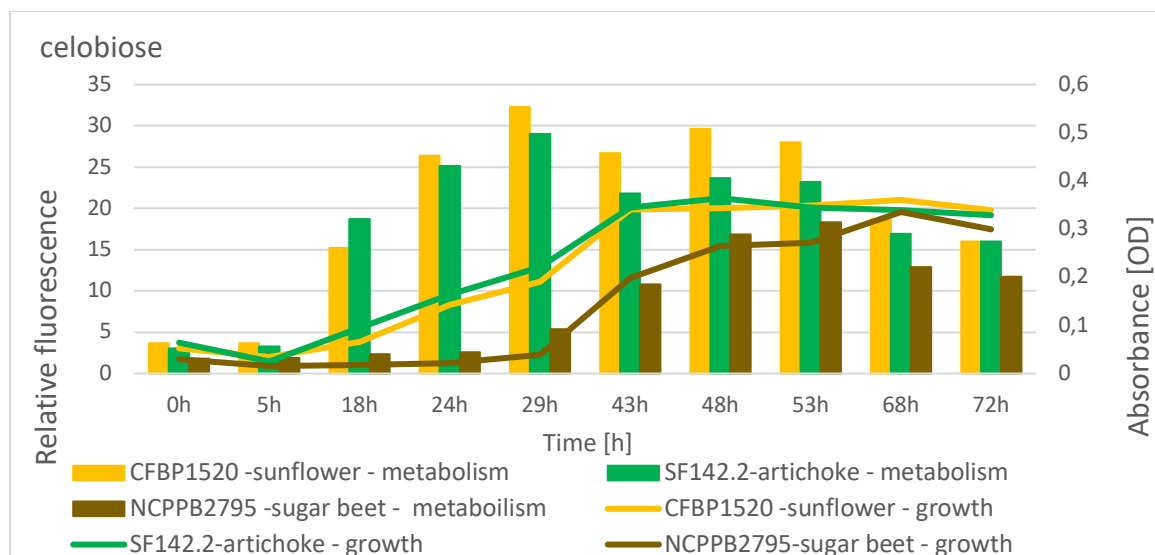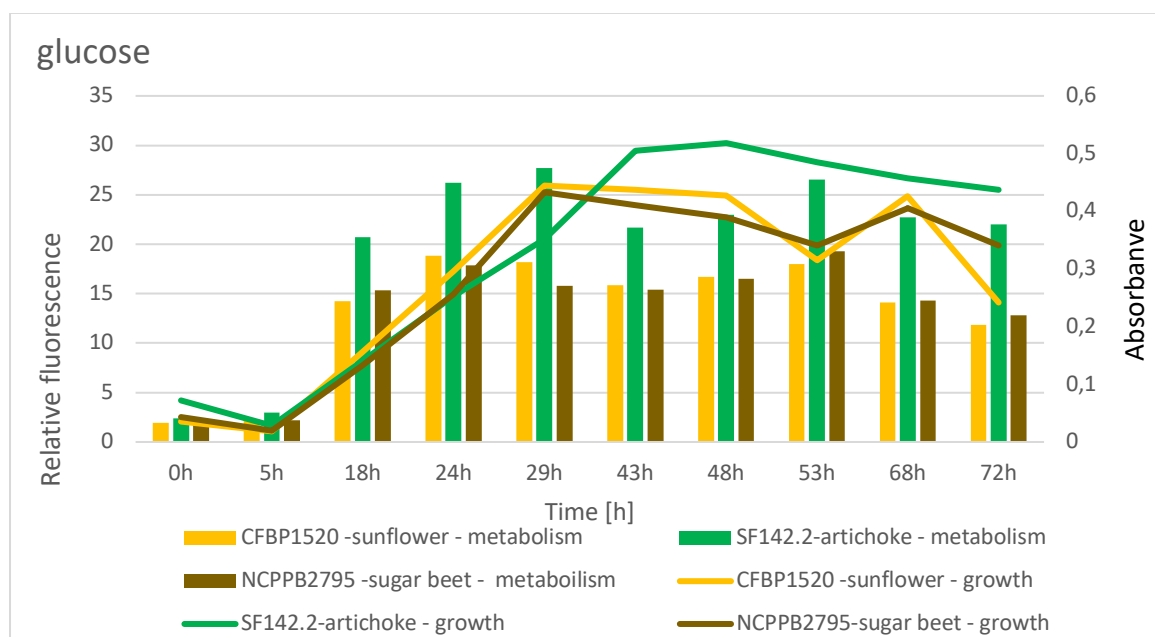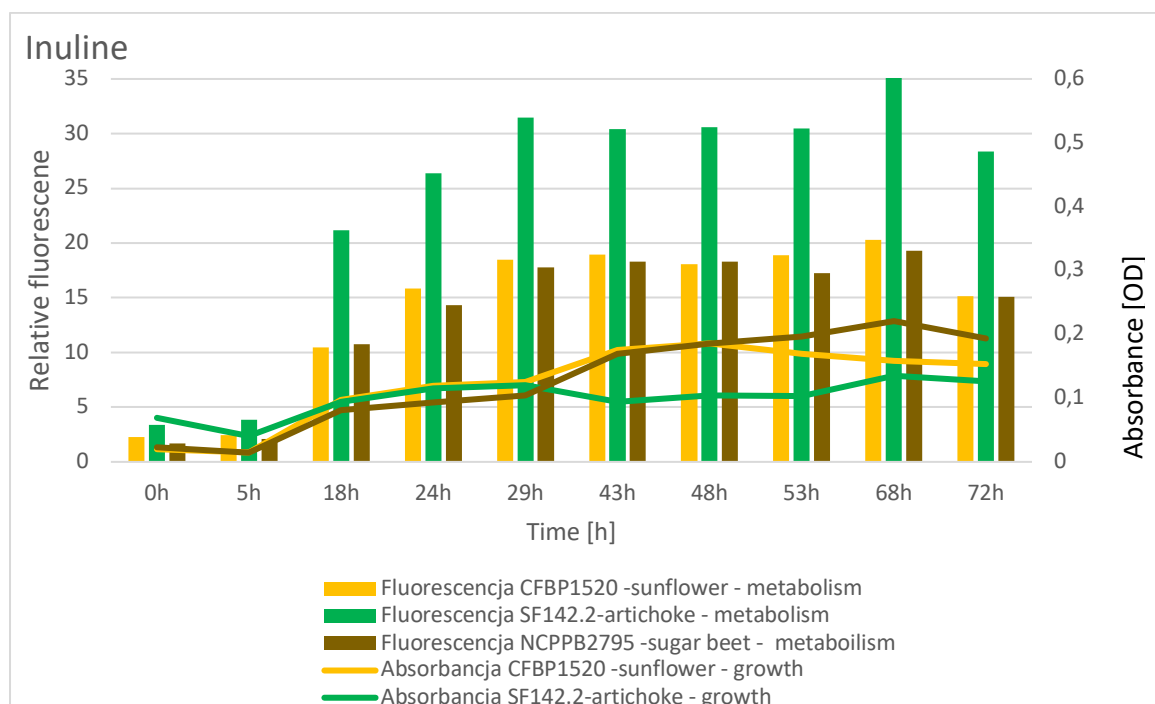

## Xylose

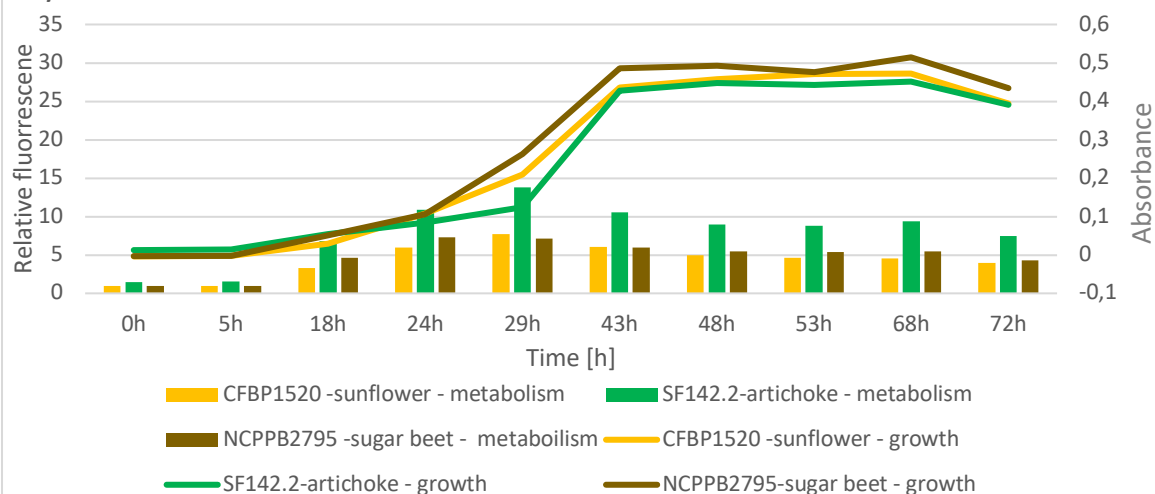

## Lactose

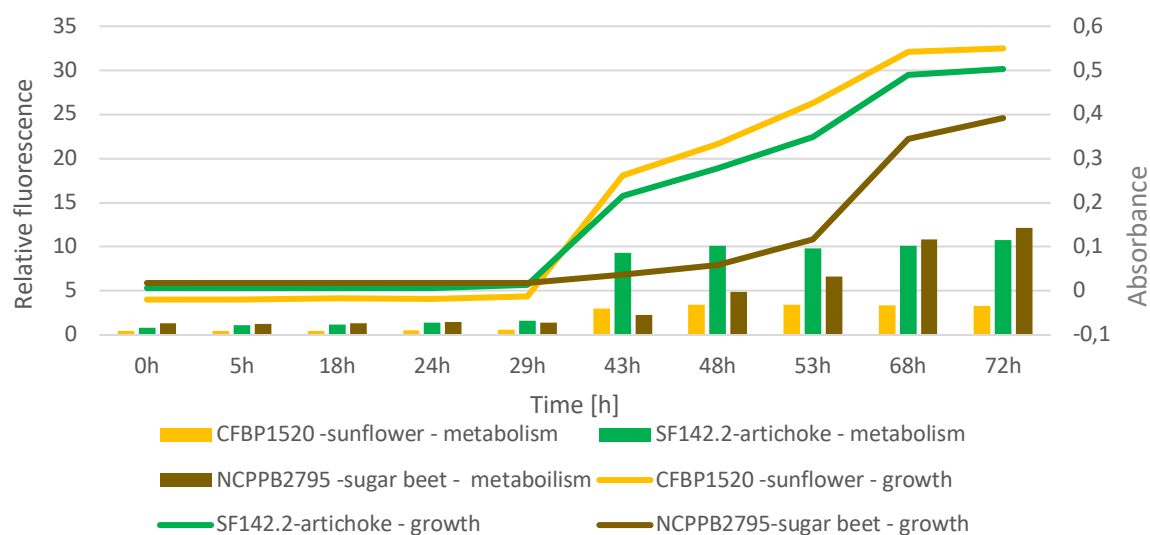

## Maltose

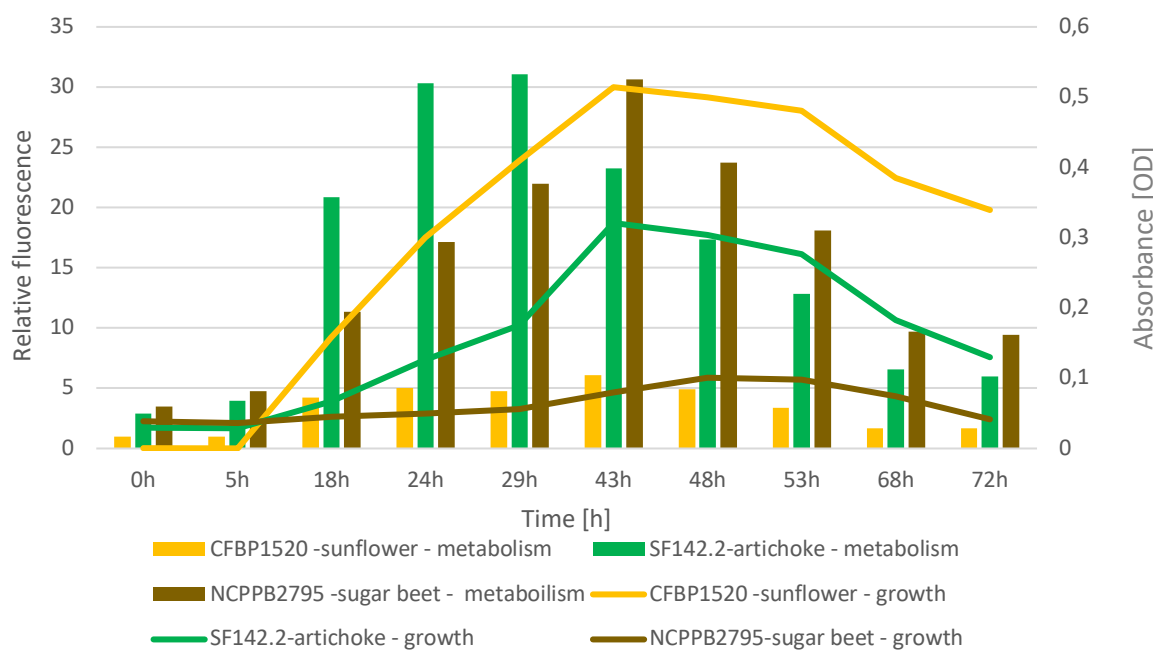

Melibiose

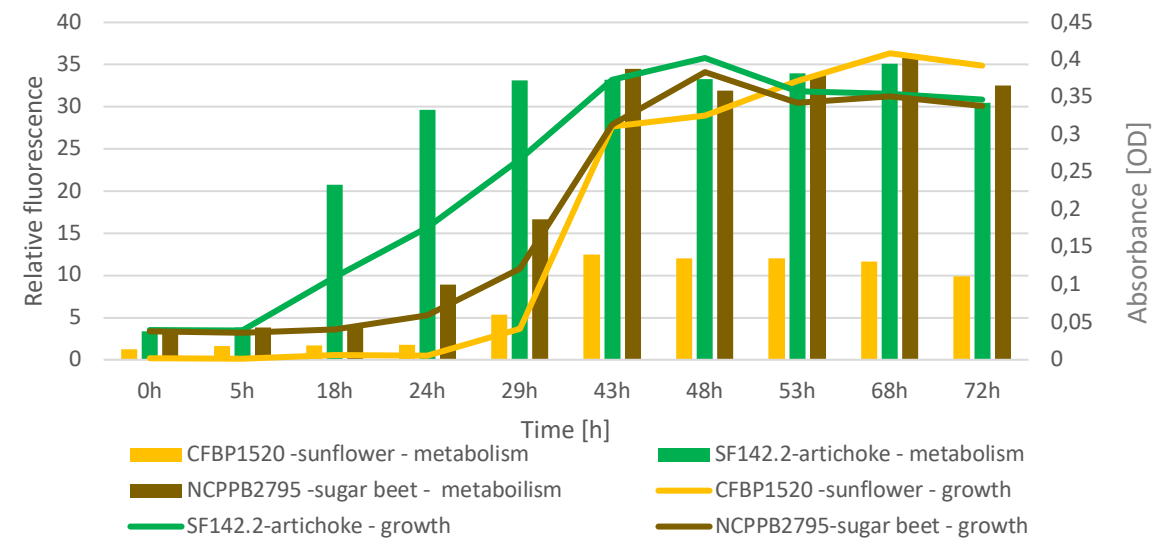

Palatinose

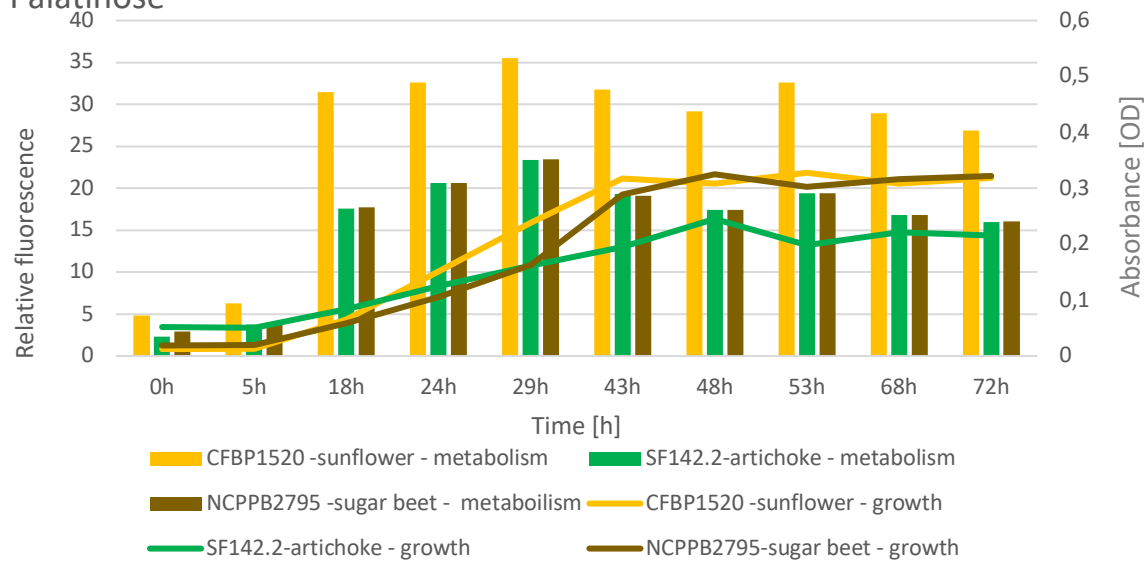

Rhamnose

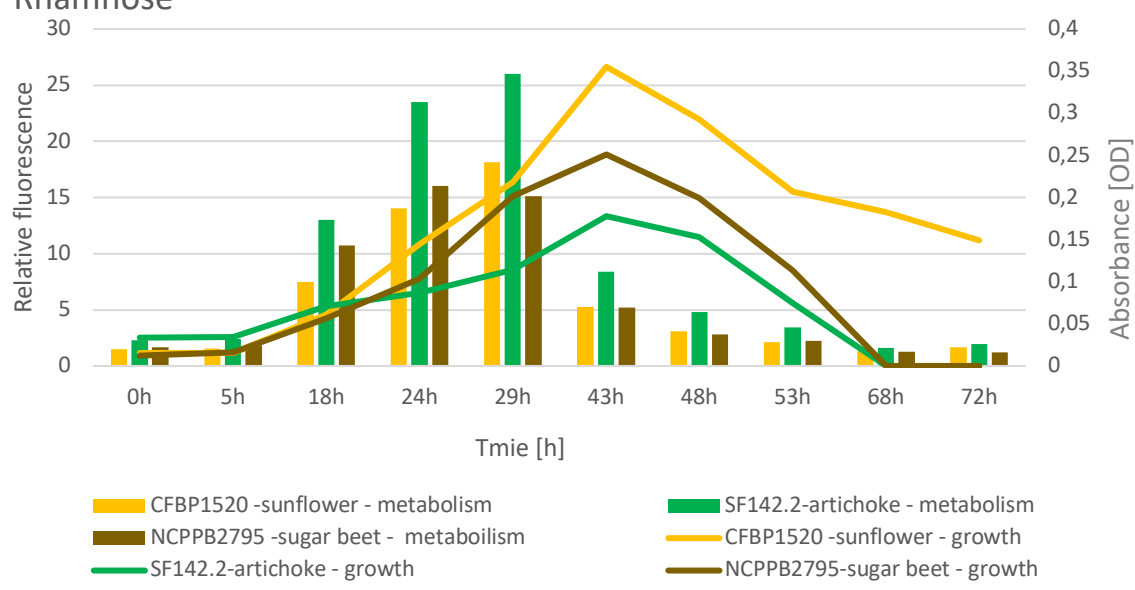

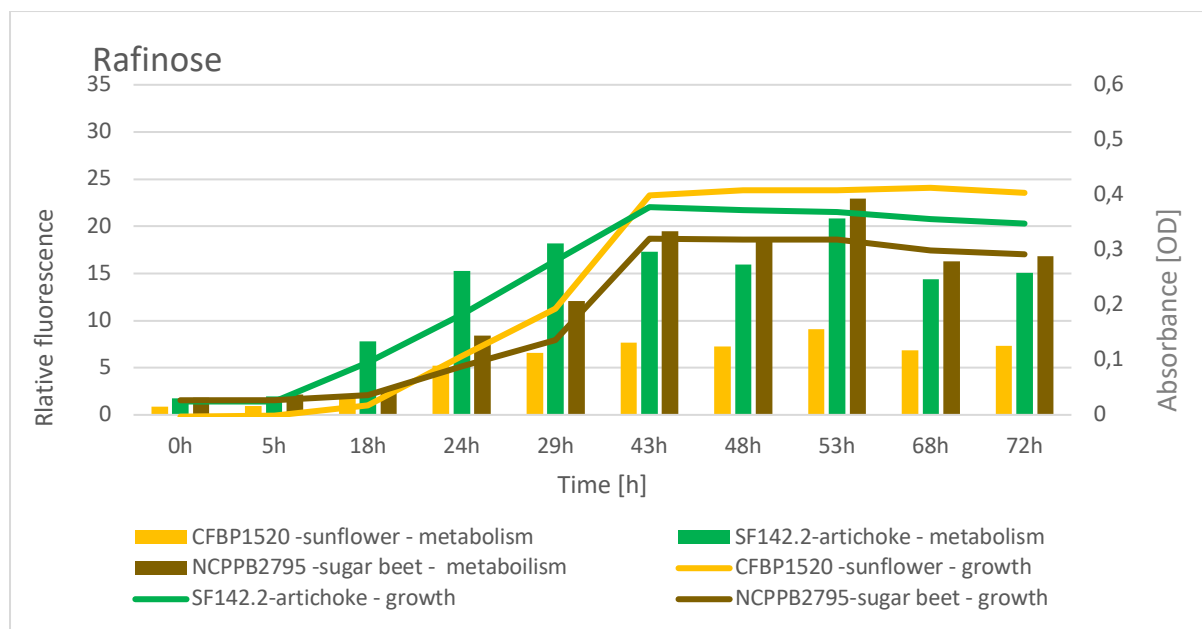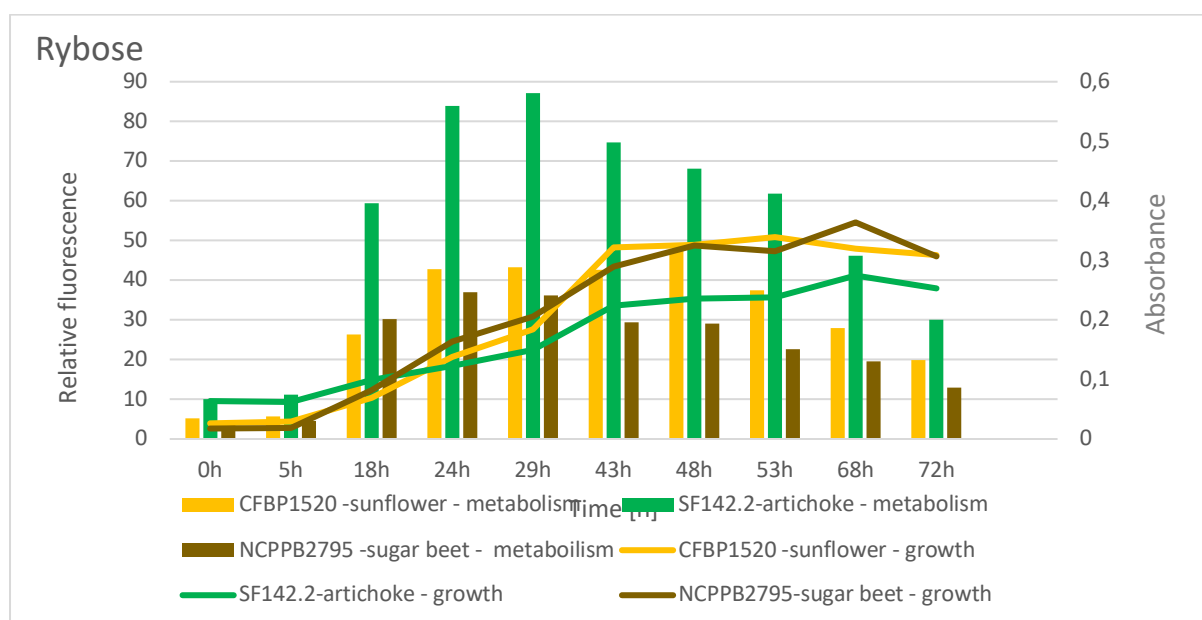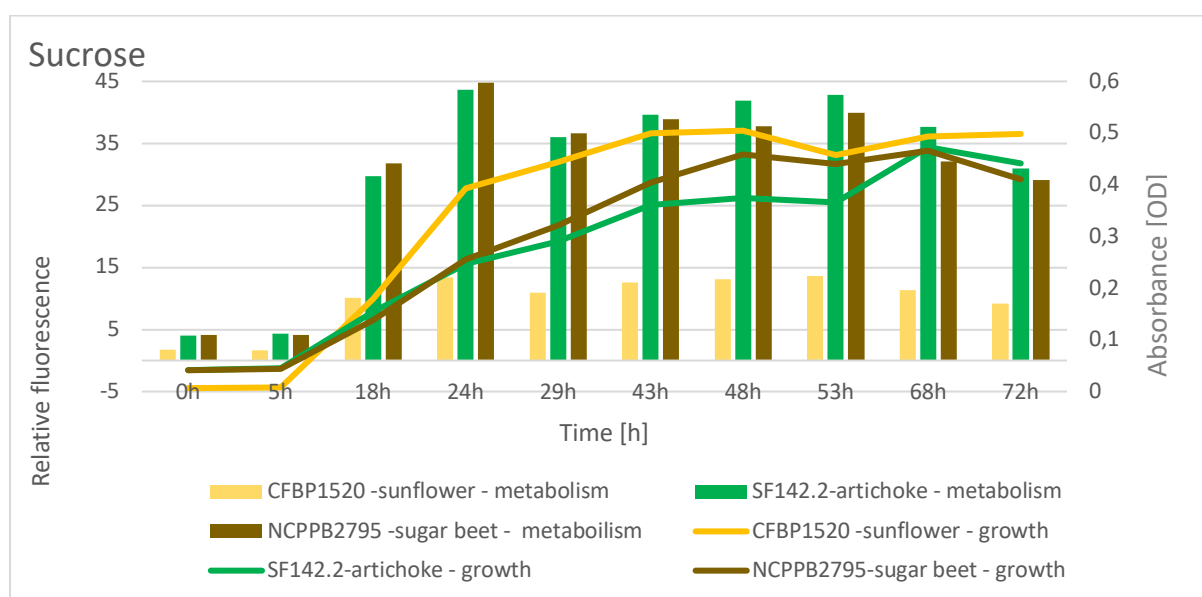

## Sorbitol

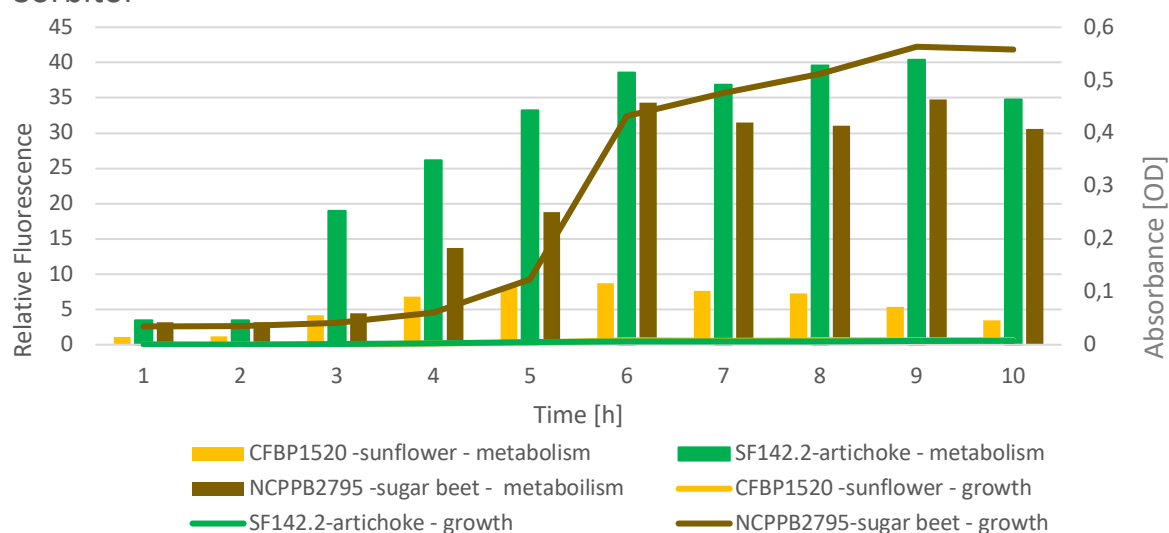

## Trehalose

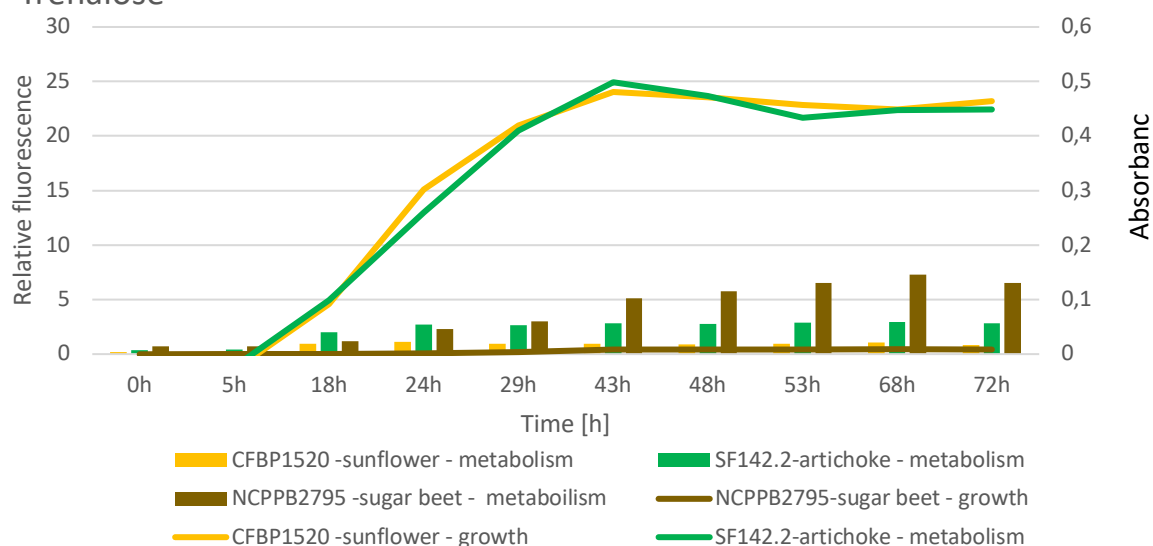

## Turanose

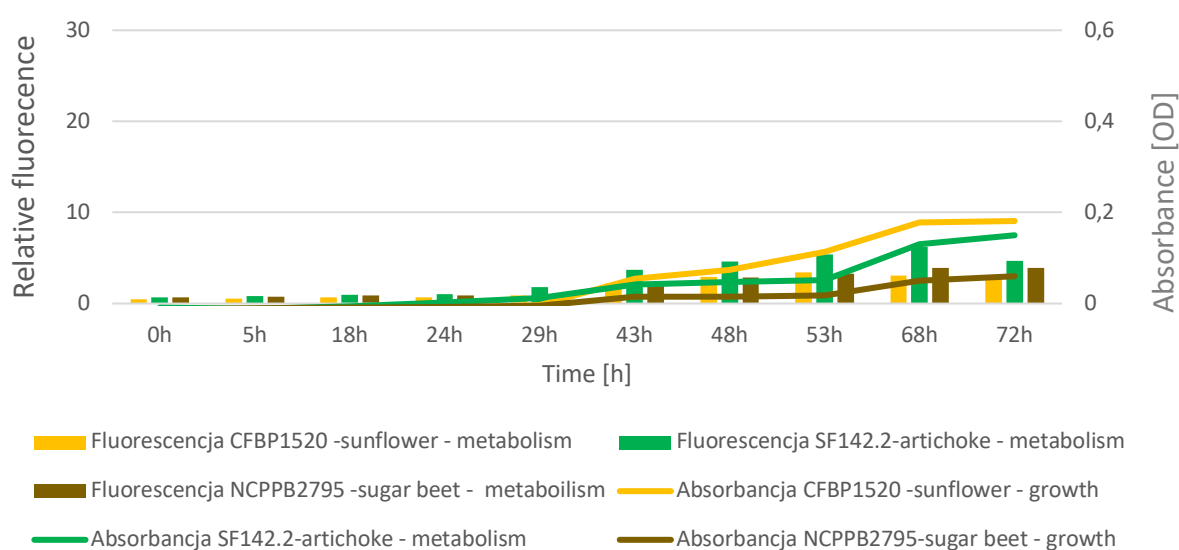

Supplement: Data_Sheet_1.ZIP [file Data_Sheet_1.ZIP]
